1 **Fibrillar A $\beta$  triggers microglial proteome alterations and dysfunction in Alzheimer mouse**  
2 **models**

3  
4  
5 Laura Sebastian Monasor<sup>1,10\*</sup>, Stephan A. Müller<sup>1\*</sup>, Alessio Colombo<sup>1</sup>, Jasmin König<sup>1,2</sup>, Stefan  
6 Roth<sup>3</sup>, Arthur Liesz<sup>3,4</sup>, Anna Berghofer<sup>5</sup>, Takashi Saito<sup>6,7</sup>, Takaomi C. Saido<sup>6</sup>, Jochen Herms<sup>1,4,8</sup>,  
7 Michael Willem<sup>9</sup>, Christian Haass<sup>1,4,9</sup>, Stefan F. Lichtenthaler<sup>1,4,5#</sup> & Sabina Tahirovic<sup>1#</sup>  
8

9 <sup>1</sup> German Center for Neurodegenerative Diseases (DZNE) Munich, 81377 Munich, Germany

10 <sup>2</sup> Faculty of Chemistry, Technical University of Munich, Garching, Germany

11 <sup>3</sup> Institute for Stroke and Dementia Research (ISD), Ludwig-Maximilians Universität München,  
12 81377 Munich, Germany

13 <sup>4</sup> Munich Cluster for Systems Neurology (SyNergy), Munich, Germany

14 <sup>5</sup> Neuroproteomics, School of Medicine, Klinikum Rechts der Isar, Technical University of Munich,  
15 Munich, Germany

16 <sup>6</sup> Laboratory for Proteolytic Neuroscience, RIKEN Center for Brain Science Institute, Wako,  
17 Saitama 351-0198, Japan

18 <sup>7</sup> Department of Neurocognitive Science, Nagoya City University Graduate School of Medical  
19 Science, Nagoya, Aichi 467-8601, Japan

20 <sup>8</sup> Center for Neuropathology and Prion Research, Ludwig-Maximilians-Universität München, 81377  
21 Munich, Germany

22 <sup>9</sup> Biomedical Center (BMC), Ludwig-Maximilians Universität München, 81377 Munich, Germany

23 <sup>10</sup> Graduate School of Systemic Neuroscience, Ludwig-Maximilians-University Munich, Munich,  
24 Germany.

25 \*Contributed equally

26 #Correspondence: Sabina.Tahirovic@dzne.de and Stefan.Lichtenthaler@dzne.de  
27

28 **Running title:**

29 Microglial proteomic signatures of AD

30 **Keywords:** Alzheimer's disease / microglia / proteomic signatures / neuroinflammation /  
31 phagocytosis  
32

33 **Abstract**

34 Microglial dysfunction is a key pathological feature of Alzheimer's disease (AD), but little is known  
35 about proteome-wide changes in microglia during the course of AD pathogenesis and their functional  
36 consequences. Here, we performed an in-depth and time-resolved proteomic characterization of  
37 microglia in two mouse models of amyloid  $\beta$  ( $A\beta$ ) pathology, the overexpression APPPS1 and the  
38 knock-in APP-NL-G-F (APP-KI) model. We identified a large panel of Microglial  $A\beta$  Response  
39 Proteins (MARPs) that reflect a heterogeneity of microglial alterations during early, middle and  
40 advanced stages of  $A\beta$  deposition. Although both mouse models display severe microglial alterations  
41 at late stages of amyloid pathology, MARP signatures occur earlier in the APPPS1 mice. Strikingly,  
42 the kinetic differences in proteomic profiles correlated with the presence of fibrillar  $A\beta$ , rather than  
43 dystrophic neurites, suggesting that fibrillar  $A\beta$  aggregates are the main drivers of the AD-associated  
44 microglial phenotype and the observed functional decline. The identified microglial proteomic  
45 fingerprints of AD provide a valuable resource for functional studies of novel molecular targets and  
46 potential biomarkers for monitoring AD progression or therapeutic efficacy.

47

## 48 **Introduction**

49 Microglia play fundamental roles in a variety of neurodegenerative diseases, including AD (McQuade  
50 and Blurton-Jones, 2019). Changes in brain immunity, together with extracellular A $\beta$  deposition and  
51 neurofibrillary tangles, are major pathological culprits in AD (Gjoneska et al., 2015; Guillot-Sestier  
52 and Town, 2013; Holtzman et al., 2011; Shi and Holtzman, 2018). The importance of microglia in  
53 AD pathogenesis is well illustrated by the increasing number of identified AD risk genes which are  
54 expressed in microglia and have functions in brain immunity (Cuyvers and Slegers, 2016; Guerreiro  
55 et al., 2013; Jansen et al., 2019; Jonsson et al., 2013; Karch and Goate, 2015; Lambert et al., 2009;  
56 Naj et al., 2011; Sims et al., 2017). For example, the triggering receptor expressed on myeloid cells 2  
57 (*Trem2*) and apolipoprotein E (*ApoE*) are major genetic risk factors for sporadic AD that are expressed  
58 by plaque-associated microglia and involved in A $\beta$  clearance (Bradshaw et al., 2013; Castellano et  
59 al., 2011; Kleinberger et al., 2014; Parhizkar et al., 2019; Reddy et al., 2009; Wang et al., 2015). It  
60 has also been shown that microglial phagocytosis decays over the course of AD (Hickman et al., 2008;  
61 Koellhoffer et al., 2017; Orre et al., 2014a; Solito and Sastre, 2012; Zuroff et al., 2017). Along these  
62 lines, A $\beta$  clearance was found reduced in sporadic AD and it is assumed to be a key factor in the  
63 pathogenesis (Mawuenyega et al., 2010; Saido, 1998; Wildsmith et al., 2013). Importantly,  
64 A $\beta$  clearance defects in AD microglia are reversible (Daria et al., 2017) and enhancing microglial  
65 phagocytic function has been explored as a therapeutic approach since substantial reduction of  
66 A $\beta$  burden appears to correlate with cognitive benefits (Bacsikai et al., 2001; Bard et al., 2000;  
67 Bohrmann et al., 2012; Janus et al., 2000; Lathuiliere et al., 2016; Morgan et al., 2000; Nicoll et al.,  
68 2006; Nicoll et al., 2003; Schenk et al., 1999; Schilling et al., 2018; Sevigny et al., 2016; Wilcock et  
69 al., 2004). However, when and how microglia change along AD progression is still not clear. Thus,  
70 understanding molecular alterations of microglia at different stages of AD is crucial and a pre-requisite  
71 for developing safe and efficacious therapy.

72 Transcriptional expression profiles for microglia were previously revealed under  
73 physiological, neurodegenerative or neuroinflammatory conditions (Butovsky et al., 2014; Galatro et  
74 al., 2017; Gosselin et al., 2017; Gotzl et al., 2019; Grabert et al., 2016; Holtzman et al., 2015; Kamphuis  
75 et al., 2016; Krasemann et al., 2017; Mazaheri et al., 2017; Orre et al., 2014a; Orre et al., 2014b; Wang  
76 et al., 2015; Yin et al., 2017). Transcriptional signatures were also recently reported at single-cell  
77 resolution, demonstrating regional and functional heterogeneity of brain myeloid cells (Hammond et  
78 al., 2019; Jordao et al., 2019; Keren-Shaul et al., 2017; Mathys et al., 2017; Sala Frigerio et al., 2019).  
79 In neurodegenerative mouse models, two major profiles have been proposed along the spectrum of

80 microglial alterations. One is the homeostatic microglial signature that occurs under physiological  
81 conditions and is characterized by the expression of several genes, including *P2ry12*, *Tmem119* and  
82 *Cx3cr1*. The other key signatures, referred to as disease-associated microglia (DAM), microglial  
83 neurodegenerative phenotype (MGnD) or activated response microglia (ARM) are observed under  
84 neurodegenerative conditions (Keren-Shaul et al., 2017; Krasemann et al., 2017; Sala Frigerio et al.,  
85 2019) and characterized by increased expression of *ApoE*, *Trem2*, *Cd68*, *Clec7a* and *Itgax* (*Cd11c*),  
86 among others. These changes were quantified using RNA transcripts, but transcript levels do not  
87 necessarily reflect protein levels which ultimately control cell function (Bottcher et al., 2019; Mrdjen  
88 et al., 2018; Sharma et al., 2015). Importantly, a recent study postulated that transcriptomic profiles  
89 of microglia from another AD mouse model (5xFAD) do not correlate well with proteomic changes  
90 (Rangaraju et al., 2018), suggesting the existence of additional translational or post-translational  
91 regulation mechanisms in AD microglia. Additionally, little is known about A $\beta$ -associated changes  
92 in the microglial proteome in a time-resolved manner, or which proteome alterations underscore  
93 microglial dysfunction. Accordingly, we analyzed the microglial proteome at distinct stages of  
94 A $\beta$  pathology in two commonly used mouse models of amyloidosis; the APPPS1 (Radde et al., 2006),  
95 and the APP-KI mice (Saito et al., 2014). In contrast to the APPPS1 mouse model that overexpresses  
96 mutated human amyloid precursor protein (APP) and presenilin-1 (PS1), the APP-KI model bears  
97 endogenous levels of APP with a humanized A $\beta$  sequence containing three AD mutations (NL-G-F),  
98 and has no alterations of PS1 (Radde et al., 2006; Saito et al., 2014).

99 Our study determines the proteome of microglia from APPPS1 and APP-KI mice in a time  
100 resolved manner, starting from pre-deposition to early, middle and advanced stages of amyloid  
101 deposition and reveals a panel of MARPs that progressively change throughout A $\beta$  accumulation.  
102 Although both mouse models display severe microglial alterations at late stages of A $\beta$  pathology, the  
103 occurrence of MARP signatures differs and appears earlier in the APPPS1 mice. Strikingly, the kinetic  
104 differences in proteomic profiles correlated with the presence of fibrillar A $\beta$ , rather than dystrophic  
105 neurites, suggesting that fibrillar A $\beta$  aggregates are the main drivers of the AD-associated microglial  
106 phenotype and corresponding functional decline. The time-resolved microglial profiles may serve as  
107 benchmark proteomic signatures for investigating novel microglial targets or monitoring the efficacy  
108 of future pre-clinical studies aiming at microglial repair.

109

110



111 **Results**

112 *APPPS1 microglia develop an AD-associated proteomic signatures earlier compared to the APP-*  
113 *KI microglia*

114 To facilitate proteomic analysis, we first optimized the microglial isolation procedure. CD11b positive  
115 microglia were isolated from mouse cerebrum using MACS technology. The purity of the CD11b-  
116 enriched fraction was controlled by fluorescence activated cell sorting (FACS), revealing that a 97%  
117 of isolated cells were CD11b positive (Suppl. Fig 1A). Of note, only 0.49% of CD11b positive cells  
118 were detected in the CD11b-depleted fraction (Suppl. Fig 1B), demonstrating high isolation  
119 efficiency. Next, we optimized the data acquisition method for microglial proteome analysis (Suppl.  
120 Fig 2A; Suppl. Table 1). Recently, it was shown that Data Independent Acquisition (DIA) for label-  
121 free quantification (LFQ) of proteins identifies and quantifies consistently more peptides and proteins  
122 across multiple samples, compared to Data Dependent Acquisition (DDA) (Bruderer et al., 2015).  
123 Thus, we first evaluated the performance of DDA vs. DIA (Suppl. Table 2) using microglial lysates  
124 from WT and APPPS1 mice. DDA identified 53912 peptides on average compared to 74281 peptides  
125 identified by DIA, representing a 37.8% increase in detection by DIA method (Suppl. Table 2).  
126 Overall, the main advantage of DIA was the improved consistency of protein quantifications among  
127 the replicates and the identification of proteins with lower abundance, leading to 29% increase of  
128 relatively quantified proteins from 4412 with DDA to 5699 with DIA (Suppl. Table 2; Suppl. Fig 2B  
129 and C). We therefore selected DIA for further proteomic characterization of APPPS1 and APP-KI  
130 microglia. Notably, we also detected a consistent relative quantification of proteins with an overlap  
131 of 93.5% between the two mouse models (Suppl. Fig 2D), supporting our selection of DIA as a robust  
132 method for microglial proteomic analysis.

133 Amyloid plaque deposits appear at similar ages (between 6-8 weeks) in APPPS1 and APP-KI  
134 mouse models (Radde et al., 2006; Saito et al., 2014). To reveal the dynamics of microglial proteomic  
135 alterations across different amyloid stages, we analyzed microglia from 1, 3, 6 and 12 month old  
136 APPPS1 and APP-KI mice and their corresponding age-matched wild-type (WT) mice (Suppl. Fig  
137 2A). For our proteomic analysis, we have set as a threshold a log<sub>2</sub> fold change larger than 0.5 or  
138 smaller than -0.5 compared to the WT with a p-value less than 0.05, and significance after False  
139 Discovery Rate (FDR) correction. No data imputation was performed.

140 According to A $\beta$  burden in both mouse models, we refer to one month of age as a pre-  
141 deposition stage, and to 3, 6 and 12 months of age as early, middle and advanced stages of amyloid  
142 pathology, respectively (Suppl. Fig 3). At the pre-deposition stage (1 month), microglial proteomes

143 of APPPS1 and APP-KI mice did not show significant alterations compared to WT (Fig 1A and B),  
144 demonstrating that microglia are not affected prior to development of A $\beta$  pathology. At 3 months of  
145 age, microglia in APPPS1 mice already displayed a significant up-regulation of 332 proteins and  
146 down-regulation of 678 proteins, compared to WT microglia (Fig 1C; Suppl. Table 3A). In contrast,  
147 APP-KI microglia were hardly affected at 3 months of age (Fig 1D; Suppl. Table 3B), which is  
148 particularly surprising because both mouse models show comparable amyloid burden at this stage  
149 (Suppl. Fig 3). At 6 months of age, microglia in APPPS1 mice displayed 309 up-regulated and 261  
150 down-regulated proteins, compared to WT microglia (Fig 1E; Suppl. Table 3A). In contrast to 3  
151 months of age (Fig 1D), APP-KI mice at 6 months of age displayed a substantial alteration of their  
152 microglial proteome, illustrated by 140 up-regulated and 151 down-regulated proteins (Fig 1F; Suppl.  
153 Table 3B). Still, microglial alterations in 6 month old APP-KI mice were less pronounced compared  
154 to the proteome of APPPS1 mice (Fig 1E and F). Noteworthy, by 12 months of age, APPPS1 microglia  
155 revealed a significant up-regulation of 776 proteins and down-regulation of 633 proteins, while APP-  
156 KI microglia displayed 704 up-regulated and 666 down-regulated proteins (Fig 1G and H; Suppl.  
157 Table 3A and B). This indicates comparable changes in APPPS1 and APP-KI mice at advanced stages  
158 of A $\beta$  pathology. Overall, our data show that amyloid plaque accumulation triggers microglial  
159 progression towards an AD-associated phenotype in both mouse models, but that response dynamics  
160 are different in APPPS1 and APP-KI microglia.

161

### 162 ***Identification of MARPs as signatures of early, middle and advanced amyloid stages***

163 Next, we determined protein alterations that first appear in early, middle or advanced stages of  
164 A $\beta$  deposition and remain altered throughout all analyzed stages, thus following amyloid accumulation.  
165 To this end, we selected the APPPS1 mouse model as a reference since it displays earlier changes and  
166 thus provides a better time resolution of protein alterations to amyloid response, compared to the APP-  
167 KI model (Fig 2A). Correspondingly, we defined early (proteins changed at 3, 6, and 12 months),  
168 middle (proteins changed only at 6 and 12 months) and advanced (proteins changed only at 12 months)  
169 MARPs. Only proteins with a consistent quantification in all samples of an age group were used for  
170 relative quantification. Furthermore, in order to determine robust and model-independent A $\beta$ -  
171 triggered microglial alterations, we only selected MARPs that were altered with a significantly  
172 changed abundance in both mouse models (even if in APP-KI microglia changes appear later). This  
173 analysis identified 90 early, 176 middle, and 435 advanced MARPs (Suppl. Fig 4A). The most  
174 strongly regulated MARPs with early, middle and advanced response are displayed in corresponding

175 heatmaps (Fig 2B-D). In addition, we compared MARP signatures with the previously delineated  
176 RNA signatures of 5xFAD mice (Keren-Shaul et al., 2017) to visualize the overlap, as well as  
177 differences, between proteomic and transcriptomic microglial profiles.

178 Early MARPs included several of the previously identified transcriptional DAM markers  
179 (Keren-Shaul et al., 2017) such as ITGAX (CD11c), APOE, CLEC7a, LGALS3 (Galectin-3) and  
180 CD68, which were found with an increased abundance (Fig 2B). Moreover, proteins involved in  
181 antigen presentation such as CD74, H2-D1, TAP2, TAPBP and H2-K1 were revealed as up-regulated  
182 early MARPs. In addition, we discovered prominent changes in interferon signaling represented by  
183 the up-regulation of early MARPs, including MND A, OAS1A, IFIT3, ISG15, GVIN1, STAT1 and 2  
184 (Fig 2B). Even though early MARPs were mainly up-regulated, we also identified early MARPs with  
185 a decreased abundance, including KRAS, a protein involved in cell proliferation and the endocytosis  
186 regulator EHD2 among others (Fig 2B). A gene ontology (GO) cluster enrichment analysis of early  
187 MARPs revealed that up-regulated proteins were enriched for immune and viral response, interferon  
188 beta and cytokine response, antigen processing and presentation as well as biotic and lipid response  
189 (Fig 3A; Suppl. Fig 5A und D). Thus, these processes represent first molecular alterations that  
190 progressively follow A $\beta$  plaque pathology.

191 The middle MARPs included the up-regulated proteins FABP3, FABP5, CD63, TREM2, MIF  
192 and GUSB (Fig 2C), demonstrating a progressive conversion of the microglial proteome towards a  
193 disease state that accompanies A $\beta$  accumulation. Importantly, middle MARPs also reveal down-  
194 regulation of the proposed homeostatic markers such as CX3CR1, TMEM119 and P2RY12 (Fig 2C).  
195 Among the down-regulated middle MARPs, we identified additional chemotaxis and cell migration  
196 related proteins like SYK, FER, CX3CL1, and BIN2 (Fig 2C; Suppl. Table 4), underscoring a loss of  
197 key homeostatic functions of microglia throughout AD progression.

198 Advanced MARPs represent proteins that were only altered upon extensive amyloid pathology  
199 and show a high correlation between the two models (Suppl. Fig 4B). This group included up-  
200 regulation of proteins involved in calcium ion binding such as NCAN, MYO5A, HPCAL4, TTYH1  
201 and GCA and down-regulation of proteins that play a role in the endocytosis/lysosomal system such  
202 as TFEB, TFE3 and BIN1 (Fig 2D; Suppl. Table 4). In addition, different G protein-coupled receptor  
203 signaling proteins, including GNG2, GNG5 and GNG10, also displayed a decreased abundance (Fig  
204 2D).

205 A GO cluster enrichment analysis of middle and advanced MARPs identified down-regulation  
206 of biological processes including cell motility, migration and chemotaxis, as well as cell development

207 and proliferation (Fig 3B and C; Suppl. Fig 5B, C, E and F). Conversely, we found an up-regulation  
208 of protein glycosylation and carbohydrate metabolism (Fig 3C; Suppl. Fig 5E and F). Additionally,  
209 alterations in ion transport processes involving ion homeostasis and pH regulation were also detected  
210 (Fig 3C). These findings indicate that after an initial inflammatory response, several cellular processes  
211 related to chemotaxis and phagocytosis are progressively dysregulated upon increased A $\beta$  deposition.

212 Importantly, our proteomic analysis also detected alterations in proteins related to different  
213 genetic risk factors of AD (Karch and Goate, 2015), including significantly increased levels of APOE,  
214 TREM2, and INPP5D, and decreased levels of PLCG2, ABI3, and BIN1 in both mouse models  
215 (Suppl. Table 5A and B).

216 The overlap of consistently quantified proteins and a previously published transcriptome study  
217 (Keren-Shaul et al., 2017) was 38.4%, whereas 2152 and 2841 gene products were only quantified on  
218 protein and transcript level, respectively (Suppl. Fig 4C). Single cell transcriptomics (Keren-Shaul et  
219 al., 2017) has demonstrated a similar regulation of a number of early MARPs while we found less  
220 overlap for middle and advanced MARPs (Fig 2B-D). We also identified proteins with an inverse  
221 regulation compared to transcriptomic signatures such as the early MARP RPL38, middle MARPs  
222 MCM3 and GFPT1 or advanced MARPs CDC88A, GALNT2, EIF4B and CHMP6 (Fig 2B-D; Suppl.  
223 Table 4). Furthermore, the advanced MARP HEXB showed a consistent up-regulation in our  
224 proteomic analysis, despite being previously anticipated as a homeostatic gene (Suppl. Table 4).

225 Overall, our study presents a robust and reliable method to track microglial proteome and  
226 provides a resource that maps changes in brain immunity during different phases of A $\beta$  accumulation.

227

### 228 ***Proteomic changes are detected in plaque-associated microglia***

229 Next, we validated proteomic changes by western blot analysis using isolated microglia from 12  
230 month old APPPS1 and APP-KI mice. This analysis confirmed the pronounced increase of the early  
231 MARPs APOE and CD68, the middle MARPs TREM2 and FABP5, as well as reduced levels of the  
232 middle MARP CSF1R (Suppl. Fig 4D) in both transgenic mouse models compared to WT mice.  
233 Furthermore, proteomic changes were also validated by immunohistochemistry in order to visualize  
234 spatial distribution of altered microglial proteins in APPPS1 and APP-KI mice. Immunohistological  
235 analysis of 3 month old APPPS1 mice already revealed increased immunoreactivity of selected  
236 MARPs such as CLEC7a (Fig 4), TREM2 (Suppl. Fig 6) and APOE (Suppl. Fig 7) that mark initial  
237 stages of microglial activation in AD. This increase was detected in IBA1 positive microglia that were  
238 clustering around amyloid plaques, but not in microglia further away from plaques and was – in

239 agreement with our proteomic data – less pronounced in 3 month old APP-KI mice. Accordingly, at  
240 12 months, both APPPS1 and APP-KI mice showed a similar increase in the levels of selected MARPs  
241 such as CLEC7a (Fig 5) and decreased levels of TMEM119 (Fig 6) compared to the WT mice, once  
242 again in microglia surrounding amyloid plaques. Taken together, we validated selected microglial  
243 proteomic alterations from our dataset by applying biochemical and immunohistochemical methods.  
244 In addition, we confirmed the kinetic differences in AD-associated proteomic signatures of APPPS1  
245 and APP-KI microglia. Our data suggest that interaction between microglia and A $\beta$  is likely triggering  
246 the proteomic changes as they could be observed in plaque-associated microglial population.

247

### 248 *APPPS1 and APP-KI mice show similar dynamics of amyloid plaque deposition, but differ in* 249 *plaque fibrillization*

250 The magnitude of proteomic microglial changes was found to correlate with A $\beta$  plaque accumulation  
251 throughout disease progression. However, the appearance of MARP signatures differed between the  
252 models and occurred earlier in the APPPS1 mice (Fig 1C and D; Fig 2A) despite the comparable  
253 plaque load observed in both mouse models (Suppl. Fig 3). Thus, it appears possible that the nature  
254 of amyloid plaques is different between the APPPS1 and APP-KI mice. To examine this, we analyzed  
255 amyloid plaques in 3, 6 and 12 month old APPPS1 and APP-KI mice by immunohistochemistry. We  
256 used the anti-A $\beta$  antibody NAB228 (Abner et al., 2018) to detect amyloid plaques, and Thiazine red  
257 to visualize fibrillar amyloid plaque cores (Daria et al., 2017) (Fig 7A). In agreement with amyloid  
258 plaque pathology reported in this model (Radde et al., 2006), APPPS1 mice contained fibrillar amyloid  
259 plaque cores already at 3 months of age. In contrast, fibrillar A $\beta$  was barely detectable in APP-KI  
260 mice at 3 months of age (Fig 7A). The amount of fibrillar A $\beta$  in APP-KI mice increased at 6 and 12  
261 months, but overall still remained lower compared to the APPPS1 mice. This result was also  
262 confirmed by biochemical analysis in which fibrillar A $\beta$  was specifically detected via immunoblot of  
263 the insoluble brain fraction (Fig 7B). Therefore, we excluded differences in the detection and binding  
264 properties of Thiazine red to be the underlying cause for the observed reduction in the levels of fibrillar  
265 A $\beta$  in APP-KI mice. Taken together, although immunohistochemistry revealed comparable  
266 A $\beta$  plaque coverage in APPPS1 and APP-KI mice, the amount of fibrillar A $\beta$  was significantly lower  
267 in APP-KI mice.

268

269

270 ***Microglial recruitment is triggered by fibrillar A $\beta$  and not by dystrophic neurites***

271 To determine what triggers microglial reactivity in AD, we first quantified microglial recruitment to  
272 A $\beta$  plaques in both mouse models. This analysis was done at the early pathological stage (3 months),  
273 where we identified prominent differences in the proteome regulation (Fig 1C and D; Fig 2A) as well  
274 as in the amount of fibrillar A $\beta$  (Fig 7A and B) between the two AD mouse models.  
275 Immunohistochemical analysis revealed IBA1 positive, amoeboid microglia recruited to large,  
276 Thiazine red positive, fibrillar A $\beta$  plaque cores in APPPS1 mice. Of note, we observed intracellular  
277 fibrillar A $\beta$  in APPPS1 microglia in close contact to the plaque core (Fig 8A) as previously reported  
278 (Bolmont et al., 2008). Despite the significantly smaller fibrillar A $\beta$  plaque core in APP-KI mice, we  
279 could observe IBA1 positive microglia polarized towards the fibrillar A $\beta$ , rather than to the  
280 surrounding non-fibrillar A $\beta$  positive material (Fig 8A). Quantification analysis revealed increased  
281 clustering of IBA1 positive microglia around A $\beta$  plaques in APPPS1 compared to the APP-KI mice  
282 (Fig 8B), which display overall larger A $\beta$  plaque size (Fig 8C). Likewise, we observed increased  
283 CD68 immunoreactivity around A $\beta$  plaques in the APPPS1 compared to the APP-KI mice (Fig 8D  
284 and E). However, CD68 signal per individual microglial cell in the plaque vicinity was similar in both  
285 models (Fig 8F), suggesting that differences in AD-associated microglial proteins are due to the  
286 number of recruited microglia rather than differences in their individual CD68 protein levels.

287 Besides A $\beta$ , microglial recruitment has also been associated with neuritic damage (dystrophic  
288 neurites) (Hemonnot et al., 2019). Accordingly, we analyzed dystrophic neurite pathology in 3 month  
289 old APPPS1 and APP-KI mice, using an antibody against APP that accumulates in these structures  
290 (Cummings et al., 1992; Sadleir et al., 2016). As previously reported (Radde et al., 2006), amyloid  
291 plaques in the APPPS1 mice were surrounded by prominent dystrophic neurites (Fig 8G).  
292 Interestingly, despite the reduced load of fibrillar A $\beta$ , we readily detected dystrophic neurites in the  
293 APP-KI mice (Fig 8G). Moreover, our quantification analysis revealed a trend towards an increased  
294 dystrophic neurite area in the APP-KI compared to the APPPS1 mice (Fig 8H). Therefore, the  
295 differences in early microglial recruitment to APPPS1 plaques and the consecutive proteomic changes  
296 are less likely to be triggered by dystrophic neurites.

297 Altogether, we hypothesize that microglial recruitment is primarily triggered by the fibrillar  
298 A $\beta$  content of amyloid plaques which drives the acquisition of MARP signatures.

299  
300



### 301 ***Phagocytic impairments correlate with the occurrence of MARP signatures***

302 The differences observed in the dynamics of microglial response to amyloid in the APPPS1 and the  
303 APP-KI mice prompted us to examine the association between microglial phagocytic function and the  
304 appearance of MARP signatures. To this end, we assessed the phagocytic capacity of microglia from  
305 3 and 6 month old APPPS1 and APP-KI mice compared to the corresponding age-matched WT  
306 microglia using the *E.coli*-pHrodo uptake assay (Gotz et al., 2019; Kleinberger et al., 2014). We  
307 already detected phagocytic dysfunction in 3 month old APPPS1 microglia, which was reflected by a  
308 prominent decrease in the amount of intracellular *E.coli* particles (Fig 8I; Suppl. Fig 8A) and a reduced  
309 number of CD11b positive cells that were capable of *E.coli* uptake (Fig 8J; Suppl. Fig 8B). Notably,  
310 APPPS1 phagocytic impairment did not change further in 6 month old microglia, suggesting that  
311 microglial functional deficits, as measured by the *E.coli* uptake assay, were fully established already  
312 at 3 months of age and characterized by early MARPs. In contrast, APP-KI microglia remained  
313 functional at 3 months, but at 6 months displayed similar impairments as seen in APPPS1 microglia  
314 (Fig 8I and J). Overall, we observed different kinetics of microglial dysfunction among mouse models  
315 which correlate with the appearance of MARPs and, in turn, with the presence fibrillar A $\beta$ .

### 316 317 **Discussion**

318  
319 This study presents an in-depth and time-resolved proteome of microglia isolated across different  
320 stages of A $\beta$  accumulation in the APPPS1 and APP-KI mouse models, resulting in the identification  
321 of early, middle, and advanced MARPs. Importantly, we demonstrated that the structure of amyloid  
322 plaques (fibrillar *versus* non-fibrillar) is a major determinant driving the molecular alterations of  
323 microglia. Key microglial signatures encompass proteins with a central function in microglial biology  
324 and AD pathogenesis. Moreover, our functional analysis shows that early MARP signatures already  
325 reflect microglial phagocytic dysfunction.

326 To achieve robust and reproducible relative quantification of microglial proteins from single  
327 mice, we improved the yield of acutely isolated microglia to an average of  $2 \times 10^6$  cells per mouse  
328 brain, compared to recently published protocols (Flowers et al., 2017; Rangaraju et al., 2018). Next,  
329 by establishing the more sensitive DIA method for protein quantification, we improved the number of  
330 consistently identified proteins by 29.3% and obtained on average 5699 (APPPS1) and 5698 (APP-  
331 KI) relatively quantified proteins. Notably, our analysis enhanced the detection of low abundance  
332 proteins and does not require data imputation. The advancement to previous studies (Rangaraju et al.,  
333 2018; Sharma et al., 2015) is also exemplified by quantification of membrane proteins, including well



334 known microglial homeostatic markers TMEM119 or P2RY12. We also measured alterations in  
335 proteins that were postulated to be only altered at the transcriptional level in AD microglia (Rangaraju  
336 et al., 2018), including up-regulation of middle MARPs FABP3, FABP5, MIF and PLP2. In summary,  
337 our study achieved a major improvement in quantitative proteomic analysis of rodent microglia  
338 (Flowers et al., 2017; Rangaraju et al., 2018; Thygesen et al., 2018). This methodological advance  
339 enabled us to map microglial changes across diverse stages of A $\beta$  pathology in two widely explored  
340 pre-clinical models of amyloidosis. Generated proteomic profiles characterize microglia under  
341 diseased conditions and can be used as a resource to track changes upon microglial therapeutic  
342 modification, such as A $\beta$  immunotherapy. Such studies would facilitate discovery of clinically  
343 relevant molecular alterations that are necessary for microglial functional repair, monitoring disease  
344 progression and therapeutic efficacy.

345 The TREM2/APOE axis plays a key role in the regulation of the microglial transcriptional  
346 program and guides the homeostatic/DAM signature switch (Jay et al., 2017; Keren-Shaul et al., 2017;  
347 Krasemann et al., 2017). Our time-resolved proteomic analysis observed major rearrangements of the  
348 microglial proteomic landscape in both APPPS1 and APP-KI mice and revealed a partial overlap  
349 between MARPs and transcriptional profiles of DAM and homeostatic microglia (Keren-Shaul et al.,  
350 2017), but also identified additional microglial marker proteins throughout different stages of  
351 A $\beta$  deposition.

352 Early MARPs include proteins of the interferon response, which is consistent with the recently  
353 identified interferon-responsive microglial sub-population in AD mice (Sala Frigerio et al., 2019).  
354 Numerous up-regulated early MARPs, including CD74, CTSZ, HEXA, CTSH, GLB1, CD68, NPC2,  
355 CLN3 and PI4K2A, reflect alterations in endo-lysosomal homeostasis as an early pathological insult  
356 in AD microglia (Van Acker et al., 2019). Additionally, factors of the fatty acid and cholesterol  
357 metabolism are altered throughout all pathological phases. Up-regulated are the early (APOE,  
358 ACACA, and SOAT1) middle (FABP3, FABP5, NCEH1, APOD, AACs, ACOX3, HACD2) and  
359 advanced MARPs (ACOT11, ACSBG1, ECHS1, ELOVL1, and FASN) and down-regulated are  
360 several middle and advanced MARPs (NAAA, FAM213B, HPGD, HPGDS, and PRKAB1), linking  
361 microglial lipid dyshomeostasis and AD pathology.

362 An inflammatory response in AD is suggested by the significant up-regulation of early MARPs  
363 LGALS3 and its binding protein (LGALS3BP). Recent findings suggested that the LGALS3/TREM2  
364 signalling pathway, that acts as an inflammatory regulator of amyloid plaque formation, may also be  
365 of relevance for AD pathology in humans (Boza-Serrano et al., 2019). Further evidence that some of

366 the presented proteomic alterations of rodent microglia may be relevant for human disease is given by  
367 the detection of up-regulated early/middle microglial MARPs, including CD68, TREM2 and ITGAX  
368 in microglia surrounding amyloid plaques in postmortem AD brains (Hopperton et al., 2018). As  
369 microglia emerge as a promising therapeutic target in AD, additional MARP signatures should be  
370 validated in human tissue. In particular, early MARPs that are strongly increased in both AD mouse  
371 models may serve as a resource to identify novel AD biomarkers and more specific microglial positron  
372 emission tomography (PET) tracers that are urgently needed to monitor microglial reactivity *in vivo*  
373 (Edison et al., 2018; Hemonnot et al., 2019). Middle and late MARPs reveal a decrease of microglial  
374 homeostatic functions affecting chemotaxis, cell migration and phagocytosis (e.g., CX3CR1, SYK,  
375 P2RY12, BIN2, TFEB and TFE3) and thus mark AD progression.

376 It is still being discussed which is the main trigger for microglial recruitment to amyloid  
377 plaques and their molecular switch from a homeostatic to a neurodegenerative phenotype (Hemonnot  
378 et al., 2019; Jung et al., 2015; Krasemann et al., 2017). Our study proposes that microglial recruitment  
379 to A $\beta$  deposits and their corresponding disease-associated proteomic alterations are triggered by  
380 fibrillar A $\beta$ , rather than by dystrophic neurites. We observed more diffuse amyloid plaque  
381 morphology with less fibrillar A $\beta$  and prominent neuritic dystrophies in the APP-KI mice. Similar  
382 plaque morphology, with less fibrillar A $\beta$ , is also observed in AD mice deficient for TREM2 or APOE  
383 that also have less microglial cells recruited to amyloid plaques and display prominent neuritic  
384 dystrophies (Parhizkar et al., 2019; Sala Frigerio et al., 2019; Ulrich et al., 2018; Wang et al., 2015;  
385 Yuan et al., 2016). APOE may have a dual role and control the transcriptional/translational response  
386 of microglia to amyloid as well as amyloid plaque compactness that directs microglial recruitment  
387 and thus creates a regulatory feedback-loop. These findings are also strengthened by the relevance of  
388 *ApoE* and *Trem2* as genetic risk factors of AD (Karch and Goate, 2015). Fibrillar A $\beta$  as the trigger  
389 for microglial recruitment is also supported by the human pathology where neuritic plaques in AD  
390 brains were found surrounded by microglia. In contrast, microglial clustering was not detected at  
391 diffuse plaques lacking fibrillar A $\beta$  core (D'Andrea et al., 2004).

392 Although DAM signatures have been suggested as a protective response, there is still a lack of  
393 direct experimental evidence linking specific transcriptomic or proteomic profiles to improved  
394 microglial function. Importantly, our study demonstrates a functional link between proteomic changes  
395 and reduced phagocytosis by AD microglia. APPPS1 microglia start acquiring early MARPs at the  
396 age of 3 months, which is already accompanied by reduced phagocytic function. In contrast, less  
397 altered proteomic signatures of 3 month old APP-KI microglia correlated with preserved phagocytic

398 function. Pronounced MARP signatures that appeared later in APP-KI microglia (6 months) were  
399 subsequently in accordance with phagocytic impairments. Therefore, differences in plaque  
400 fibrillization in both mouse models did not only affect microglial recruitment and activation, but also  
401 the phagocytic function of microglia.

402 Reduced phagocytosis of AD microglia might be related to observed proteomic alterations in  
403 lysosomal proteins or cell receptors. TREM2, which was found to be increased in both mouse models,  
404 plays an important role in phagocytosis as mutations of TREM2 related to AD and FTLD impair  
405 phagocytic activity of microglia (Kleinberger et al., 2014). However, up-regulation of the  
406 TREM2/APOE axis involves up-regulation of many lysosomal proteins (e.g., cathepsins or CD68)  
407 that are part of MARPs and altered in APPPS1 and APP-KI microglia. This may reflect a  
408 compensatory mechanism initiated as a response of microglia to A $\beta$  accumulation in order to enhance  
409 phagocytic function. Eventually this frustrated microglial response fails to translate into improved A $\beta$   
410 clearance capability.

411 Phagocytosis might also be altered through differential regulation of toll like receptors (TLR).  
412 Among the TLRs, TLR2, an A $\beta$  binding receptor (Liu et al., 2012; McDonald et al., 2016), showed  
413 the strongest increase with age while TLR9 was significantly reduced in APPPS1 and APP-KI mice.  
414 Along these lines, TLR2 deficiency reduced the inflammatory response of microglia to A $\beta$ 42, but  
415 increased A $\beta$  phagocytosis in cultured microglia (Liu et al., 2012) while TLR9 is associated with  
416 improved A $\beta$  clearance (Scholtzova et al., 2009). Thus, differential regulation of TLRs might  
417 contribute to the reduced phagocytic activity of aged APPPS1 microglia (Daria et al., 2017).

418 Additionally, many purinergic receptors (e.g., P2RX7, P2RY12 or P2RY13), which are  
419 important regulators of chemotaxis, phagocytosis, membrane polarization, and inflammatory  
420 signaling and thus emerged as possible microglial targets in AD (Calovi et al., 2019; Hemonnot et al.,  
421 2019), were found to be down-regulated in both AD mouse models. P2RY12 is regarded as a marker  
422 for ramified non-inflammatory microglia (Mildner et al., 2017) that is reduced in response to A $\beta$   
423 plaques and therefore represents a homeostatic microglial marker (Keren-Shaul et al., 2017;  
424 Krasemann et al., 2017). In contrast, P2RX4, a purinergic receptor that is likely to be involved in  
425 shifting microglia towards a pro-inflammatory phenotype (Calovi et al., 2019) or myelin phagocytosis  
426 (Zabala et al., 2018) had an increased abundance in both AD models. Taken together, our data  
427 emphasize alterations of purinergic receptor signaling in AD microglia that may regulate a  
428 morphological change towards amoeboid microglia with reduced motility and increased pro-  
429 inflammatory activity.

430 Our study confirms that both mouse models are valuable tools for studying A $\beta$ -induced  
431 pathological changes of microglia that are remarkably comparable at advanced stages of amyloidosis.  
432 However, the observed differences in the dynamics of early, middle and late MARPs in APPPS1 and  
433 APP-KI mice should be considered for the design of pre-clinical studies of microglial repair and will  
434 require different time windows for microglial modulation.

435 In conclusion, we tracked pathological alterations of microglia in two AD mouse models using  
436 a proteomic approach. Our work demonstrates that microglial alterations are triggered as a response  
437 to A $\beta$  deposition as pre-deposition stages do not reveal proteomic alterations. The conversion to  
438 MARPs is supported by changes in TREM2-APOE regulation mechanism. AD microglia display  
439 pronounced interferon stimulation, increased antigen presentation, alterations in cell surface receptors,  
440 lipid homeostasis and metabolism. Those proteomic changes in microglia occur as a response to  
441 fibrillar A $\beta$  and are reflected in amoeboid microglial morphology and impaired phagocytic capacity.  
442 Finally, our proteomic dataset serves a valuable research resource providing information on microglial  
443 alterations over different stages of A $\beta$  deposition that can be used to monitor therapeutic efficacy of  
444 microglial repair strategies.

## 445 **Materials and Methods**

### 446 ***Animals***

448 Male and female mice of the hemizygous APPPS1 mouse line overexpressing human APP<sub>KM670/671NL</sub>  
449 and PS1<sub>L166P</sub> under the control of the Thy-1 promoter (Radde et al., 2006), homozygous *App*<sup>NL-G-F</sup>  
450 mouse line (Saito et al., 2014) and the C57BL/6J (WT) line were used in this study. Mice were group  
451 housed under specific pathogen-free conditions. Mice had access to water and standard mouse chow  
452 (Ssniff® Ms-H, Ssniff Spezialdiäten GmbH, Soest, Germany) *ad libitum* and were kept under a 12/12  
453 h light-dark cycle in IVC System Typ II L-cages (528 cm<sup>2</sup>) equipped with solid floors and a layer of  
454 bedding. All animal experiments were performed in compliance with the German animal welfare law  
455 and have been approved by the government of Upper Bavaria.

456

### 457 ***Isolation of primary microglia***

458 Primary microglia were isolated from mouse brains (cerebrum) using MACS Technology (Miltenyi  
459 Biotec) according to manufacturer's instructions and as previously described (Daria et al., 2017).  
460 Briefly, olfactory bulb, brain stem and cerebellum were removed and the remaining tissue (cerebrum)  
461 was freed from meninges and dissociated by enzymatic digestion using a Neural Tissue Dissociation

462 Kit P (Miltenyi Biotec). Subsequently, mechanical dissociation was performed by using 3 fire-  
463 polished glass Pasteur pipettes of decreasing diameter. CD11b positive microglia were magnetically  
464 labelled using CD11b MicroBeads, loaded onto a MACS LS Column (Miltenyi Biotec) and subjected  
465 to magnetic separation, resulting in CD11b-enriched (microglia-enriched) and CD11b-depleted  
466 (microglia-depleted) fractions. Obtained microglia-enriched pellets were either washed twice with  
467 HBSS (Gibco) supplemented with 7 mM HEPES, frozen in liquid nitrogen and stored at -80°C for  
468 biochemical or mass spectrometry analysis or resuspended in microglial culturing media and used for  
469 phagocytosis assay as described below.

470

#### 471 ***Sample preparation for mass spectrometry***

472 Microglia-enriched pellets were lysed in 200  $\mu$ L of STET lysis buffer (50 mM Tris, 150 mM NaCl, 2  
473 mM EDTA, 1% Triton, pH 7.5) at 4°C with intermediate vortexing. The samples were centrifuged for  
474 5 min at 16000 x g at 4°C to remove cell debris and undissolved material. The supernatant was  
475 transferred to a LoBind tube (Eppendorf) and the protein concentration estimated using the Pierce 660  
476 nm protein assay (ThermoFisher Scientific). A protein amount of 15  $\mu$ g was subjected to tryptic  
477 protein digestion applying the the filter aided sample preparation protocol (FASP) (Wisniewski et al.,  
478 2009) using Vivacon spin filters with a 30 kDa cut-off (Sartorius). Briefly, proteins were reduced with  
479 20 mM dithiothreitol and free cystein residues were alkylated with 50 mM iodoacetamide (Sigma  
480 Aldrich). After the urea washing steps, proteins were digested with 0.3  $\mu$ g LysC (Promega) for 16 h  
481 at 37°C followed by a second digestion step with 0.15  $\mu$ g trypsin (Promega) for 4 h at 37°C. The  
482 peptides were eluted into collection tubes and acidified with formic acid (Sigma Aldrich). Afterwards,  
483 proteolytic peptides were desalted by stop and go extraction (STAGE) with self-packed C18 tips  
484 (Empore C18 SPE, 3M) (Rappsilber et al., 2003). After vacuum centrifugation, peptides were  
485 dissolved in 20  $\mu$ L 0.1% formic acid (Biosolve) and indexed retention time peptides were added (iRT  
486 Kit, Biognosys).

487

#### 488 ***Liquid chromatography – tandem mass spectrometry analysis***

489 For LFQ of proteins, peptides were analyzed on an Easy nLC 1000 or 1200 nanoHPLC (Thermo  
490 Scientific) which was coupled online via a Nanospray Flex Ion Source (Thermo Sientific) equipped  
491 with a PRSO-V1 column oven (Sonation) to a Q-Exactive HF mass spectrometer (Thermo Scientific).  
492 An amount of 1.3  $\mu$ g of peptides was separated on in-house packed C18 columns (30 cm x 75  $\mu$ m ID,  
493 ReproSil-Pur 120 C18-AQ, 1.9  $\mu$ m, Dr. Maisch GmbH) using a binary gradient of water (A) and

494 acetonitrile (B) supplemented with 0.1% formic acid (0 min., 2% B; 3:30 min., 5% B; 137:30 min.,  
495 25% B; 168:30 min., 35% B; 182:30 min., 60% B) at 50°C column temperature.

496 For DDA, full MS scans were acquired at a resolution of 120000 (m/z range: 300-1400; AGC target:  
497 3E+6). The 15 most intense peptide ions per full MS scan were selected for peptide fragmentation  
498 (resolution: 15000; isolation width: 1.6 m/z; AGC target: 1E+5; NCE: 26%). A dynamic exclusion of  
499 120 s was used for peptide fragmentation.

500 For DIA, one scan cycle included a full MS scan (m/z range: 300-1400; resolution: 120000; AGC  
501 target: 5E+6 ions) and 25 MS/MS scans covering a range of 300-1400 m/z with consecutive m/z  
502 windows (resolution: 30000; AGC target: 3E+6 ions; Suppl. Table 1). The maximum ion trapping  
503 time was set to “auto”. A stepped normalized collision energy of 26% ± 2.6% was used for  
504 fragmentation.

505 Microglia from APPPS1 mice were analyzed using DDA and DIA for method establishment.  
506 Microglia from APPPS1 and APP-KI mice were compared using DIA as it outperformed DDA.

507

#### 508 ***Mass spectrometric LFQ and data analysis***

509 For data acquired with DDA, the data was analyzed with the software Maxquant (maxquant.org, Max-  
510 Planck Institute Munich) version 1.6.1.0 (Cox et al., 2014). The MS data was searched against a  
511 reviewed canonical fasta database of *Mus musculus* from UniProt (download: November the 1<sup>st</sup> 2017,  
512 16843 entries) supplemented with the sequence of human APP with the Swedish mutant and the iRT  
513 peptides. Trypsin was defined as a protease. Two missed cleavages were allowed for the database  
514 search. The option first search was used to recalibrate the peptide masses within a window of 20 ppm.  
515 For the main search peptide and peptide fragment mass tolerances were set to 4.5 and 20 ppm,  
516 respectively. Carbamidomethylation of cysteine was defined as static modification. Acetylation of the  
517 protein N-term as well as oxidation of methionine was set as variable modification. The FDR for both  
518 peptides and proteins was set to 1%. The “match between runs” option was enabled with a matching  
519 window of 1.5 min. LFQ of proteins required at least one ratio count of unique peptides. Only unique  
520 peptides were used for quantification. Normalization of LFQ intensities was performed separately for  
521 the age groups because LC-MS/MS data was acquired in different batches.

522 A spectral library was generated in Spectronaut (version 12.0.20491.11, Biognosys) (Bruderer et al.,  
523 2015) using the search results of Maxquant of the APPPS1 dataset. The library includes 122542  
524 precursor ions from 91349 peptides, which represent 6223 protein groups. The DIA datasets of both  
525 mouse models were analyzed with this spectral library (version 12.0.20491.14.21367) with standard



526 settings. Briefly, the FDR of protein and peptide identifications was set to 1%. LFQ of proteins was  
527 performed on peptide fragment ions and required at least one quantified peptide per protein. Protein  
528 quantification was performed on maximum three peptides per protein group. The data of APPPS1  
529 microglia was organized in age dependent fractions to enable separate normalization of the data. All  
530 LC-MS/MS runs of the APP-KI dataset were normalized against each other because all samples were  
531 analyzed in randomized order in one batch.

532 The protein LFQ reports of Maxquant and Spectronaut were further processed in Perseus (Tyanova et  
533 al., 2016). The protein LFQ intensities were log<sub>2</sub> transformed and log<sub>2</sub> fold changes were calculated  
534 between transgenic and wild type samples separately for the different age groups and mouse models.  
535 Only proteins with a consistent quantification in all samples of an age group were considered for  
536 statistical testing. A two-sided Student's t-test was applied to evaluate the significance of proteins  
537 with changed abundance. Additionally, a permutation based FDR estimation was used (Tusher et al.,  
538 2001). A log<sub>2</sub> fold change larger than 0.5, or smaller than -0.5, a p-value less than 0.05, and significant  
539 regulation after FDR filtering were defined as regulation thresholds. The same thresholds were used  
540 for the comparison with transcriptomics data.

541 Gene ontology enrichment analysis was performed with the web-tool DAVID (version 6.8) (Huang  
542 da et al., 2009a, b) using GO\_FAT terms. Up- and down-regulated early, middle and advanced  
543 MARPs were clustered separately for biological process, cellular component, and molecular function  
544 with all 5500 proteins, consistently quantified in APPPS1 and APP-KI microglia, as a customized  
545 background. A medium classification stringency was applied. An enrichment score of 1.3 was defined  
546 as threshold for cluster enrichment.

547

#### 548 ***Biochemical characterization of brain tissue and isolated microglia***

549 RIPA lysates were prepared from brain hemispheres, centrifuged at 100000 x g (60 min at 4°C) and  
550 the remaining pellet was homogenized in 0.5 mL 70% formic acid. The formic acid fraction was  
551 neutralized with 20 x 1 M Tris-HCl buffer at pH 9.5 and used for A $\beta$  analysis. For A $\beta$  detection,  
552 proteins were separated on Tris-Tricine (10-20%, Thermo Fisher Scientific) gels, transferred to  
553 nitrocellulose membranes (0.1  $\mu$ m, GE Healthcare) which were boiled for 5 min in PBS and  
554 subsequently incubated with the blocking solution containing 0.2% I-Block (Thermo Fisher  
555 Scientific) and 0.1% Tween 20 (Merck) in PBS for 1 hour, followed by overnight incubation with  
556 rabbit polyclonal 3552 antibody (1:2000, (Yamasaki et al., 2006)). Antibody detection was performed



557 using the corresponding anti-HRP conjugated secondary antibody (Santa Cruz) and  
558 chemiluminescence detection reagent ECL (Thermo Fisher Scientific).  
559 Microglia-enriched pellets were resuspended in 100  $\mu$ L of STET lysis buffer (composition as  
560 described above for mass spectrometry, supplemented with proteinase and phosphatase inhibitors),  
561 kept on ice for 20 min and then sonicated for 4 cycles of 30 seconds. Cell lysates were then  
562 centrifugated at 9600 x g (5 min. at 4°C) and pellets discarded. Protein concentration was quantified  
563 using Bradford assay (Biorad) according to manufacturer instructions. 10  $\mu$ g per sample using two  
564 independent microglial lysates per genotype were loaded on a bis-tris acrylamide gel (8% or 12%)  
565 and subsequently blotted onto either a PVDF or nitrocellulose membrane (Millipore) using the  
566 following antibodies: TREM2 (1:10, clone 5F4,(Xiang et al., 2016)); APOE (1:1000, AB947  
567 Millipore); CD68 (1:1000, MCA1957GA, AbDserotec); CSF1R (1:1000, 3152, Cell Signaling) and  
568 FABP5 (1:400, AF1476, R&DSystems). Blots were developed using horseradish peroxidase-  
569 conjugated secondary antibodies (Promega) and the ECL chemiluminescence system (Amersham) or  
570 SuperSignal™ West Pico PLUS (Thermo Scientific). An antibody against GAPDH (1:2000, ab8245,  
571 Abcam) was used as loading control.

572

### 573 ***Immunohistochemistry***

574 3 and 12 month old mice from the APPPS1 and APP-KI transgenic lines were anesthetized i.p. with  
575 a mixture of Ketamine (400 mg/kg) and Xylazine (27 mg/kg) and transcardially perfused with cold  
576 0.1M PBS for 5 minutes followed by 4% Paraformaldehyde (PFA) in 0.1 M PBS for 15 minutes.  
577 Brains were isolated and postfixed for 20 minutes in 4% PFA in 0.1 M PBS and transferred to 30%  
578 sucrose in 0.1 M PBS for cryopreservation. Brains were embedded in optimal cutting temperature  
579 compound (O.C.T./ Tissue-Tek, Sakura), frozen on dry ice and kept at -80°C until sectioning. 30  $\mu$ m  
580 coronal brain sections were cut using a cryostat (CryoSTAR NX70, Thermo Scientific) and placed in  
581 0.1 M PBS until staining. Alternatively, sections were kept in anti-freezing solution (30% Glycerol,  
582 30% Ethylenglycol, 10% 0.25 M PO<sub>4</sub> buffer, pH 7.2-7.4 and 30% dH<sub>2</sub>O) at -20°C and briefly washed  
583 in 0.1M PBS before staining. Briefly, free-floating sections were permeabilized with 0.5% Triton-  
584 PBS (PBS-T) for 30 min, blocked either in 5% normal Goat Serum or 5% Donkey Serum in PBS-T  
585 for 1 hour and incubated overnight at 4°C in blocking solution with the following primary antibodies:  
586 IBA1 (1:500, 019-19741,Wako), IBA1 (1:500, ab5076, Abcam) NAB228 (1:2000, sc-32277, Santa  
587 Cruz), CD68 (1:500, MCA1957GA, AbDserotec), TREM2 (1:50, AF1729, R&DSystems), APP-  
588 Y188 (1:2000, ab32136, Abcam), CLEC7a (1:50, mabg-mdect, Invivogen), TMEM119 (1:200,

589 ab209064, Abcam), APOE-biotinylated (HJ6.3, 1:100, (Kim et al., 2012)) and 3552 (1:5000,  
590 (Yamasaki et al., 2006)). After primary antibody incubation, brain sections were washed 3 times with  
591 PBS-T and incubated with appropriate fluorophore-conjugated or streptavidine-fluorophore  
592 conjugated (for APOE biotinylated antibody) secondary antibodies (1:500, Life Technologies)  
593 together with nuclear stain Hoechst 33342 (1:2000, H3570, ThermoFisher), for two hours at room  
594 temperature (RT). Fibrillar dense core plaques were stained with Thiazine red (Sigma Aldrich, 2  $\mu$ M  
595 solution in PBS) for 20 min in the dark at RT (after secondary antibody staining). Sections were  
596 subsequently washed three times with PBS-T mounted onto glass slides (Thermo Scientific), dried in  
597 the dark for at least 30 min, mounted using Gel Aqua Mount media (Sigma Aldrich) and analyzed by  
598 confocal microscopy.

### 599 *Image acquisition, analysis and quantifications*

600 3 month old APPPS1 and APP-KI mice were used for the analysis of dystrophic neurites, microglial  
601 recruitment to amyloid plaques and CD68 coverage area. All quantification analysis included 3 mice  
602 per genotype. 30 z-stack images (~10  $\mu$ m thick) of single cortical plaques were acquired per  
603 experiment using a confocal microscope (63X water objective with 2x digital zoom, 600 Hz, Leica  
604 TCS SP5 II) from 6 brain slices (5 plaques per slice) for the microglial recruitment and dystrophic  
605 neurite analysis, or from 3 brain slices (10 plaques per slice) for CD68 coverage area analysis.  
606 Microscopy acquisition settings were kept constant within the same experiment. Maximal intensity  
607 projection pictures from every z-stack were created using ImageJ software and for every image, a  
608 defined region of interest (ROI) was manually drawn around every plaque (including microglia  
609 recruited -in contact- to the plaque). APP (Y188 antibody) and CD68 coverage area were quantified  
610 using the “Threshold” and “Analyze Particles” (inclusion size of 1-Infinity) functions from ImageJ  
611 software (NIH) within the ROI. The area covered by CD68 was normalized to the total A $\beta$  plaque  
612 area (NAB228 antibody) or was divided by the number of microglia (IBA1 positive cells) recruited  
613 to the plaque within the ROI. The absolute values of area covered by neuritic dystrophies or A $\beta$   
614 plaques are represented in square micrometers ( $\mu$ m<sup>2</sup>). Microglial recruitment to plaques was quantified  
615 by counting the number of microglia (IBA1 positive cells) around amyloid plaques through the z-  
616 stack images within the defined ROI using the cell counter function of ImageJ software. Number of  
617 microglial cells at amyloid plaques was normalized to the area covered by A $\beta$  (NAB228 antibody)  
618 and expressed as number of microglial cells per  $\mu$ m<sup>2</sup> of A $\beta$  plaque.

619 Representative images from microglial recruitment analysis (IBA1 positive cells and CD68 coverage)  
620 were taken using the confocal microscope (63X water objective with 2x digital zoom, 400 Hz, Leica  
621 TCS SP5 II). Representative picture of microglia polarized towards amyloid cores was taken using a  
622 63X confocal water objective with 3x digital zoom.

623 For immunohistological validation of the proteome analysis and amyloid pathology, representative  
624 pictures in similar regions were taken by confocal microscopy using the same settings for all three  
625 different genotypes (WT, APPPS1 and APP-KI). Low magnification pictures were taken with 20X  
626 dry confocal objective with 2x digital zoom and higher magnification ones with 63X confocal water  
627 objective with 3x digital zoom. Images of A $\beta$  pathology (NAB228 antibody) were taken with a tile  
628 scan system covering similar brain regions (10X confocal dry objective). Representative images of  
629 A $\beta$  composition (NAB228, ThR and IBA1) were taken with a confocal 20X dry objective.

630

### 631 ***Microglial phagocytosis of E.coli particles***

632 Microglial phagocytosis was performed similarly as previously described (Kleinberger et al., 2014).  
633 Microglia isolated from 3 or 6 month old APPPS1, APP-KI and WT mice were plated onto 24 well  
634 plate at a density of  $2 \times 10^5$  cells per well and cultured for 24 hours in a humidified 5% CO<sub>2</sub> incubator  
635 at 36.5°C in DMEM/F12 media (Invitrogen) supplemented with 10% heat inactivated FCS (Sigma),  
636 1% Penicillin-Streptomycin (Invitrogen) and 10 ng/mL GM-CSF (R&DSystems). After 24 hours,  
637 plating media were replaced with fresh media. After 5 days in culture, microglia were incubated with  
638 50  $\mu$ L of *E.coli* particle suspension (pHrodo™ Green *E.coli* BioParticles™, P35366, Invitrogen™)  
639 for 60 min. Cytochalasin D (CytoD, 10  $\mu$ M, from 10 mM stock in DMSO) was used as phagocytosis  
640 inhibitor and added 30 min prior to addition of bacterial particles. Bacteria suspension excess was  
641 washed 4 times with PBS (on ice) and microglia that were attached to the plate were incubated with  
642 CD11b-APC-Cy7 antibody (1:200, clone M1/70, 557657, BD) in FACS buffer (PBS supplemented  
643 with 2mM EDTA and 1% FBS) for 30 min at 4°C. Microglia were then washed twice with PBS,  
644 scraped off the wells in FACS buffer and analyzed by flow cytometry. For the analysis of 3 month  
645 old mice, 3 independent experiments were performed per genotype, and each experiment included a  
646 minimum of 3 technical replicates with the exception of CytoD condition (2 technical replicates). For  
647 the analysis of 6 month old mice, 2 independent experiments were performed per genotype, and each  
648 experiment included a minimum of 4 technical replicates with the exception of CytoD condition (2  
649 technical replicates).

650

651 ***FACS analysis***

652 For the microglial isolation quality control, around 12000 cells from a CD11b-enriched and CD11b-  
653 depleted fractions were stained in suspension with CD11b-APC-Cy7 antibody (1:200, clone M1/70,  
654 557657, BD) in FACS buffer for 30 minutes at 4°C. After several washes with PBS, microglia were  
655 resuspended in FACS buffer for analysis. Propidium Iodide (PI) staining was done 10 minutes prior  
656 FACS analysis. Flow cytometric data was acquired on a BD FACSverse flow cytometer by gating  
657 according to single stained and unstained samples and analyzed using FlowJo software (Treestar).  
658 Mean fluorescent intensity (MFI) is represented as the geometric mean of the according fluorochrome.

659

660 ***Statistical analysis***

661 The data are presented as mean  $\pm$  standard deviation of the mean ( $\pm$  SD) from 3 independent  
662 experiments with the exception of the phagocytic assay in 6 month old mice (Fig 8) were 2  
663 independent experiments were performed. For the microglial recruitment and analysis of dystrophic  
664 neurites, statistical significance (P value) was calculated using the unpaired two-tailed Student's *t*-  
665 test. Phagocytic assay was analyzed by the Dunnett's multiple comparison test of the Two-way  
666 ANOVA. Both statistical analysis were performed in GraphPad Prism. P value of <0.05 was  
667 considered to be statistically significant (\*; P < 0.05, \*\*; P < 0.01 and \*\*\*; P < 0.001, n.s. = not  
668 significant).

669

670 ***Data Availability***

671 The mass spectrometry proteomics data have been deposited to the ProteomeXchange Consortium via  
672 the PRIDE partner repository (Perez-Riverol et al., 2019) with the dataset identifier PXD016075.

673

674 ***Acknowledgements***

675 We thank Allison Morningstar and Matthias Prestel for critically reading the manuscript. The authors  
676 are grateful to Mathias Jucker (Hertie-Institute for Clinical Brain Research, University of Tübingen,  
677 Germany) for providing the APPPS1 mice and David Holtzman (Washington University School of  
678 Medicine, St Louis, Missouri, USA) for providing the ApoE antibody. We thank Haike Hampel for  
679 excellent technical assistance. Funds have been provided by the Alzheimer Forschung Initiative e.V.  
680 This work was also supported by the Deutsche Forschungsgemeinschaft (German Research  
681 Foundation) within the framework of the Munich Cluster for Systems Neurology (EXC 2145  
682 SyNergy), the European Research Council (ERC-StG 802305) and the Vascular Dementia Research

683 Foundation. C.H. is supported by a Koselleck Project of the DFG (HA1737/16-1) and the Helmholtz-  
684 Gemeinschaft (Zukunftsthema "Immunology and Inflammation" (ZT-0027)).

685

686

#### 687 **Author Contributions**

688 S.T. and S.F.L. designed and supervised the study. S.T., S.F.L., S.A.M., L.S.M. wrote the manuscript  
689 with input of all co-authors. L.S.M. performed animal experiments including microglial isolation,  
690 target validation and functional studies. A.C. assisted in isolation of primary microglia. S.A.M., J.K.,  
691 and A.B. performed the proteomic analysis. S.R., L.S.M. and A.L. performed FACS analysis. T.S.  
692 and T.C.S. provided the APP-KI mouse model. J.H. contributed to amyloid plaque analysis. L.S.M.,  
693 M.W., and C.H. contributed to biochemical analysis. Correspondence and requests for materials  
694 should be addressed to S.T. or S.F. L.

695

#### 696 **Competing Interests**

697 C.H. collaborates with Denali Therapeutics, participated on one advisory board meeting of Biogen,  
698 and received a speaker honorarium from Novartis and Roche. C.H. is chief advisor of ISAR  
699 Bioscience. All other authors declare that they have no competing interests.

700

## 701 **References**

- 702 Abner, E.L., Neltner, J.H., Jicha, G.A., Patel, E., Anderson, S.L., Wilcock, D.M., Van Eldik, L.J., and  
703 Nelson, P.T. (2018). Diffuse Amyloid-beta Plaques, Neurofibrillary Tangles, and the Impact of APOE  
704 in Elderly Persons' Brains Lacking Neuritic Amyloid Plaques. *Journal of Alzheimer's disease : JAD*  
705 *64*, 1307-1324. doi: 10.3233/JAD-180514.
- 706 Bacskai, B.J., Kajdasz, S.T., Christie, R.H., Carter, C., Games, D., Seubert, P., Schenk, D., and  
707 Hyman, B.T. (2001). Imaging of amyloid-beta deposits in brains of living mice permits direct  
708 observation of clearance of plaques with immunotherapy. *Nature medicine* *7*, 369-372. doi:  
709 10.1038/85525.
- 710 Bard, F., Cannon, C., Barbour, R., Burke, R.L., Games, D., Grajeda, H., Guido, T., Hu, K., Huang, J.,  
711 Johnson-Wood, K., *et al.* (2000). Peripherally administered antibodies against amyloid beta-peptide  
712 enter the central nervous system and reduce pathology in a mouse model of Alzheimer disease. *Nature*  
713 *medicine* *6*, 916-919. doi: 10.1038/78682.
- 714 Bohrmann, B., Baumann, K., Benz, J., Gerber, F., Huber, W., Knoflach, F., Messer, J., Oroszlan, K.,  
715 Rauchenberger, R., Richter, W.F., *et al.* (2012). Gantenerumab: a novel human anti-Abeta antibody  
716 demonstrates sustained cerebral amyloid-beta binding and elicits cell-mediated removal of human  
717 amyloid-beta. *Journal of Alzheimer's disease : JAD* *28*, 49-69. doi: 10.3233/JAD-2011-110977.
- 718 Bolmont, T., Haiss, F., Eicke, D., Radde, R., Mathis, C.A., Klunk, W.E., Kohsaka, S., Jucker, M., and  
719 Calhoun, M.E. (2008). Dynamics of the microglial/amyloid interaction indicate a role in plaque  
720 maintenance. *The Journal of neuroscience : the official journal of the Society for Neuroscience* *28*,  
721 4283-4292. doi: 10.1523/JNEUROSCI.4814-07.2008.
- 722 Bottcher, C., Schlickeiser, S., Sneebouer, M.A.M., Kunkel, D., Knop, A., Paza, E., Fidzinski, P., Kraus,  
723 L., Snijders, G.J.L., Kahn, R.S., *et al.* (2019). Human microglia regional heterogeneity and phenotypes  
724 determined by multiplexed single-cell mass cytometry. *Nature neuroscience* *22*, 78-90. doi:  
725 10.1038/s41593-018-0290-2.
- 726 Boza-Serrano, A., Ruiz, R., Sanchez-Varo, R., Garcia-Revilla, J., Yang, Y., Jimenez-Ferrer, I., Paulus,  
727 A., Wennstrom, M., Vilalta, A., Allendorf, D., *et al.* (2019). Galectin-3, a novel endogenous TREM2  
728 ligand, detrimentally regulates inflammatory response in Alzheimer's disease. *Acta neuropathologica*  
729 *138*, 251-273. doi: 10.1007/s00401-019-02013-z.
- 730 Bradshaw, E.M., Chibnik, L.B., Keenan, B.T., Ottoboni, L., Raj, T., Tang, A., Rosenkrantz, L.L.,  
731 Imboywa, S., Lee, M., Von Korff, A., *et al.* (2013). CD33 Alzheimer's disease locus: altered monocyte  
732 function and amyloid biology. *Nature neuroscience* *16*, 848-850. doi: 10.1038/nn.3435.
- 733 Bruderer, R., Bernhardt, O.M., Gandhi, T., Miladinovic, S.M., Cheng, L.Y., Messner, S., Ehrenberger,  
734 T., Zanotelli, V., Butscheid, Y., Escher, C., *et al.* (2015). Extending the limits of quantitative proteome  
735 profiling with data-independent acquisition and application to acetaminophen-treated three-  
736 dimensional liver microtissues. *Molecular & cellular proteomics : MCP* *14*, 1400-1410. doi:  
737 10.1074/mcp.M114.044305.
- 738 Butovsky, O., Jedrychowski, M.P., Moore, C.S., Cialic, R., Lanser, A.J., Gabriely, G., Koeglspenger,  
739 T., Dake, B., Wu, P.M., Doykan, C.E., *et al.* (2014). Identification of a unique TGF-beta-dependent  
740 molecular and functional signature in microglia. *Nature neuroscience* *17*, 131-143. doi:  
741 10.1038/nn.3599.
- 742 Calovi, S., Mut-Arbona, P., and Sperlagh, B. (2019). Microglia and the Purinergic Signaling System.  
743 *Neuroscience* *405*, 137-147. doi: 10.1016/j.neuroscience.2018.12.021.
- 744 Castellano, J.M., Kim, J., Stewart, F.R., Jiang, H., DeMattos, R.B., Patterson, B.W., Fagan, A.M.,  
745 Morris, J.C., Mawuenyega, K.G., Cruchaga, C., *et al.* (2011). Human apoE isoforms differentially  
746 regulate brain amyloid-beta peptide clearance. *Sci Transl Med* *3*, 89ra57. doi:  
747 10.1126/scitranslmed.3002156.



748 Cox, J., Hein, M.Y., Lubner, C.A., Paron, I., Nagaraj, N., and Mann, M. (2014). Accurate proteome-  
749 wide label-free quantification by delayed normalization and maximal peptide ratio extraction, termed  
750 MaxLFQ. *Molecular & cellular proteomics : MCP* *13*, 2513-2526. doi: 10.1074/mcp.M113.031591.  
751 Cummings, B.J., Su, J.H., Geddes, J.W., Van Nostrand, W.E., Wagner, S.L., Cunningham, D.D., and  
752 Cotman, C.W. (1992). Aggregation of the amyloid precursor protein within degenerating neurons and  
753 dystrophic neurites in Alzheimer's disease. *Neuroscience* *48*, 763-777. doi: 10.1016/0306-  
754 4522(92)90265-4.  
755 Cuyvers, E., and Sleegers, K. (2016). Genetic variations underlying Alzheimer's disease: evidence  
756 from genome-wide association studies and beyond. *Lancet Neurol* *15*, 857-868. doi: 10.1016/S1474-  
757 4422(16)00127-7.  
758 D'Andrea, M.R., Cole, G.M., and Ard, M.D. (2004). The microglial phagocytic role with specific  
759 plaque types in the Alzheimer disease brain. *Neurobiology of aging* *25*, 675-683. doi:  
760 10.1016/j.neurobiolaging.2003.12.026.  
761 Daria, A., Colombo, A., Llovera, G., Hampel, H., Willem, M., Liesz, A., Haass, C., and Tahirovic, S.  
762 (2017). Young microglia restore amyloid plaque clearance of aged microglia. *The EMBO journal* *36*,  
763 583-603. doi: 10.15252/embj.201694591.  
764 Edison, P., Donat, C.K., and Sastre, M. (2018). In vivo Imaging of Glial Activation in Alzheimer's  
765 Disease. *Front Neurol* *9*, 625. doi: 10.3389/fneur.2018.00625.  
766 Flowers, A., Bell-Temin, H., Jalloh, A., Stevens, S.M., Jr., and Bickford, P.C. (2017). Proteomic  
767 analysis of aged microglia: shifts in transcription, bioenergetics, and nutrient response. *J*  
768 *Neuroinflammation* *14*, 96. doi: 10.1186/s12974-017-0840-7.  
769 Galatro, T.F., Holtman, I.R., Lerario, A.M., Vainchtein, I.D., Brouwer, N., Sola, P.R., Veras, M.M.,  
770 Pereira, T.F., Leite, R.E.P., Moller, T., *et al.* (2017). Transcriptomic analysis of purified human  
771 cortical microglia reveals age-associated changes. *Nature neuroscience* *20*, 1162-1171. doi:  
772 10.1038/nn.4597.  
773 Gjoneska, E., Pfenning, A.R., Mathys, H., Quon, G., Kundaje, A., Tsai, L.H., and Kellis, M. (2015).  
774 Conserved epigenomic signals in mice and humans reveal immune basis of Alzheimer's disease.  
775 *Nature* *518*, 365-369. doi: 10.1038/nature14252.  
776 Gosselin, D., Skola, D., Coufal, N.G., Holtman, I.R., Schlachetzki, J.C.M., Sajti, E., Jaeger, B.N.,  
777 O'Connor, C., Fitzpatrick, C., Pasillas, M.P., *et al.* (2017). An environment-dependent transcriptional  
778 network specifies human microglia identity. *Science*. doi: 10.1126/science.aal3222.  
779 Gotzl, J.K., Brendel, M., Werner, G., Parhizkar, S., Sebastian Monasor, L., Kleinberger, G., Colombo,  
780 A.V., Deussing, M., Wagner, M., Winkelmann, J., *et al.* (2019). Opposite microglial activation stages  
781 upon loss of PGRN or TREM2 result in reduced cerebral glucose metabolism. *EMBO molecular*  
782 *medicine* *11*. doi: 10.15252/emmm.201809711.  
783 Grabert, K., Michoel, T., Karavolos, M.H., Clohisey, S., Baillie, J.K., Stevens, M.P., Freeman, T.C.,  
784 Summers, K.M., and McColl, B.W. (2016). Microglial brain region-dependent diversity and selective  
785 regional sensitivities to aging. *Nature neuroscience* *19*, 504-516. doi: 10.1038/nn.4222.  
786 Guerreiro, R., Wojtas, A., Bras, J., Carrasquillo, M., Rogaeva, E., Majounie, E., Cruchaga, C., Sassi,  
787 C., Kauwe, J.S., Younkin, S., *et al.* (2013). TREM2 variants in Alzheimer's disease. *N Engl J Med*  
788 *368*, 117-127. doi: 10.1056/NEJMoa1211851.  
789 Guillot-Sestier, M.V., and Town, T. (2013). Innate immunity in Alzheimer's disease: a complex affair.  
790 *CNS Neurol Disord Drug Targets* *12*, 593-607. doi:  
791 Hammond, T.R., Dufort, C., Dissing-Olesen, L., Giera, S., Young, A., Wysoker, A., Walker, A.J.,  
792 Gergits, F., Segel, M., Nemesh, J., *et al.* (2019). Single-Cell RNA Sequencing of Microglia throughout  
793 the Mouse Lifespan and in the Injured Brain Reveals Complex Cell-State Changes. *Immunity* *50*, 253-  
794 271 e256. doi: 10.1016/j.immuni.2018.11.004.



- 795 Hemonnot, A.L., Hua, J., Ulmann, L., and Hirbec, H. (2019). Microglia in Alzheimer Disease: Well-  
796 Known Targets and New Opportunities. *Front Aging Neurosci* *11*, 233. doi:  
797 10.3389/fnagi.2019.00233.
- 798 Hickman, S.E., Allison, E.K., and El Khoury, J. (2008). Microglial dysfunction and defective beta-  
799 amyloid clearance pathways in aging Alzheimer's disease mice. *The Journal of neuroscience : the*  
800 *official journal of the Society for Neuroscience* *28*, 8354-8360. doi: 10.1523/JNEUROSCI.0616-  
801 08.2008.
- 802 Holtman, I.R., Raj, D.D., Miller, J.A., Schaafsma, W., Yin, Z., Brouwer, N., Wes, P.D., Moller, T.,  
803 Orre, M., Kamphuis, W., *et al.* (2015). Induction of a common microglia gene expression signature  
804 by aging and neurodegenerative conditions: a co-expression meta-analysis. *Acta neuropathologica*  
805 *communications* *3*, 31. doi: 10.1186/s40478-015-0203-5.
- 806 Holtzman, D.M., Morris, J.C., and Goate, A.M. (2011). Alzheimer's disease: the challenge of the  
807 second century. *Sci Transl Med* *3*, 77sr71. doi: 10.1126/scitranslmed.3002369.
- 808 Hopperton, K.E., Mohammad, D., Trepanier, M.O., Giuliano, V., and Bazinet, R.P. (2018). Markers  
809 of microglia in post-mortem brain samples from patients with Alzheimer's disease: a systematic  
810 review. *Molecular psychiatry* *23*, 177-198. doi: 10.1038/mp.2017.246.
- 811 Huang da, W., Sherman, B.T., and Lempicki, R.A. (2009a). Bioinformatics enrichment tools: paths  
812 toward the comprehensive functional analysis of large gene lists. *Nucleic Acids Res* *37*, 1-13. doi:  
813 10.1093/nar/gkn923.
- 814 Huang da, W., Sherman, B.T., and Lempicki, R.A. (2009b). Systematic and integrative analysis of  
815 large gene lists using DAVID bioinformatics resources. *Nature protocols* *4*, 44-57. doi:  
816 10.1038/nprot.2008.211.
- 817 Jansen, I.E., Savage, J.E., Watanabe, K., Bryois, J., Williams, D.M., Steinberg, S., Sealock, J.,  
818 Karlsson, I.K., Hagg, S., Athanasiu, L., *et al.* (2019). Genome-wide meta-analysis identifies new loci  
819 and functional pathways influencing Alzheimer's disease risk. *Nat Genet.* doi: 10.1038/s41588-018-  
820 0311-9.
- 821 Janus, C., Pearson, J., McLaurin, J., Mathews, P.M., Jiang, Y., Schmidt, S.D., Chishti, M.A., Horne,  
822 P., Heslin, D., French, J., *et al.* (2000). A beta peptide immunization reduces behavioural impairment  
823 and plaques in a model of Alzheimer's disease. *Nature* *408*, 979-982. doi: 10.1038/35050110.
- 824 Jay, T.R., Hirsch, A.M., Broihier, M.L., Miller, C.M., Neilson, L.E., Ransohoff, R.M., Lamb, B.T.,  
825 and Landreth, G.E. (2017). Disease Progression-Dependent Effects of TREM2 Deficiency in a Mouse  
826 Model of Alzheimer's Disease. *The Journal of neuroscience : the official journal of the Society for*  
827 *Neuroscience* *37*, 637-647. doi: 10.1523/JNEUROSCI.2110-16.2016.
- 828 Jonsson, T., Stefansson, H., Steinberg, S., Jonsdottir, I., Jonsson, P.V., Snaedal, J., Bjornsson, S.,  
829 Huttenlocher, J., Levey, A.I., Lah, J.J., *et al.* (2013). Variant of TREM2 associated with the risk of  
830 Alzheimer's disease. *N Engl J Med* *368*, 107-116. doi: 10.1056/NEJMoa1211103.
- 831 Jordao, M.J.C., Sankowski, R., Brendecke, S.M., Sagar, Locatelli, G., Tai, Y.H., Tay, T.L., Schramm,  
832 E., Armbruster, S., Hagemeyer, N., *et al.* (2019). Single-cell profiling identifies myeloid cell subsets  
833 with distinct fates during neuroinflammation. *Science* *363*. doi: 10.1126/science.aat7554.
- 834 Jung, C.K., Keppler, K., Steinbach, S., Blazquez-Llorca, L., and Herms, J. (2015). Fibrillar amyloid  
835 plaque formation precedes microglial activation. *PloS one* *10*, e0119768. doi:  
836 10.1371/journal.pone.0119768.
- 837 Kamphuis, W., Kooijman, L., Schetters, S., Orre, M., and Hol, E.M. (2016). Transcriptional profiling  
838 of CD11c-positive microglia accumulating around amyloid plaques in a mouse model for Alzheimer's  
839 disease. *Biochimica et biophysica acta* *1862*, 1847-1860. doi: 10.1016/j.bbadis.2016.07.007.
- 840 Karch, C.M., and Goate, A.M. (2015). Alzheimer's disease risk genes and mechanisms of disease  
841 pathogenesis. *Biol Psychiatry* *77*, 43-51. doi: 10.1016/j.biopsych.2014.05.006.

842 Keren-Shaul, H., Spinrad, A., Weiner, A., Matcovitch-Natan, O., Dvir-Szternfeld, R., Ulland, T.K.,  
843 David, E., Baruch, K., Lara-Astaiso, D., Toth, B., *et al.* (2017). A Unique Microglia Type Associated  
844 with Restricting Development of Alzheimer's Disease. *Cell* *169*, 1276-1290 e1217. doi:  
845 10.1016/j.cell.2017.05.018.

846 Kim, J., Eltorai, A.E., Jiang, H., Liao, F., Verghese, P.B., Kim, J., Stewart, F.R., Basak, J.M., and  
847 Holtzman, D.M. (2012). Anti-apoE immunotherapy inhibits amyloid accumulation in a transgenic  
848 mouse model of Abeta amyloidosis. *J Exp Med* *209*, 2149-2156. doi: 10.1084/jem.20121274.

849 Kleinberger, G., Yamanishi, Y., Suarez-Calvet, M., Czirr, E., Lohmann, E., Cuyvers, E., Struyfs, H.,  
850 Pettkus, N., Wenninger-Weinzierl, A., Mazaheri, F., *et al.* (2014). TREM2 mutations implicated in  
851 neurodegeneration impair cell surface transport and phagocytosis. *Sci Transl Med* *6*, 243ra286. doi:  
852 10.1126/scitranslmed.3009093.

853 Koellhoffer, E.C., McCullough, L.D., and Ritzel, R.M. (2017). Old Maids: Aging and Its Impact on  
854 Microglia Function. *Int J Mol Sci* *18*. doi: 10.3390/ijms18040769.

855 Krasemann, S., Madore, C., Cialic, R., Baufeld, C., Calcagno, N., El Fatimy, R., Beckers, L.,  
856 O'Loughlin, E., Xu, Y., Fanek, Z., *et al.* (2017). The TREM2-APOE Pathway Drives the  
857 Transcriptional Phenotype of Dysfunctional Microglia in Neurodegenerative Diseases. *Immunity* *47*,  
858 566-581 e569. doi: 10.1016/j.immuni.2017.08.008.

859 Lambert, J.C., Heath, S., Even, G., Campion, D., Sleegers, K., Hiltunen, M., Combarros, O., Zelenika,  
860 D., Bullido, M.J., Tavernier, B., *et al.* (2009). Genome-wide association study identifies variants at  
861 CLU and CR1 associated with Alzheimer's disease. *Nat Genet* *41*, 1094-1099. doi: 10.1038/ng.439.

862 Lathuiliere, A., Laversenne, V., Astolfo, A., Kopetzki, E., Jacobsen, H., Stampanoni, M., Bohrmann,  
863 B., Schneider, B.L., and Aebischer, P. (2016). A subcutaneous cellular implant for passive  
864 immunization against amyloid-beta reduces brain amyloid and tau pathologies. *Brain : a journal of*  
865 *neurology* *139*, 1587-1604. doi: 10.1093/brain/aww036.

866 Liu, S., Liu, Y., Hao, W., Wolf, L., Kiliaan, A.J., Penke, B., Rube, C.E., Walter, J., Heneka, M.T.,  
867 Hartmann, T., *et al.* (2012). TLR2 is a primary receptor for Alzheimer's amyloid beta peptide to trigger  
868 neuroinflammatory activation. *J Immunol* *188*, 1098-1107. doi: 10.4049/jimmunol.1101121.

869 Mathys, H., Adaikkan, C., Gao, F., Young, J.Z., Manet, E., Hemberg, M., De Jager, P.L., Ransohoff,  
870 R.M., Regev, A., and Tsai, L.H. (2017). Temporal Tracking of Microglia Activation in  
871 Neurodegeneration at Single-Cell Resolution. *Cell reports* *21*, 366-380. doi:  
872 10.1016/j.celrep.2017.09.039.

873 Mawuenyega, K.G., Sigurdson, W., Ovod, V., Munsell, L., Kasten, T., Morris, J.C., Yarasheski, K.E.,  
874 and Bateman, R.J. (2010). Decreased clearance of CNS beta-amyloid in Alzheimer's disease. *Science*  
875 *330*, 1774. doi: 10.1126/science.1197623.

876 Mazaheri, F., Snaidero, N., Kleinberger, G., Madore, C., Daria, A., Werner, G., Krasemann, S.,  
877 Capell, A., Trumbach, D., Wurst, W., *et al.* (2017). TREM2 deficiency impairs chemotaxis and  
878 microglial responses to neuronal injury. *EMBO reports*. doi: 10.15252/embr.201743922.

879 McDonald, C.L., Hennessy, E., Rubio-Araiz, A., Keogh, B., McCormack, W., McGuirk, P., Reilly,  
880 M., and Lynch, M.A. (2016). Inhibiting TLR2 activation attenuates amyloid accumulation and glial  
881 activation in a mouse model of Alzheimer's disease. *Brain Behav Immun* *58*, 191-200. doi:  
882 10.1016/j.bbi.2016.07.143.

883 McQuade, A., and Blurton-Jones, M. (2019). Microglia in Alzheimer's Disease: Exploring How  
884 Genetics and Phenotype Influence Risk. *Journal of molecular biology* *431*, 1805-1817. doi:  
885 10.1016/j.jmb.2019.01.045.

886 Mildner, A., Huang, H., Radke, J., Stenzel, W., and Priller, J. (2017). P2Y12 receptor is expressed on  
887 human microglia under physiological conditions throughout development and is sensitive to  
888 neuroinflammatory diseases. *Glia* *65*, 375-387. doi: 10.1002/glia.23097.

889 Morgan, D., Diamond, D.M., Gottschall, P.E., Ugen, K.E., Dickey, C., Hardy, J., Duff, K., Jantzen,  
890 P., DiCarlo, G., Wilcock, D., *et al.* (2000). A beta peptide vaccination prevents memory loss in an  
891 animal model of Alzheimer's disease. *Nature* 408, 982-985. doi: 10.1038/35050116.

892 Mrdjen, D., Pavlovic, A., Hartmann, F.J., Schreiner, B., Utz, S.G., Leung, B.P., Lelios, I., Heppner,  
893 F.L., Kipnis, J., Merkler, D., *et al.* (2018). High-Dimensional Single-Cell Mapping of Central Nervous  
894 System Immune Cells Reveals Distinct Myeloid Subsets in Health, Aging, and Disease. *Immunity* 48,  
895 380-395 e386. doi: 10.1016/j.immuni.2018.01.011.

896 Naj, A.C., Jun, G., Beecham, G.W., Wang, L.S., Vardarajan, B.N., Buross, J., Gallins, P.J., Buxbaum,  
897 J.D., Jarvik, G.P., Crane, P.K., *et al.* (2011). Common variants at MS4A4/MS4A6E, CD2AP, CD33  
898 and EPHA1 are associated with late-onset Alzheimer's disease. *Nat Genet* 43, 436-441. doi:  
899 10.1038/ng.801.

900 Nicoll, J.A., Barton, E., Boche, D., Neal, J.W., Ferrer, I., Thompson, P., Vlachouli, C., Wilkinson, D.,  
901 Bayer, A., Games, D., *et al.* (2006). Abeta species removal after abeta42 immunization. *Journal of*  
902 *neuropathology and experimental neurology* 65, 1040-1048. doi:  
903 10.1097/01.jnen.0000240466.10758.ce.

904 Nicoll, J.A., Wilkinson, D., Holmes, C., Steart, P., Markham, H., and Weller, R.O. (2003).  
905 Neuropathology of human Alzheimer disease after immunization with amyloid-beta peptide: a case  
906 report. *Nature medicine* 9, 448-452. doi: 10.1038/nm840.

907 Orre, M., Kamphuis, W., Osborn, L.M., Jansen, A.H., Kooijman, L., Bossers, K., and Hol, E.M.  
908 (2014a). Isolation of glia from Alzheimer's mice reveals inflammation and dysfunction. *Neurobiology*  
909 *of aging* 35, 2746-2760. doi: 10.1016/j.neurobiolaging.2014.06.004.

910 Orre, M., Kamphuis, W., Osborn, L.M., Melief, J., Kooijman, L., Huitinga, I., Klooster, J., Bossers,  
911 K., and Hol, E.M. (2014b). Acute isolation and transcriptome characterization of cortical astrocytes  
912 and microglia from young and aged mice. *Neurobiology of aging* 35, 1-14. doi:  
913 10.1016/j.neurobiolaging.2013.07.008.

914 Parhizkar, S., Arzberger, T., Brendel, M., Kleinberger, G., Deussing, M., Focke, C., Nuscher, B.,  
915 Xiong, M., Ghasemigharagoz, A., Katzmarski, N., *et al.* (2019). Loss of TREM2 function increases  
916 amyloid seeding but reduces plaque-associated ApoE. *Nature neuroscience* 22, 191-204. doi:  
917 10.1038/s41593-018-0296-9.

918 Perez-Riverol, Y., Csordas, A., Bai, J., Bernal-Llinares, M., Hewapathirana, S., Kundu, D.J., Inuganti,  
919 A., Griss, J., Mayer, G., Eisenacher, M., *et al.* (2019). The PRIDE database and related tools and  
920 resources in 2019: improving support for quantification data. *Nucleic Acids Res* 47, D442-D450. doi:  
921 10.1093/nar/gky1106.

922 Radde, R., Bolmont, T., Kaeser, S.A., Coomaraswamy, J., Lindau, D., Stoltze, L., Calhoun, M.E.,  
923 Jaggi, F., Wolburg, H., Gengler, S., *et al.* (2006). Abeta42-driven cerebral amyloidosis in transgenic  
924 mice reveals early and robust pathology. *EMBO reports* 7, 940-946. doi: 10.1038/sj.embor.7400784.

925 Rangaraju, S., Dammer, E.B., Raza, S.A., Gao, T., Xiao, H., Betarbet, R., Duong, D.M., Webster,  
926 J.A., Hales, C.M., Lah, J.J., *et al.* (2018). Quantitative proteomics of acutely-isolated mouse microglia  
927 identifies novel immune Alzheimer's disease-related proteins. *Molecular neurodegeneration* 13, 34.  
928 doi: 10.1186/s13024-018-0266-4.

929 Rappsilber, J., Ishihama, Y., and Mann, M. (2003). Stop and go extraction tips for matrix-assisted  
930 laser desorption/ionization, nanoelectrospray, and LC/MS sample pretreatment in proteomics.  
931 *Analytical chemistry* 75, 663-670. doi:

932 Reddy, P.H., Manczak, M., Zhao, W., Nakamura, K., Bebbington, C., Yarranton, G., and Mao, P.  
933 (2009). Granulocyte-macrophage colony-stimulating factor antibody suppresses microglial activity:  
934 implications for anti-inflammatory effects in Alzheimer's disease and multiple sclerosis. *Journal of*  
935 *neurochemistry* 111, 1514-1528. doi: 10.1111/j.1471-4159.2009.06432.x.

- 936 Sadleir, K.R., Kandalepas, P.C., Buggia-Prevot, V., Nicholson, D.A., Thinakaran, G., and Vassar, R.  
937 (2016). Presynaptic dystrophic neurites surrounding amyloid plaques are sites of microtubule  
938 disruption, BACE1 elevation, and increased Abeta generation in Alzheimer's disease. *Acta*  
939 *neuropathologica* *132*, 235-256. doi: 10.1007/s00401-016-1558-9.
- 940 Saido, T.C. (1998). Alzheimer's disease as proteolytic disorders: anabolism and catabolism of beta-  
941 amyloid. *Neurobiology of aging* *19*, S69-75. doi:  
942 Saito, T., Matsuba, Y., Mihira, N., Takano, J., Nilsson, P., Itohara, S., Iwata, N., and Saido, T.C.  
943 (2014). Single App knock-in mouse models of Alzheimer's disease. *Nature neuroscience* *17*, 661-663.  
944 doi: 10.1038/nn.3697.
- 945 Sala Frigerio, C., Wolfs, L., Fattorelli, N., Thrupp, N., Voytyuk, I., Schmidt, I., Mancuso, R., Chen,  
946 W.T., Woodbury, M.E., Srivastava, G., *et al.* (2019). The Major Risk Factors for Alzheimer's Disease:  
947 Age, Sex, and Genes Modulate the Microglia Response to Abeta Plaques. *Cell reports* *27*, 1293-1306  
948 e1296. doi: 10.1016/j.celrep.2019.03.099.
- 949 Schenk, D., Barbour, R., Dunn, W., Gordon, G., Grajeda, H., Guido, T., Hu, K., Huang, J., Johnson-  
950 Wood, K., Khan, K., *et al.* (1999). Immunization with amyloid-beta attenuates Alzheimer-disease-  
951 like pathology in the PDAPP mouse. *Nature* *400*, 173-177. doi: 10.1038/22124.
- 952 Schilling, S., Rahfeld, J.U., Lues, I., and Lemere, C.A. (2018). Passive Abeta Immunotherapy: Current  
953 Achievements and Future Perspectives. *Molecules* *23*. doi: 10.3390/molecules23051068.
- 954 Scholtzova, H., Kascsak, R.J., Bates, K.A., Boutajangout, A., Kerr, D.J., Meeker, H.C., Mehta, P.D.,  
955 Spinner, D.S., and Wisniewski, T. (2009). Induction of toll-like receptor 9 signaling as a method for  
956 ameliorating Alzheimer's disease-related pathology. *The Journal of neuroscience : the official journal*  
957 *of the Society for Neuroscience* *29*, 1846-1854. doi: 10.1523/JNEUROSCI.5715-08.2009.
- 958 Sevigny, J., Chiao, P., Bussiere, T., Weinreb, P.H., Williams, L., Maier, M., Dunstan, R., Salloway,  
959 S., Chen, T., Ling, Y., *et al.* (2016). The antibody aducanumab reduces Abeta plaques in Alzheimer's  
960 disease. *Nature* *537*, 50-56. doi: 10.1038/nature19323.
- 961 Sharma, K., Schmitt, S., Bergner, C.G., Tyanova, S., Kannaiyan, N., Manrique-Hoyos, N., Kongi, K.,  
962 Cantuti, L., Hanisch, U.K., Philips, M.A., *et al.* (2015). Cell type- and brain region-resolved mouse  
963 brain proteome. *Nature neuroscience* *18*, 1819-1831. doi: 10.1038/nn.4160.
- 964 Shi, Y., and Holtzman, D.M. (2018). Interplay between innate immunity and Alzheimer disease:  
965 APOE and TREM2 in the spotlight. *Nat Rev Immunol* *18*, 759-772. doi: 10.1038/s41577-018-0051-  
966 1.
- 967 Sims, R., van der Lee, S.J., Naj, A.C., Bellenguez, C., Badarinarayan, N., Jakobsdottir, J., Kunkle,  
968 B.W., Boland, A., Raybould, R., Bis, J.C., *et al.* (2017). Rare coding variants in PLCG2, ABI3, and  
969 TREM2 implicate microglial-mediated innate immunity in Alzheimer's disease. *Nat Genet* *49*, 1373-  
970 1384. doi: 10.1038/ng.3916.
- 971 Solito, E., and Sastre, M. (2012). Microglia function in Alzheimer's disease. *Front Pharmacol* *3*, 14.  
972 doi: 10.3389/fphar.2012.00014.
- 973 Thygesen, C., Ilkjaer, L., Kempf, S.J., Hemdrup, A.L., von Linstow, C.U., Babcock, A.A., Darvesh,  
974 S., Larsen, M.R., and Finsen, B. (2018). Diverse Protein Profiles in CNS Myeloid Cells and CNS  
975 Tissue From Lipopolysaccharide- and Vehicle-Injected APPSWE/PS1DeltaE9 Transgenic Mice  
976 Implicate Cathepsin Z in Alzheimer's Disease. *Front Cell Neurosci* *12*, 397. doi:  
977 10.3389/fncel.2018.00397.
- 978 Tusher, V.G., Tibshirani, R., and Chu, G. (2001). Significance analysis of microarrays applied to the  
979 ionizing radiation response. *Proceedings of the National Academy of Sciences of the United States of*  
980 *America* *98*, 5116-5121. doi: 10.1073/pnas.091062498.
- 981 Tyanova, S., Temu, T., Sinitcyn, P., Carlson, A., Hein, M.Y., Geiger, T., Mann, M., and Cox, J.  
982 (2016). The Perseus computational platform for comprehensive analysis of (prote)omics data. *Nat*  
983 *Methods* *13*, 731-740. doi: 10.1038/nmeth.3901.



984 Ulrich, J.D., Ulland, T.K., Mahan, T.E., Nystrom, S., Nilsson, K.P., Song, W.M., Zhou, Y., Reinartz,  
985 M., Choi, S., Jiang, H., *et al.* (2018). ApoE facilitates the microglial response to amyloid plaque  
986 pathology. *J Exp Med* 215, 1047-1058. doi: 10.1084/jem.20171265.  
987 Van Acker, Z.P., Bretou, M., and Annaert, W. (2019). Endo-lysosomal dysregulations and late-onset  
988 Alzheimer's disease: impact of genetic risk factors. *Molecular neurodegeneration* 14, 20. doi:  
989 10.1186/s13024-019-0323-7.  
990 Wang, Y., Cella, M., Mallinson, K., Ulrich, J.D., Young, K.L., Robinette, M.L., Gilfillan, S.,  
991 Krishnan, G.M., Sudhakar, S., Zinselmeyer, B.H., *et al.* (2015). TREM2 lipid sensing sustains the  
992 microglial response in an Alzheimer's disease model. *Cell* 160, 1061-1071. doi:  
993 10.1016/j.cell.2015.01.049.  
994 Wilcock, D.M., Rojiani, A., Rosenthal, A., Levkowitz, G., Subbarao, S., Alamed, J., Wilson, D.,  
995 Wilson, N., Freeman, M.J., Gordon, M.N., *et al.* (2004). Passive amyloid immunotherapy clears  
996 amyloid and transiently activates microglia in a transgenic mouse model of amyloid deposition. *The*  
997 *Journal of neuroscience : the official journal of the Society for Neuroscience* 24, 6144-6151. doi:  
998 10.1523/JNEUROSCI.1090-04.2004.  
999 Wildsmith, K.R., Holley, M., Savage, J.C., Skerrett, R., and Landreth, G.E. (2013). Evidence for  
1000 impaired amyloid beta clearance in Alzheimer's disease. *Alzheimer's research & therapy* 5, 33. doi:  
1001 10.1186/alzrt187.  
1002 Wisniewski, J.R., Zougman, A., Nagaraj, N., and Mann, M. (2009). Universal sample preparation  
1003 method for proteome analysis. *Nat Methods* 6, 359-362. doi: 10.1038/nmeth.1322.  
1004 Xiang, X., Werner, G., Bohrmann, B., Liesz, A., Mazaheri, F., Capell, A., Feederle, R., Knuesel, I.,  
1005 Kleinberger, G., and Haass, C. (2016). TREM2 deficiency reduces the efficacy of immunotherapeutic  
1006 amyloid clearance. *EMBO molecular medicine* 8, 992-1004. doi: 10.15252/emmm.201606370.  
1007 Yamasaki, A., Eimer, S., Okochi, M., Smialowska, A., Kaether, C., Baumeister, R., Haass, C., and  
1008 Steiner, H. (2006). The GxGD motif of presenilin contributes to catalytic function and substrate  
1009 identification of gamma-secretase. *The Journal of neuroscience : the official journal of the Society for*  
1010 *Neuroscience* 26, 3821-3828. doi: 10.1523/JNEUROSCI.5354-05.2006.  
1011 Yin, Z., Raj, D., Saiepour, N., Van Dam, D., Brouwer, N., Holtman, I.R., Eggen, B.J.L., Moller, T.,  
1012 Tamm, J.A., Abdourahman, A., *et al.* (2017). Immune hyperreactivity of Abeta plaque-associated  
1013 microglia in Alzheimer's disease. *Neurobiology of aging* 55, 115-122. doi:  
1014 10.1016/j.neurobiolaging.2017.03.021.  
1015 Yuan, P., Condello, C., Keene, C.D., Wang, Y., Bird, T.D., Paul, S.M., Luo, W., Colonna, M.,  
1016 Baddeley, D., and Grutzendler, J. (2016). TREM2 Haplodeficiency in Mice and Humans Impairs the  
1017 Microglia Barrier Function Leading to Decreased Amyloid Compaction and Severe Axonal  
1018 Dystrophy. *Neuron* 92, 252-264. doi: 10.1016/j.neuron.2016.09.016.  
1019 Zabala, A., Vazquez-Villoldo, N., Rissiek, B., Gejo, J., Martin, A., Palomino, A., Perez-Samartin, A.,  
1020 Pulagam, K.R., Lukowiak, M., Capetillo-Zarate, E., *et al.* (2018). P2X4 receptor controls microglia  
1021 activation and favors remyelination in autoimmune encephalitis. *EMBO molecular medicine* 10. doi:  
1022 10.15252/emmm.201708743.  
1023 Zuroff, L., Daley, D., Black, K.L., and Koronyo-Hamaoui, M. (2017). Clearance of cerebral Abeta in  
1024 Alzheimer's disease: reassessing the role of microglia and monocytes. *Cell Mol Life Sci* 74, 2167-  
1025 2201. doi: 10.1007/s00018-017-2463-7.  
1026  
1027  
1028  
1029

1030 **Figure Legends**

1031

1032 **Figure 1. Quantitative proteomics of acutely isolated microglia.** Volcano plots of APPPS1 and  
1033 APP-KI *versus* WT microglia at 1 (**A** and **B**), 3 (**C** and **D**), 6 (**E** and **F**) and 12 (**G** and **H**) months of  
1034 age. The minus log<sub>10</sub> transformed p-value is plotted against the log<sub>2</sub> transformed LFQ ratios. A  
1035 permutation based FDR estimation was applied which is visualized as hyperbolic curves. Proteins  
1036 with log<sub>2</sub> LFQ ratio lower than -0.5 or higher than +0.5 with a p-value less than 0.05 which remain  
1037 significantly changed after FDR correction are indicated as red circles. Non-significantly changed  
1038 proteins are indicated as blue circles. Individual proteins are marked with their gene names.

1039

1040 **Figure 2. APPPS1 microglia display earlier proteomic changes compared to APP-KI microglia.**  
1041 **A.** Profile plots of APPPS1 and APP-KI *versus* WT microglia at 1, 3, 6, and 12 months of age. Lines  
1042 connect the average log<sub>2</sub> fold changes of each protein at the different time points. Regulated proteins  
1043 were grouped according to three profiles: significantly increased or decreased after FDR correction  
1044 (log<sub>2</sub> FC > 0.5 or < -0.5; p < 0.05; FDR significant) at 3, 6, and 12 months, only at 3 and 6 months,  
1045 or only at 12 months. Proteins that fulfill these criteria are indicated as red and blue lines for increased  
1046 and decreased abundance, respectively. Selected up- or down-regulated proteins are indicated with  
1047 magenta and cyan. Proteins that were regulated at 3, 6, and 12 months in APPPS1 mice as well as at  
1048 6 and 12, or only at 12 months in APP-KI mice were annotated as early MARPs. Proteins that were  
1049 regulated at 6 and 12 months in APPPS1 as well as at 6 and 12, or only at 12 months in APP-KI mice  
1050 were annotated as middle MARPs. Proteins that were regulated at 12 months in APPPS1 and APP-KI  
1051 mice were annotated as advanced MARPs. Heatmaps show the log<sub>2</sub> fold changes of the top 74 up- or  
1052 down-regulated proteins for early (**B**), middle (**C**) and advanced (**D**) MARPs and are compared to the  
1053 log<sub>2</sub> fold changes of related transcripts of DAM and homeostatic microglia (Keren-Shaul et al., 2017),  
1054 indicated with K-S. Crosses indicate missing values.

1055

1056 **Figure 3. Gene ontology enrichment cluster analysis for biological process (BP) of MARPs.** Bar  
1057 graphs show the clustering of early MARPs (**A**), middle MARPs (**B**) and advanced MARPs (**C**) for  
1058 BP. Up- and down-regulated proteins were analyzed separately using the web-based software tool  
1059 DAVID 6.8 with all consistently quantified proteins (5500) as an individual background. Significantly  
1060 enriched clusters (Enrichment Score > 1.301) for up- and down-regulated proteins are indicated in blue  
1061 and red, respectively.

1062 **Figure 4. Microglial CLEC7a is prominently up-regulated in 3 month old APPPS1 mice.**  
1063 Immunohistochemical analysis of CLEC7a (red) revealed an increased abundance of this early MARP  
1064 in IBA1 positive (green) APPPS1 microglia surrounding A $\beta$  plaques (magenta) that is less prominent  
1065 in APP-KI microglia. CLEC7a was barely detected in WT microglia. Hoechst was used for nuclear  
1066 staining (blue). Boxed regions in upper panels (scale bar: 50  $\mu$ m) are shown with a higher  
1067 magnification in lower panels (scale bar: 10  $\mu$ m).

1068  
1069 **Figure 5. Microglial CLEC7a is increased in both AD mouse models at 12 months of age.**  
1070 Immunohistochemical analysis showed an up-regulation of CLEC7a (red) in IBA1 positive (green)  
1071 APPPS1 and APP-KI microglia surrounding A $\beta$  plaques (magenta), compared to WT where CLEC7a  
1072 was barely detected. Hoechst was used for nuclear staining (blue). Boxed regions in upper panels  
1073 (scale bar: 50  $\mu$ m) are shown with a higher magnification in lower panels (scale bar: 10  $\mu$ m).

1074  
1075 **Figure 6. Microglial TMEM119 is down-regulated in both AD mouse models at 12 months of**  
1076 **age.** Immunohistochemical analysis of TMEM119 (red) shows a broad coverage signal of this  
1077 homeostatic marker in IBA1 positive (green) WT microglia. In the APPPS1 and APP-KI mice,  
1078 TMEM119 signal is reduced in IBA1 positive microglia surrounding A $\beta$  plaques (magenta). Of note,  
1079 increased TMEM119 signal was often found in the core of amyloid plaques in APPPS1 and APP-KI  
1080 mice. Hoechst was used for nuclear staining (blue). Boxed regions in upper panels (scale bar: 50  $\mu$ m)  
1081 are shown with a higher magnification in lower panels (scale bar: 10  $\mu$ m) and illustrate reduced levels  
1082 of TMEM119 in plaque associated microglia.

1083  
1084 **Figure 7. APPPS1 A $\beta$  plaques display a higher content of fibrillar A $\beta$  compared to APP-KI**  
1085 **plaques. A.** Immunohistochemical analysis showing total A $\beta$  (green), fibrillar A $\beta$  (ThR, red) and  
1086 microglia (IBA1, magenta) in both mouse models at 3, 6 and 12 months of age. Hoechst was used for  
1087 nuclear staining (blue). Scale bar: 100  $\mu$ m **B.** Western blot analysis of insoluble A $\beta$  at 3, 6 and 12  
1088 months of age confirms increased levels of fibrillar A $\beta$  in APPPS1 compared to APP-KI mice.

1089  
1090 **Figure 8. Fibrillar A $\beta$  triggers higher microglial recruitment in 3 month old APPPS1 mice and**  
1091 **correlates with a phagocytic impairment. A.** Representative picture of IBA1 positive (green)  
1092 microglia polarized towards the fibrillar A $\beta$  core (ThR, red, white arrow), rather than the surrounding



1093 plaque halo (magenta) in 3 month old APPPS1 and APP-KI mice. Hoechst (HOE) was used for nuclear  
1094 staining (blue). Yellow arrows indicate intracellular fibrillar A $\beta$  within APPPS1 microglia. Scale bar:  
1095 10  $\mu$ m. **B.** Quantification of IBA1 positive cells recruited to amyloid plaques in 3 month old APPPS1  
1096 and APP-KI mice. Microglial numbers are normalized to the plaque area. **C.** Quantification of plaque  
1097 size in 3 month old APPPS1 and APP-KI mice. **D.** Immunohistochemical analysis of IBA1 (green) and  
1098 CD68 (red) positive microglial cells recruited to A $\beta$  plaques (magenta) in 3 month old APPPS1 and  
1099 APP-KI mice. Hoechst was used for nuclear staining (blue). Scale bar: 20  $\mu$ m. **E.** Quantification of  
1100 CD68 coverage in 3 month old APPPS1 and APP-KI mice. CD68 coverage is normalized to the plaque  
1101 area. **F.** Quantification of CD68 coverage per microglia in 3 month old APPPS1 and APP-KI mice.  
1102 CD68 coverage is normalized to the number of IBA1 positive cells recruited to amyloid plaque. **G.**  
1103 Immunohistochemical analysis of dystrophic neurites detected using an antibody against APP (green)  
1104 in 3 month old APPPS1 and APP-KI mice. ThR was used to detect fibrillar A $\beta$  plaque core (red) and  
1105 the whole A $\beta$  plaque was visualized using an antibody against A $\beta$  (magenta). Hoechst was used for  
1106 nuclear staining (blue). Scale bar: 20  $\mu$ m. **H.** Quantification of area covered by dystrophic neurites in  
1107 3 month old APPPS1 and APP-KI mice. In **B**, **C**, **E**, **F** and **H**, represented values are expressed as the  
1108 mean of n=3 mice per genotype  $\pm$  SD (\*P < 0.05; \*\*P < 0.01, unpaired two-tailed Student's T-test;  
1109 n.s: not significant). **I.** Mean Fluorescence Intensity (MFI) of *E.coli*-pHrodo signal within the CD11b  
1110 positive cells in 3 and 6 month old APPPS1, APP-KI and WT mice. CytoD was used to inhibit  
1111 phagocytosis and serves as a negative control. a.u.: arbitrary units. **J.** Percentage of CD11b and *E.coli*-  
1112 pHrodo double positive cells from the total CD11b positive population. In **I** and **J**, values for the 3  
1113 month old group are expressed as the mean of n=3 mice per genotype  $\pm$  SD from three independent  
1114 experiments and for the 6 month old group as the mean of n=2 mice per genotype  $\pm$  SD from two  
1115 independent experiments (\*\*\*P < 0.001, Two-way ANOVA, Dunnett's multiple comparison test; n.s:  
1116 not significant).

1117

1118

1119

1120

1121

1122 **Supplementary Figure Legends**

1123 **Suppl. Figure 1. Quality control of microglial isolation using MACS.** FACS analysis of the  
1124 CD11b-enriched (A) and CD11b-depleted fraction (B). Propidium Iodide (PI) was used to analyze  
1125 cell viability (PI negative fraction).

1126

1127 **Suppl. Figure 2. Improvement of the data acquisition method for quantitative proteomics of**  
1128 **microglia. A.** Workflow of the proteomic analysis. Microglia were acutely isolated using the CD11b  
1129 MACS system. Protein lysates were subjected to tryptic digestion followed by quantitative LC-  
1130 MS/MS analysis. APPPS1 microglia samples were first measured using DDA to generate a spectral  
1131 library required for DIA analysis. Afterwards, both APPPS1 and APPKI microglia were measured  
1132 using DIA and data was subjected to further bioinformatics analysis. **B.** Distribution of quantified  
1133 proteins with DDA and DIA. The number of quantified proteins is plotted against the log<sub>10</sub>  
1134 transformed iBAQ (intensity based absolute quantification) values with a bin size of 0.25. The iBAQ  
1135 values are an estimate of the relative molar abundance of a protein within the sample. The number of  
1136 consistently quantified proteins per bin for DDA and DIA are indicated in blue and red, respectively.  
1137 Proteins that were only quantified with DDA or DIA are colored in light blue and orange, respectively.  
1138 The single values are connected with dashed lines for better visibility. Please note that DIA provides  
1139 additional quantifications for low abundant proteins. Hereby, DIA extends the dynamic range for  
1140 protein quantification by almost one order of magnitude. **C.** Number of relatively quantified proteins  
1141 between APPPS1 and WT microglia for 1, 3, 6, and 12 months with DDA (blue) and DIA (red). Only  
1142 proteins that were consistently quantified in all APPPS1 and WT samples per age group were counted.  
1143 Please note that DIA provides between 24 and 35% additional quantifications per age group. **D.** The  
1144 comparison of relatively quantified proteins of APPPS1 and APP-KI *versus* WT at 12 months shows  
1145 a large overlap of 93.5% indicating a very consistent quantification.

1146

1147 **Suppl. Figure 3. A $\beta$  pathology in 3, 6 and 12 month old APPPS1 and APP-KI mice.**  
1148 Immunohistochemical analysis of A $\beta$  load (NAB228, green) in APPPS1 and APP-KI mice. Hoechst  
1149 was used for nuclear staining (blue). Scale bar: 400  $\mu$ m.

1150

1151 **Suppl. Figure 4. Comparison of the early, middle and advanced MARPs in APPPS1 and APP-**  
1152 **KI mice. A.** A Venn diagram illustrates the classification of regulated proteins into early, middle and  
1153 advanced MARPs. Proteins that were regulated at 3, 6, and 12 months in APPPS1 mice as well as at

1154 6 and 12, or only at 12 months in APP-KI mice were annotated as early MARPs. Proteins that were  
1155 regulated at 6 and 12 months in APPPS1 as well as at 6 and 12, or only at 12 months in APP-KI mice  
1156 were annotated as middle MARPs. Proteins that were regulated at 12 months in APPPS1 and APP-KI  
1157 mice were annotated as advanced MARPs. **B.** Correlation plot of log<sub>2</sub> protein fold changes detected  
1158 at 12 months for APPPS1 and APP-KI *versus* WT. The plot shows a significant correlation of  
1159 proteomic changes at 12 months. Early, middle, and advanced MARPs are indicated in red, orange,  
1160 and black circles with yellow filling, respectively. Selected proteins are annotated with their gene  
1161 names. **C.** Comparison of our proteomic study with the single cell transcriptomics study (Keren-Shaul  
1162 et al., 2017) reveals a modest overlap. A Venn diagram illustrates the comparison of quantified  
1163 proteins in APPPS1 and APP-KI *versus* WT at 12 months and DAM and homeostatic microglial  
1164 transcripts. Overall, 3348 common proteins and related transcripts were quantified. **D.** Biochemical  
1165 validation of proteomic data was performed using Western blot analysis of microglial lysates from 12  
1166 month old mice. This analysis revealed an increased abundance of up-regulated MARPs APOE,  
1167 TREM2, CD68 and FABP5 as well as a decreased abundance of the down-regulated MARP CSF1R  
1168 in APPPS1 and APP-KI compared to WT microglia. Arrows indicate antibody-detected specific bands  
1169 and asterisk indicates unspecific bands.

1170

1171 **Suppl. Figure 5. Gene ontology enrichment cluster analysis for cellular component (CC) and**  
1172 **molecular function (MF) of MARPs.** The bar graphs show the clustering of early MARPs (**A, D**),  
1173 middle MARPs (**B, E**) and advanced MARPs (**C, F**) for CC and MF. Up- and down-regulated proteins  
1174 were analyzed separately using the web-based software tool DAVID 6.8 using all consistently  
1175 quantified proteins (5500) as an individual background. Significantly enriched clusters (Enrichment  
1176 Score > 1.301) for up- and down-regulated proteins are indicated in blue and red, respectively.

1177

1178 **Suppl. Figure 6. Microglial TREM2 is prominently up-regulated in 3 month old APPPS1 mice.**  
1179 Immunohistochemical analysis of TREM2 (red) revealed an increased abundance in IBA1 positive  
1180 (green) APPPS1 microglia surrounding A $\beta$  plaques (magenta) that is less prominent in APP-KI  
1181 microglia. Hoechst was used for nuclear staining (blue). Boxed regions in upper panels (scale bar: 50  
1182  $\mu$ m) are shown with a higher magnification in lower panels (scale bar: 10  $\mu$ m).

1183

1184 **Suppl. Figure 7. Microglial APOE is prominently up-regulated in 3 month old APPPS1 mice.**  
1185 Immunohistochemical analysis of APOE (red) revealed an up-regulation in IBA1 positive (green)

1186 APPPS1 microglia surrounding A $\beta$  plaques (magenta) that is less prominent in APP-KI microglia.  
1187 APOE could not be detected in WT microglia. Hoechst was used for nuclear staining (blue). Of note,  
1188 astrocytic APOE immunoreactivity was also detected, particularly in the WT, reflecting its  
1189 physiological expression. Yellow arrows indicate APOE positive microglia. Boxed regions in upper  
1190 panels (scale bar: 50  $\mu$ m) are shown with a higher magnification in lower panels (scale bar: 10  $\mu$ m).

1191

1192 **Suppl. Figure 8. Phagocytosis is impaired earlier in APPPS1 compared to APP-KI microglia. A.**

1193 Histograms represent the fluorescence intensity of uptaken E.coli-pHrodo green particles within the  
1194 CD11b positive population for every genotype and time point (3 and 6 months). Dashed lines indicate  
1195 the mean fluorescence intensity (MFI) calculated with the geometric mean for each condition. **B.**  
1196 FACS analysis representing the percentage of CD11b and E.coli-pHrodo positive cells out of the  
1197 whole CD11b positive population for every genotype.

1198

1199

1200

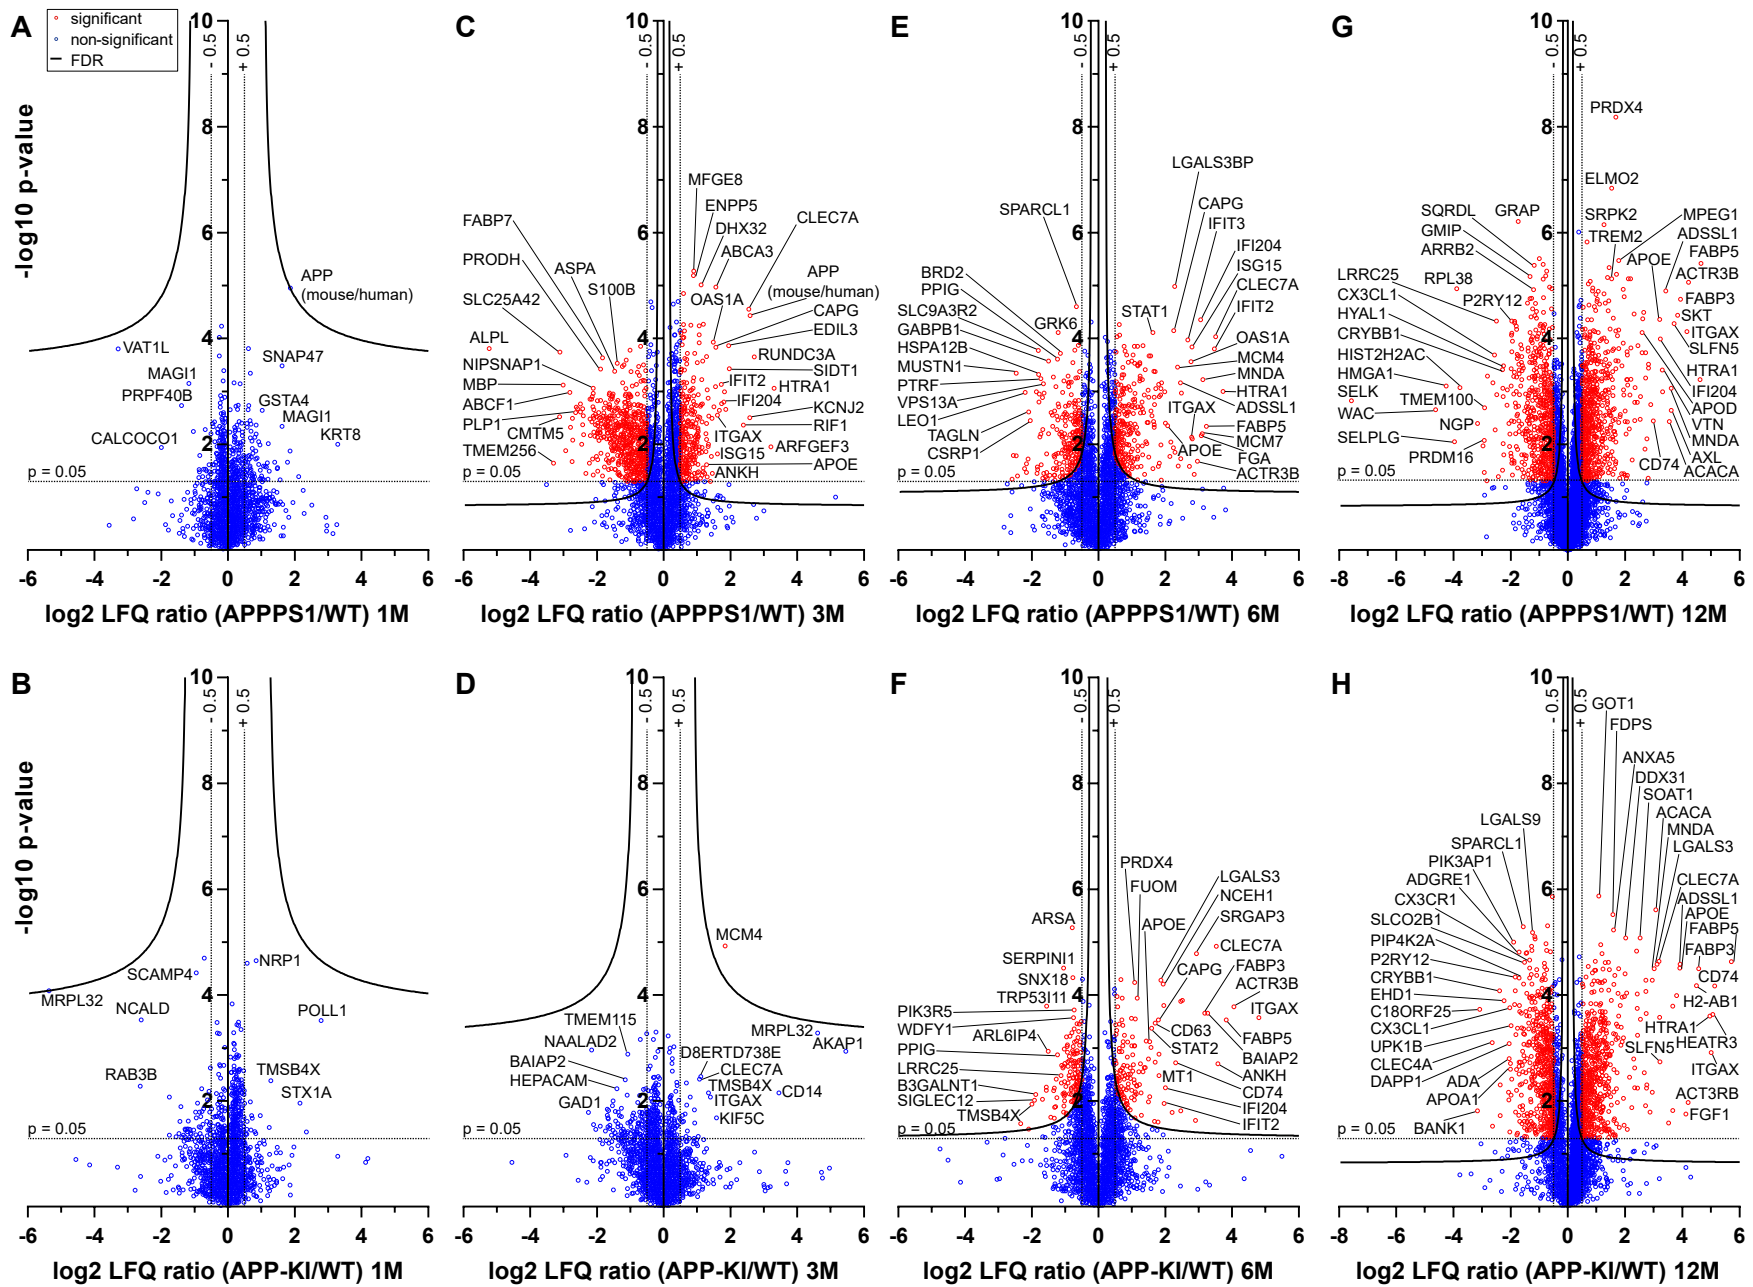

Fig 1



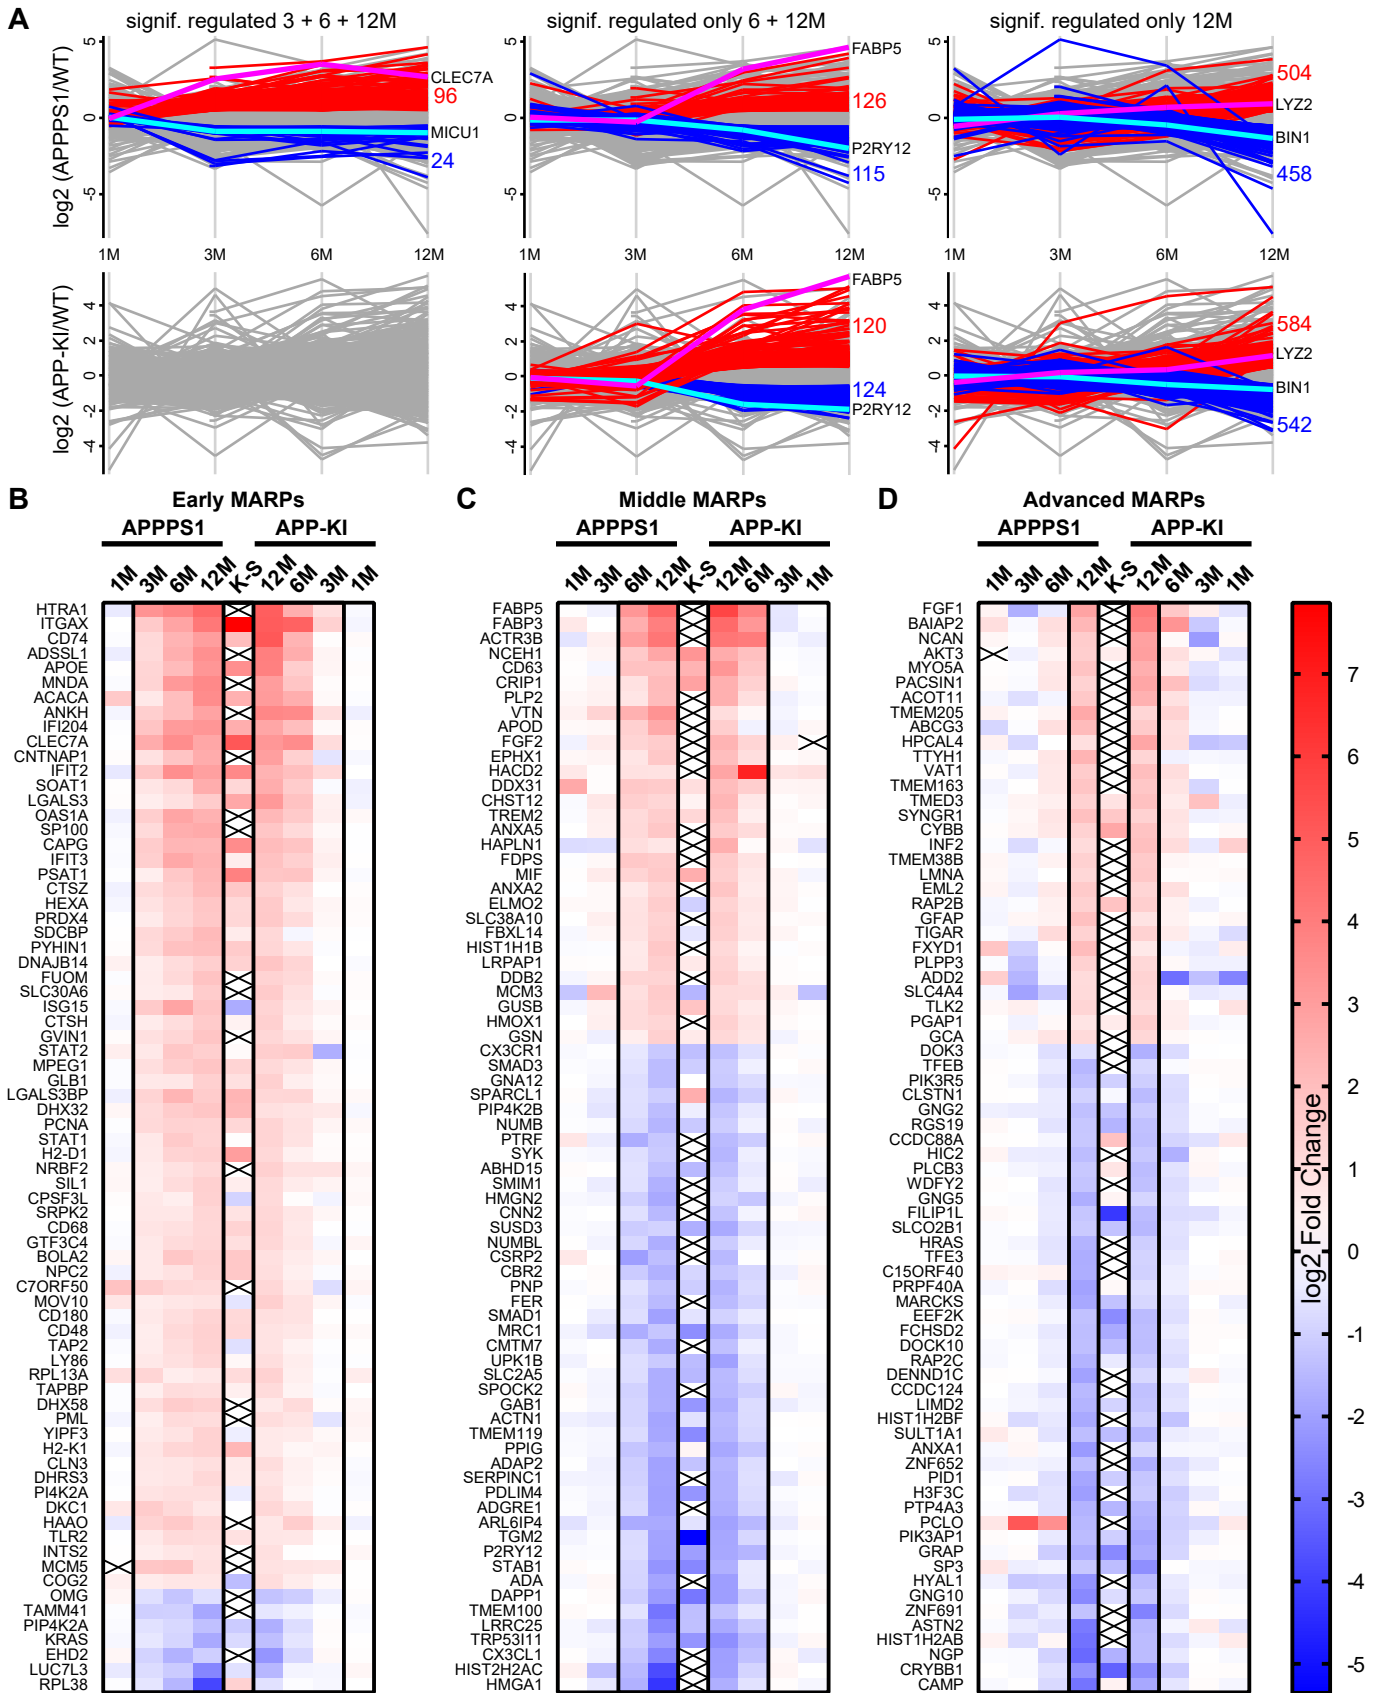

Fig 2

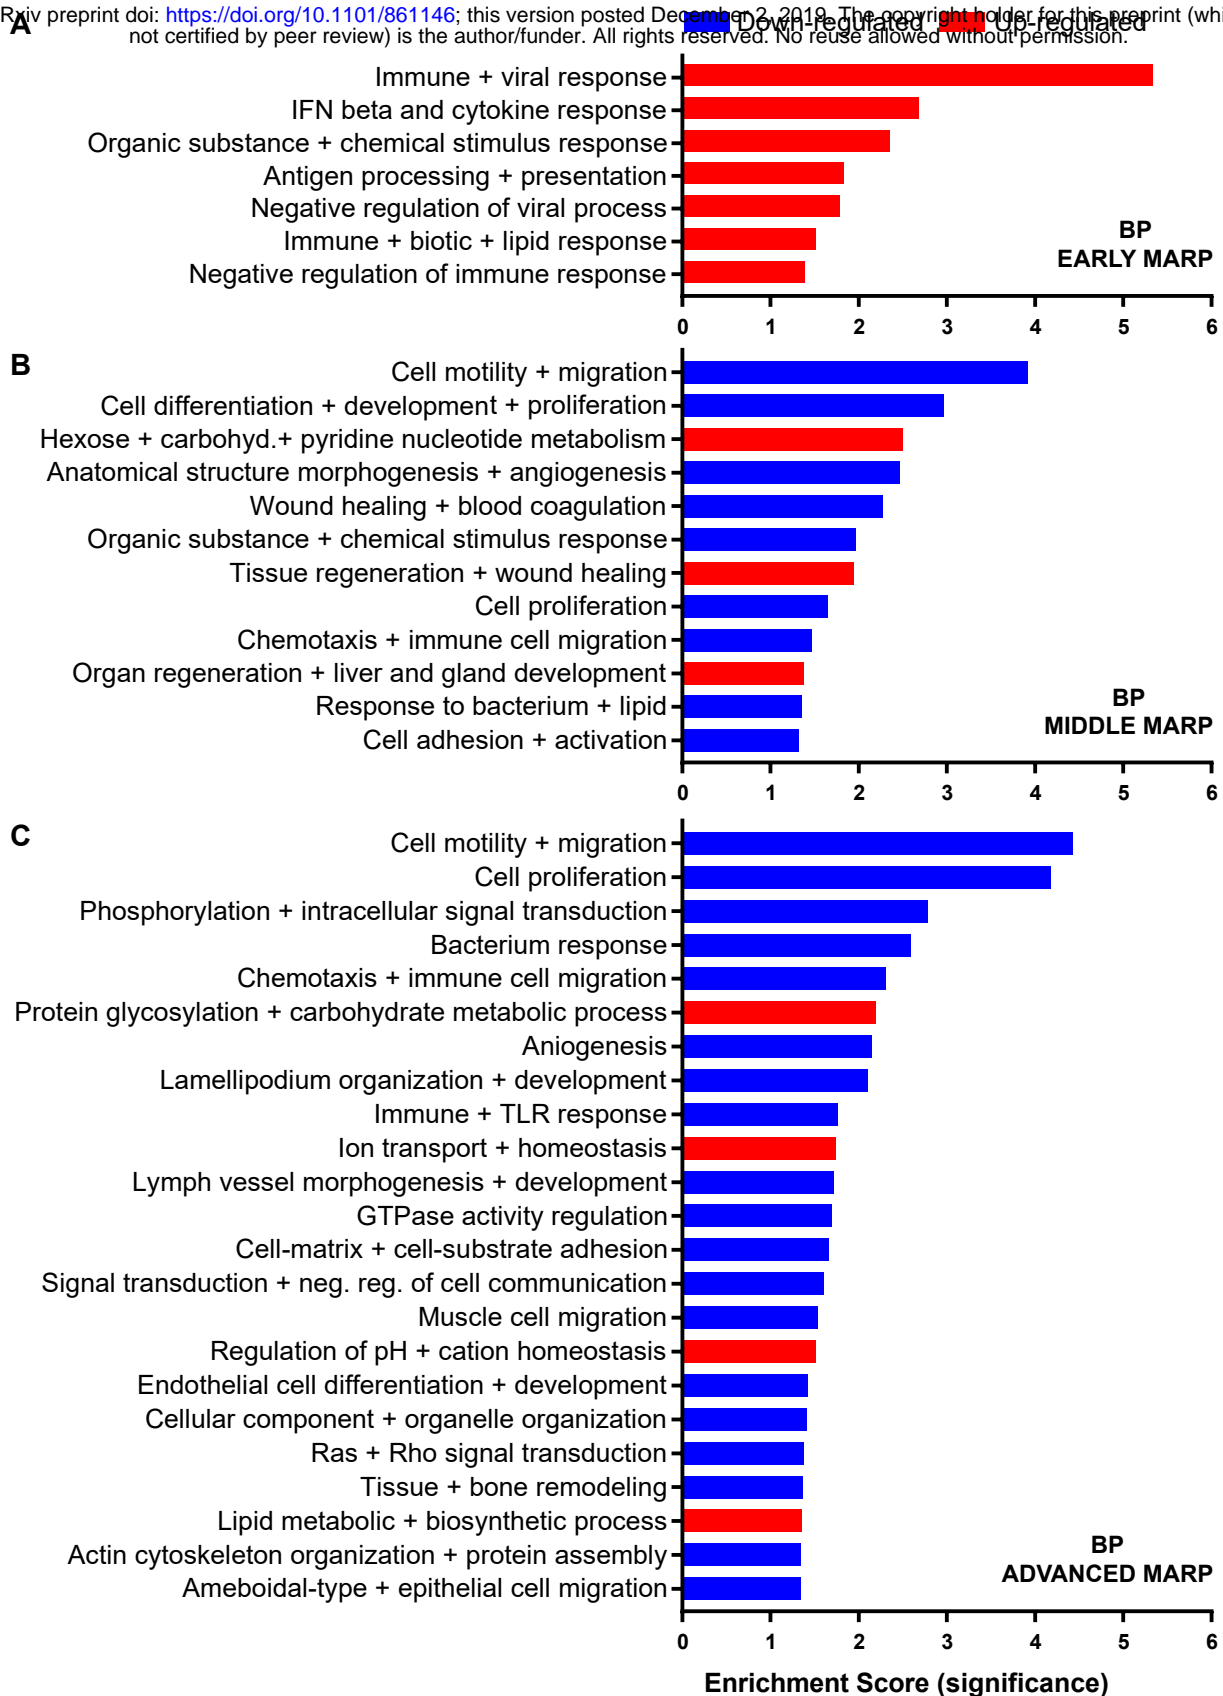

Fig 3

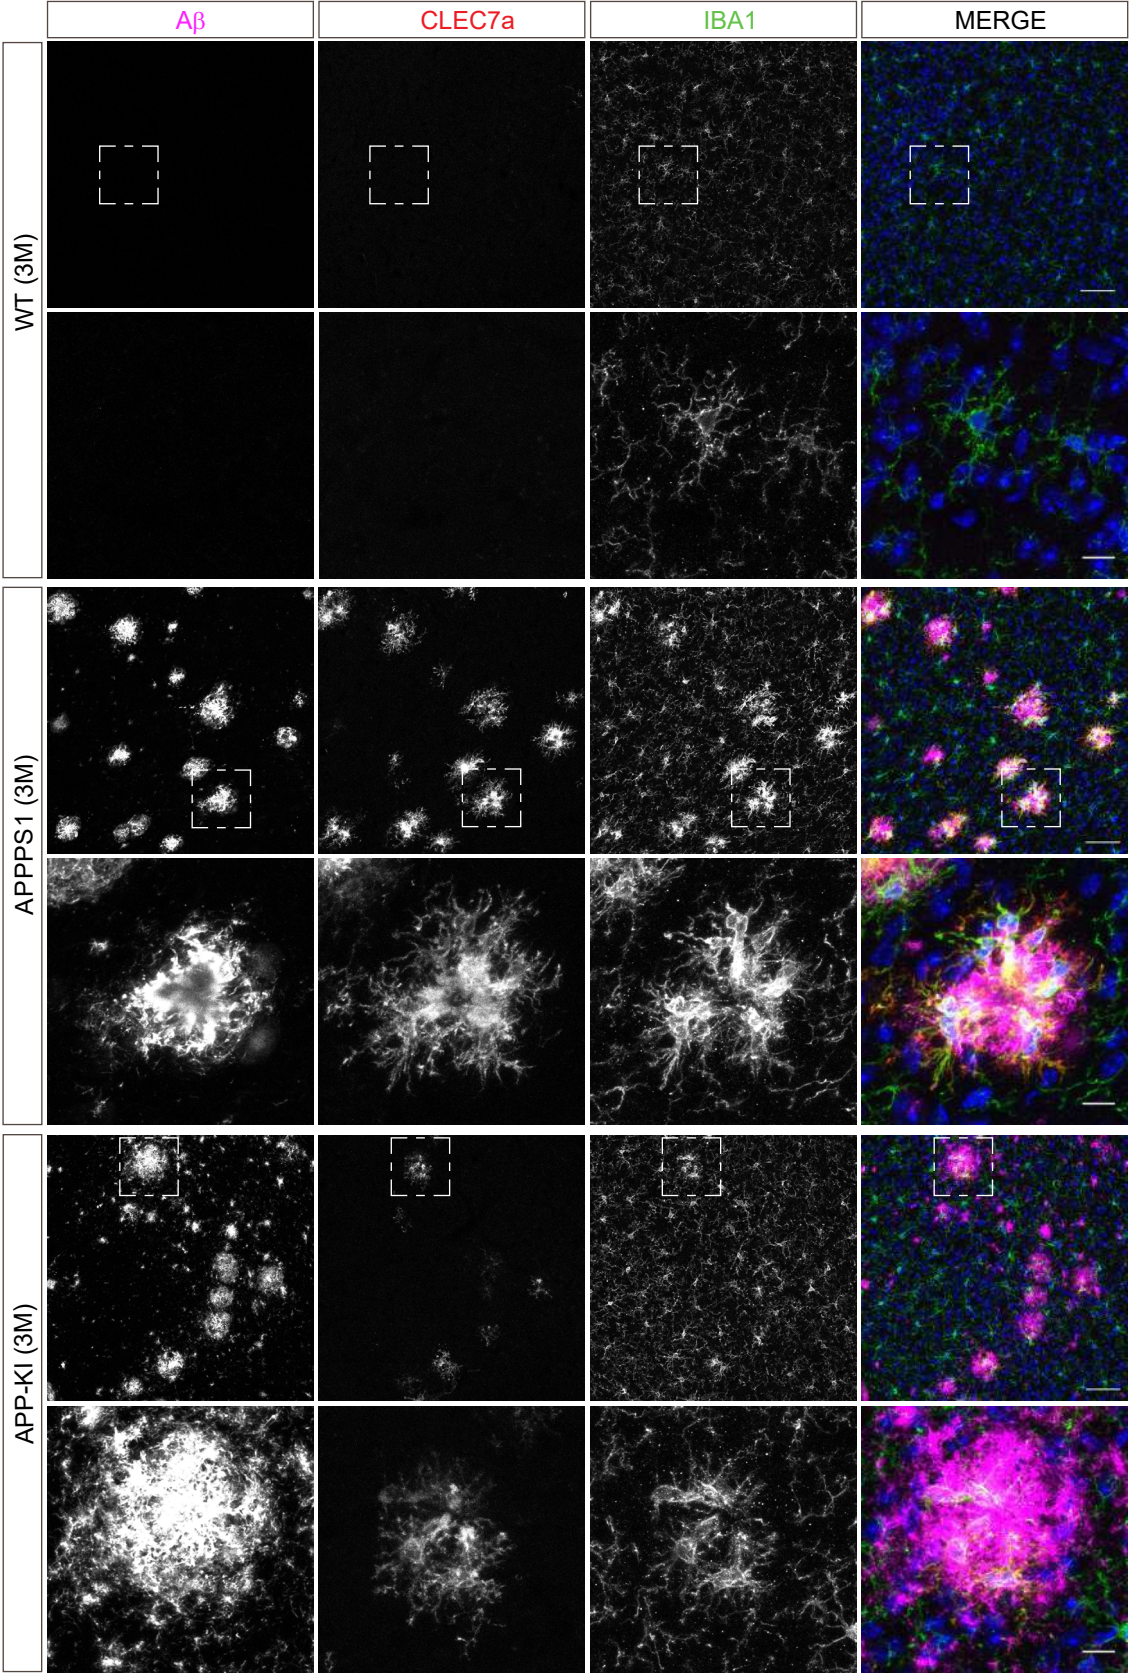

Fig 4



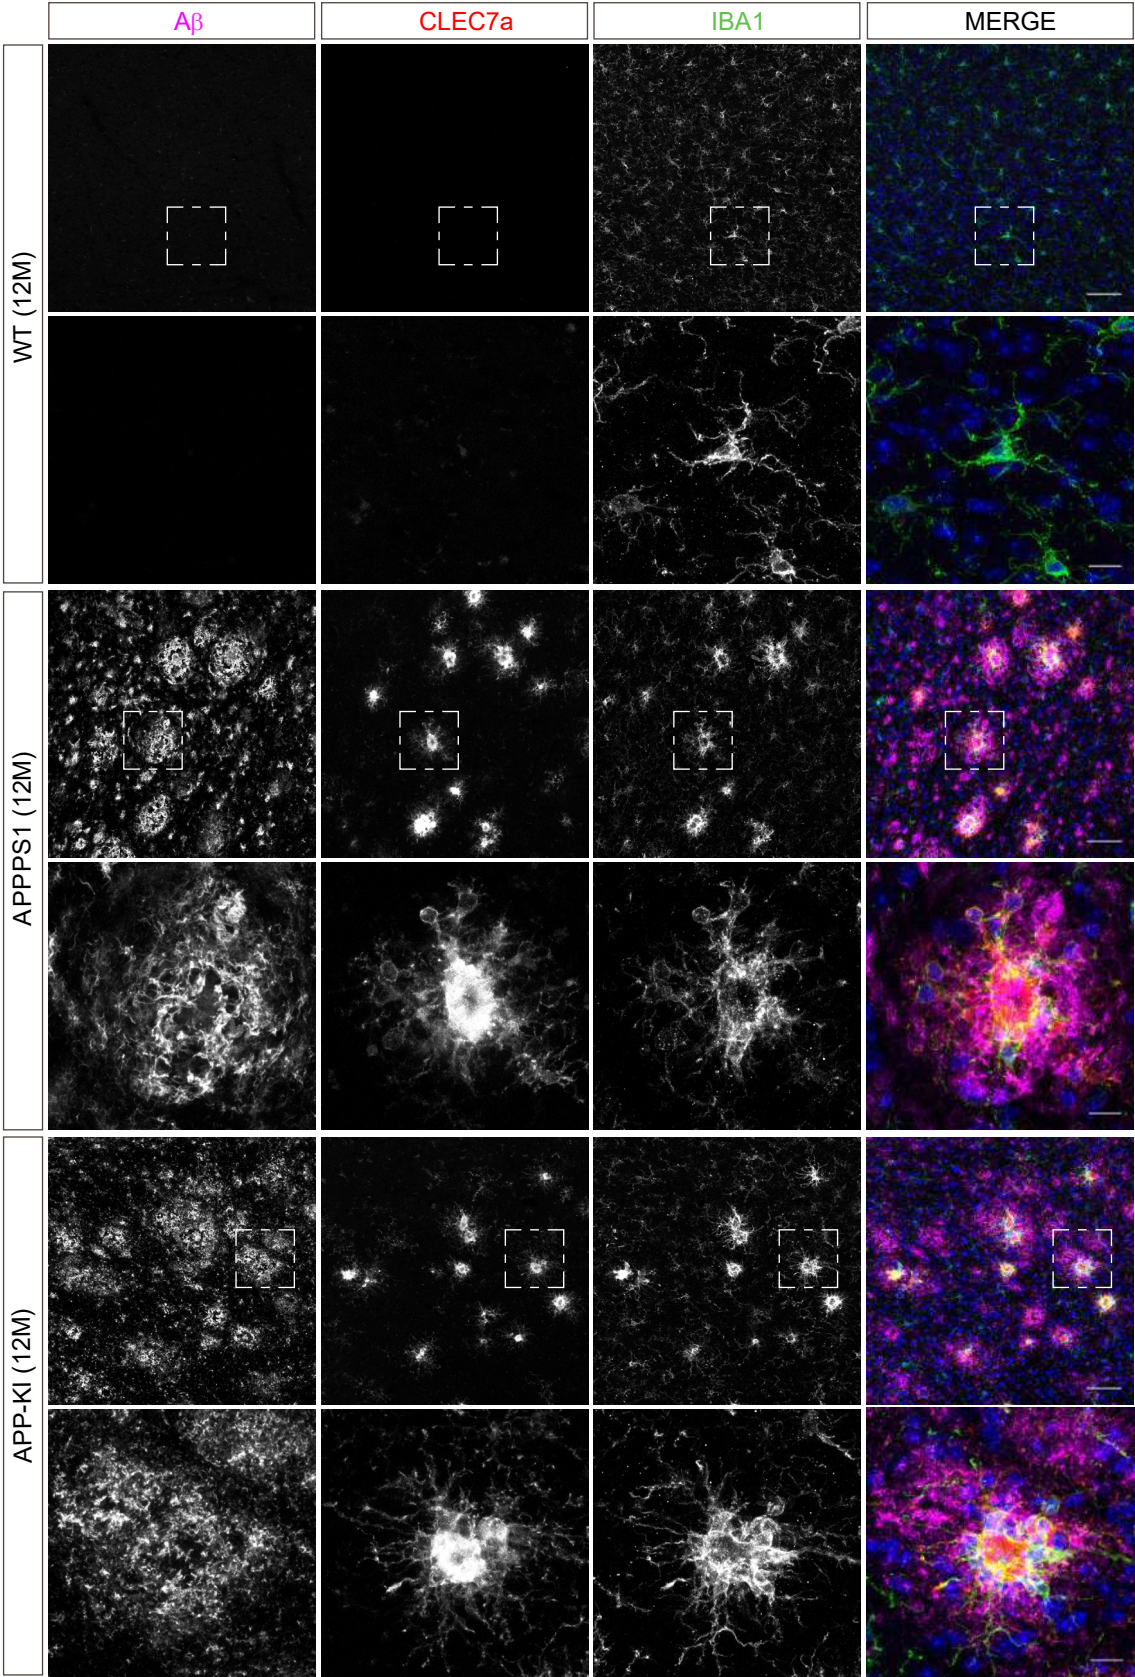

Fig 5



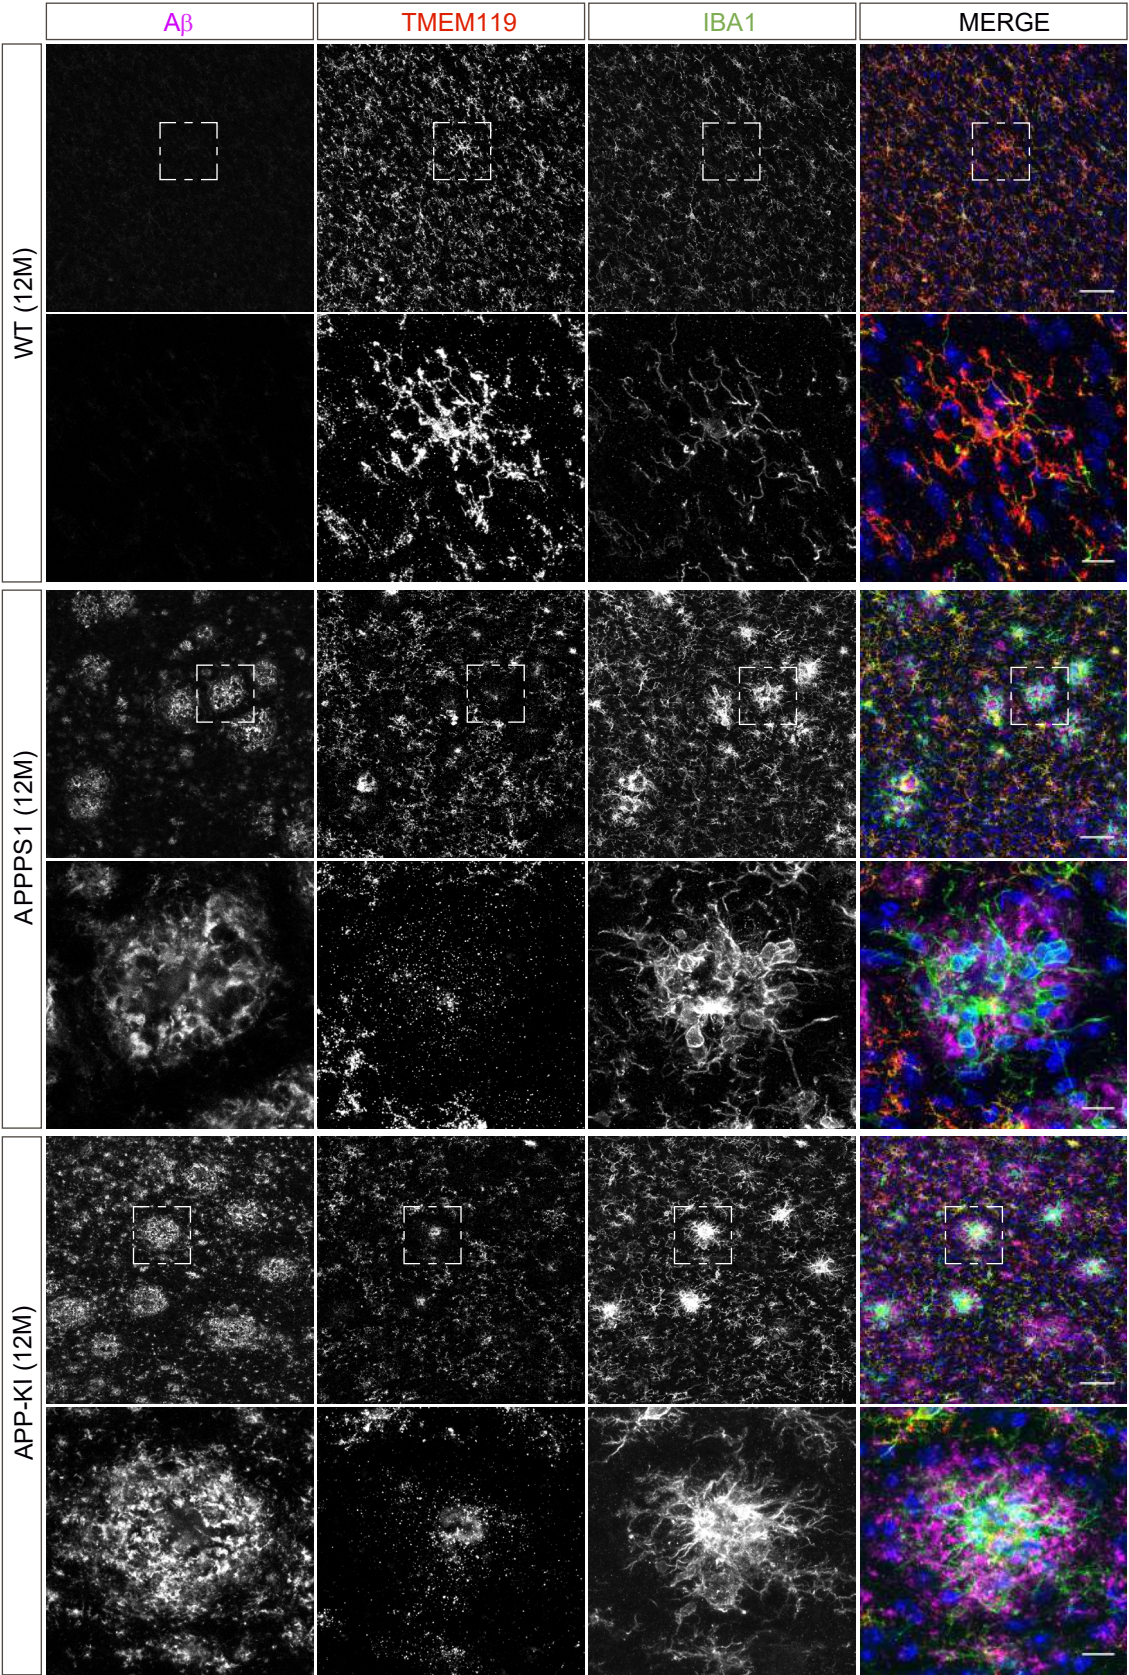

Fig 6



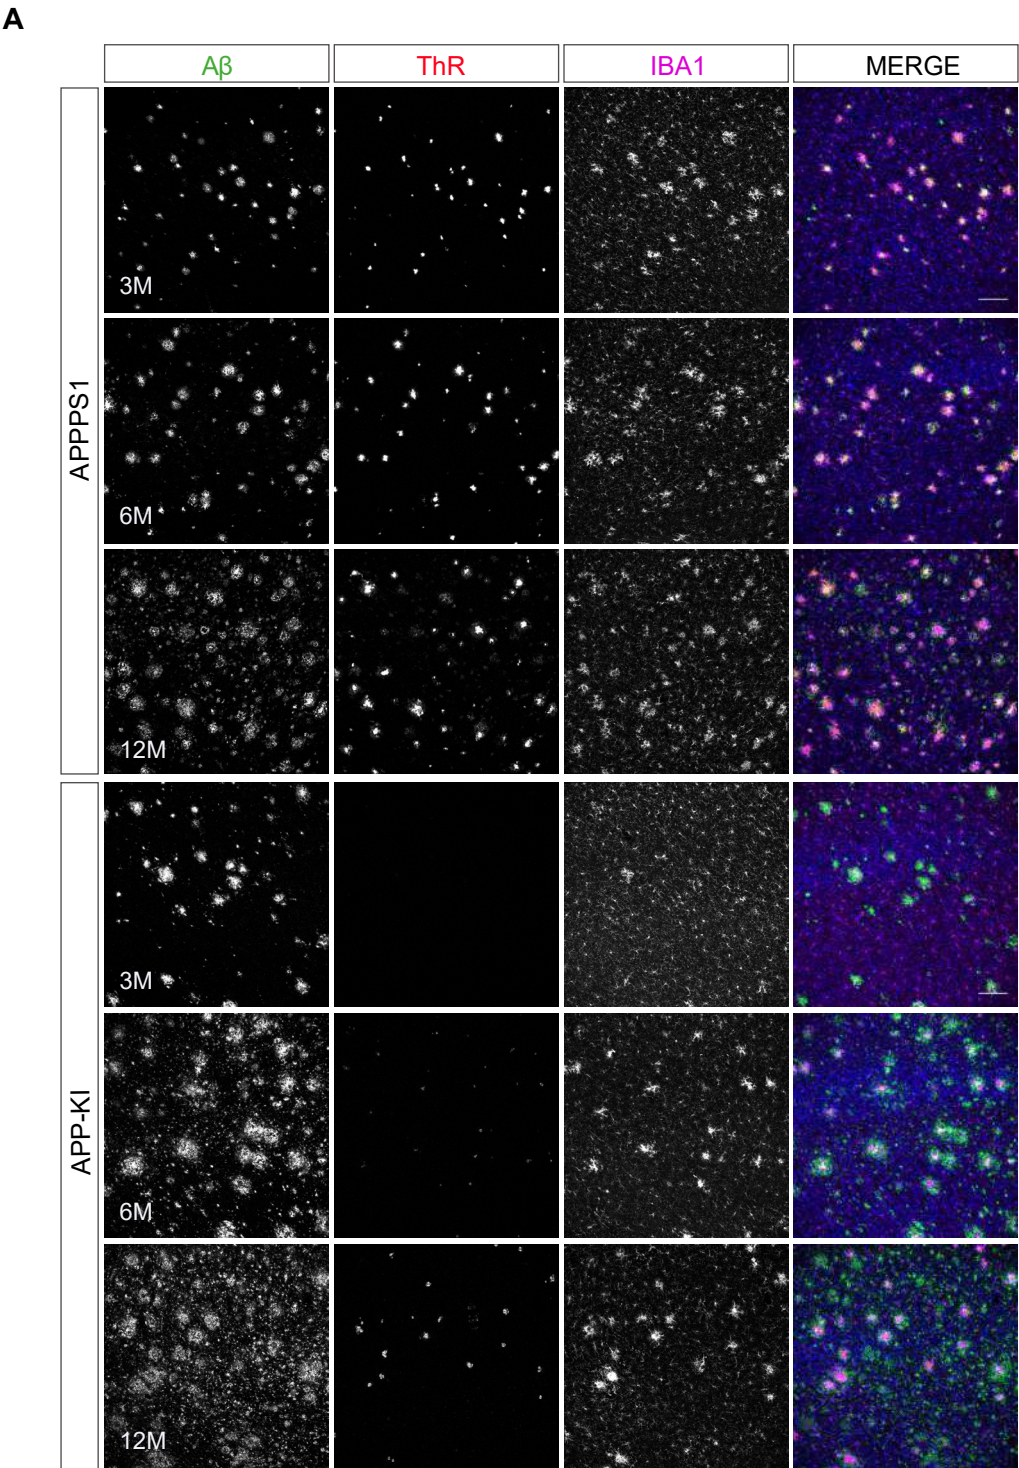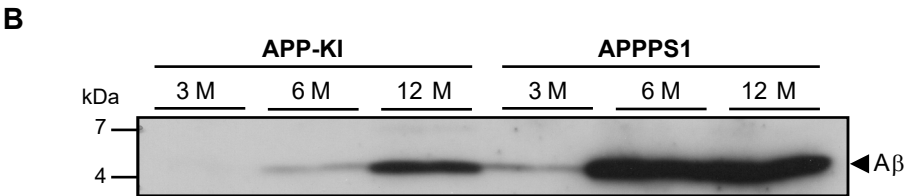

Fig 7

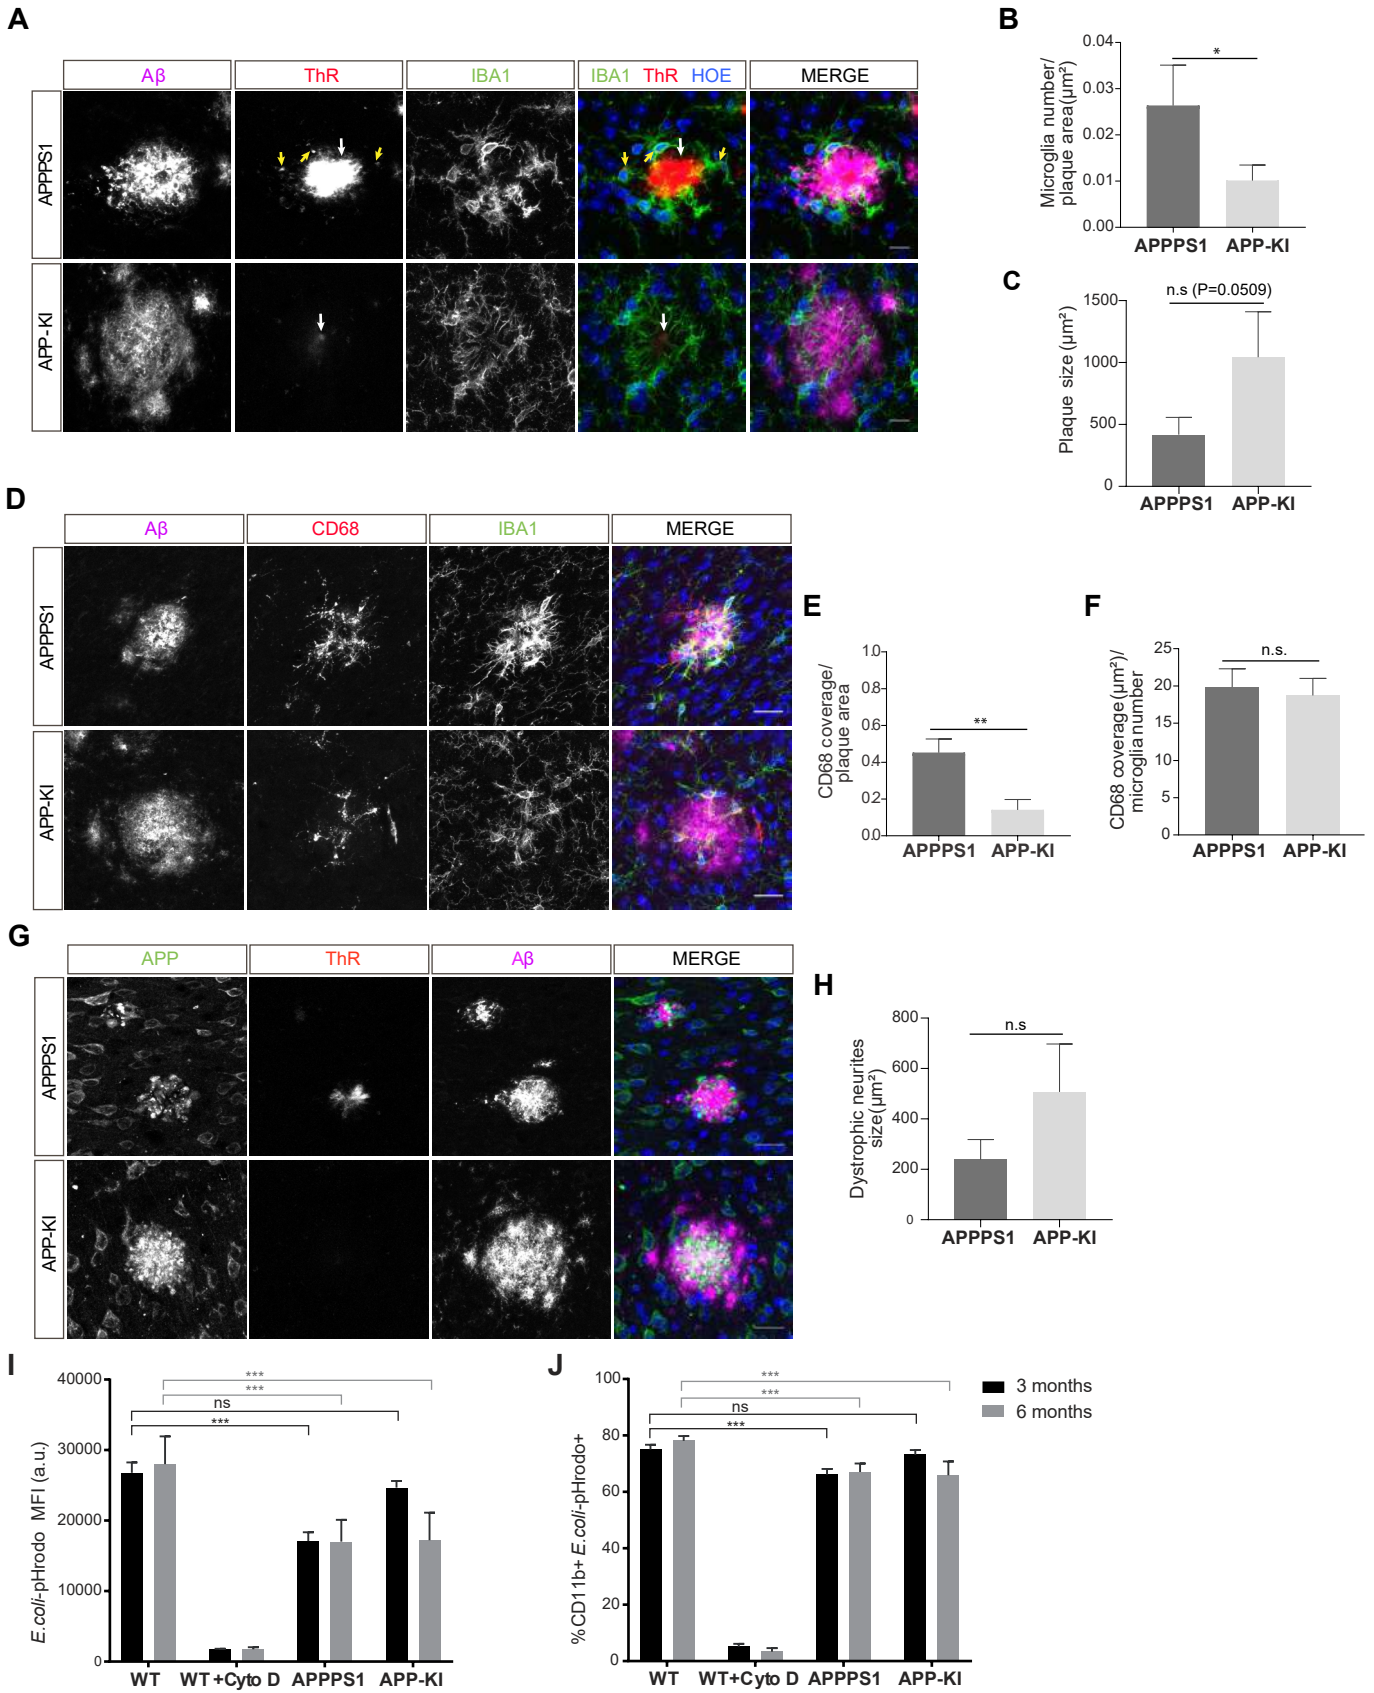

Fig 8

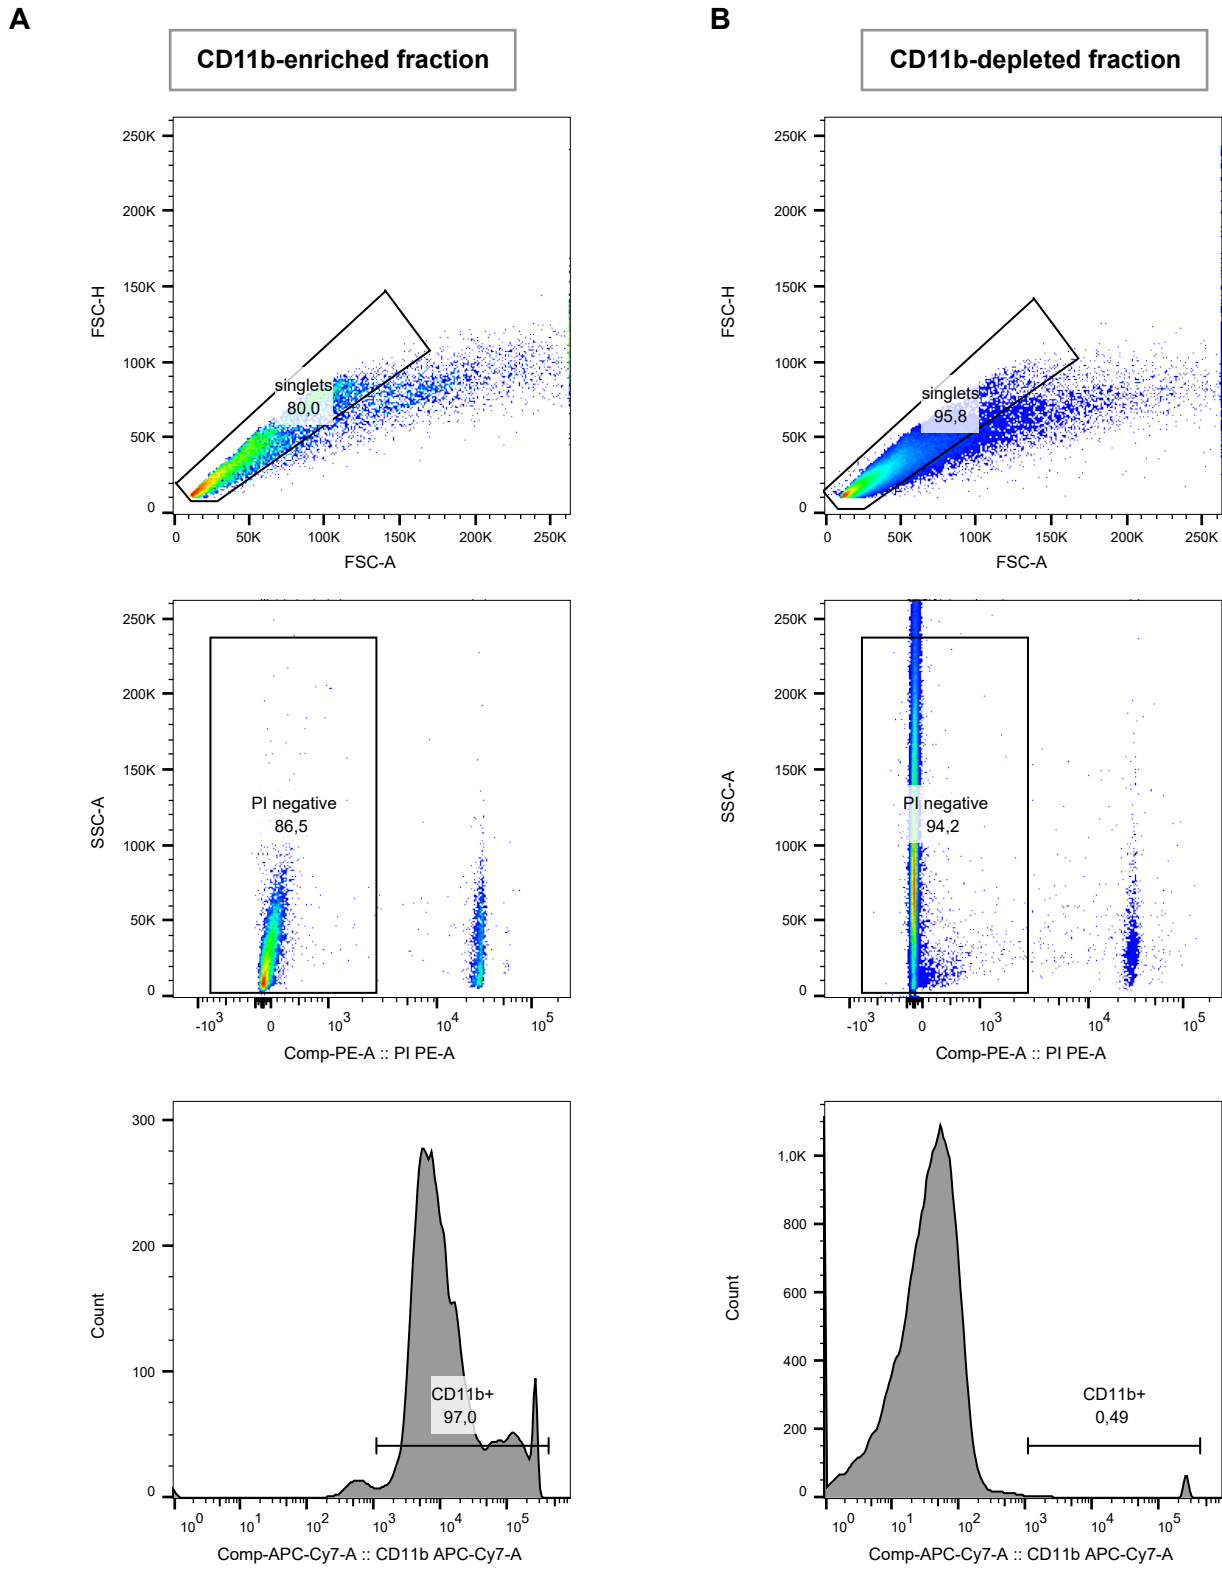

**A** bioRxiv preprint doi: <https://doi.org/10.1101/861146>; this version posted December 2, 2019. The copyright holder for this preprint (which was not certified by peer review) is the author/funder. All rights reserved. No reuse allowed without permission.

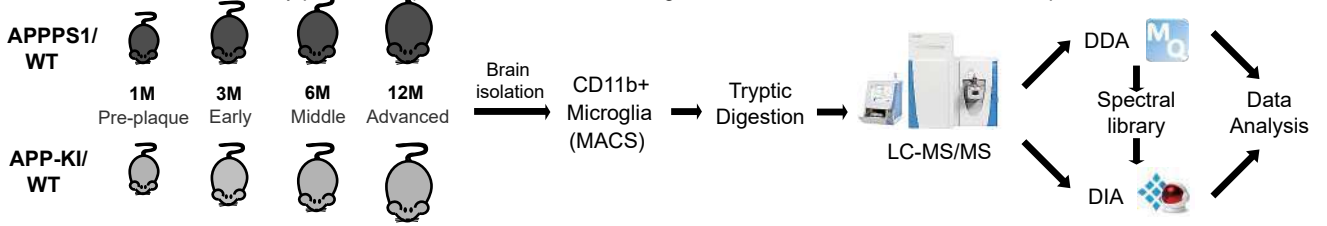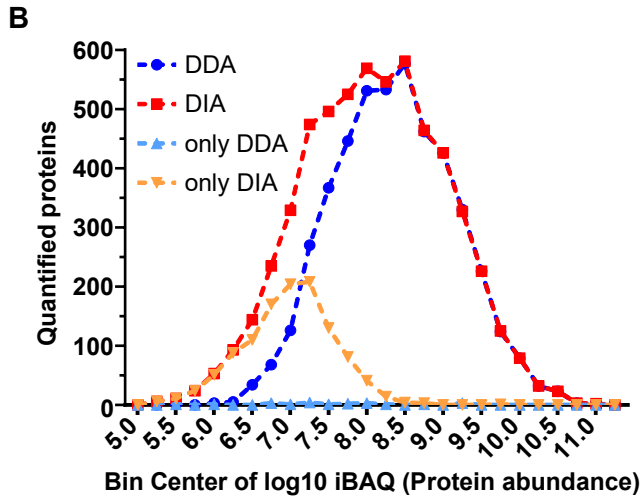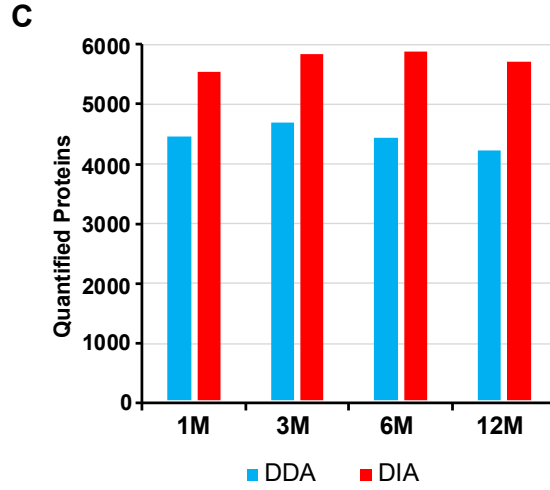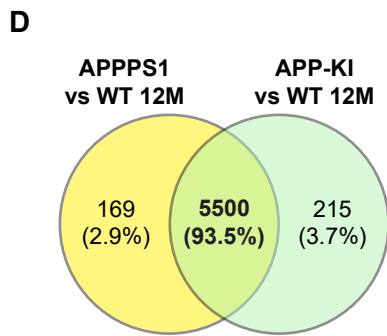



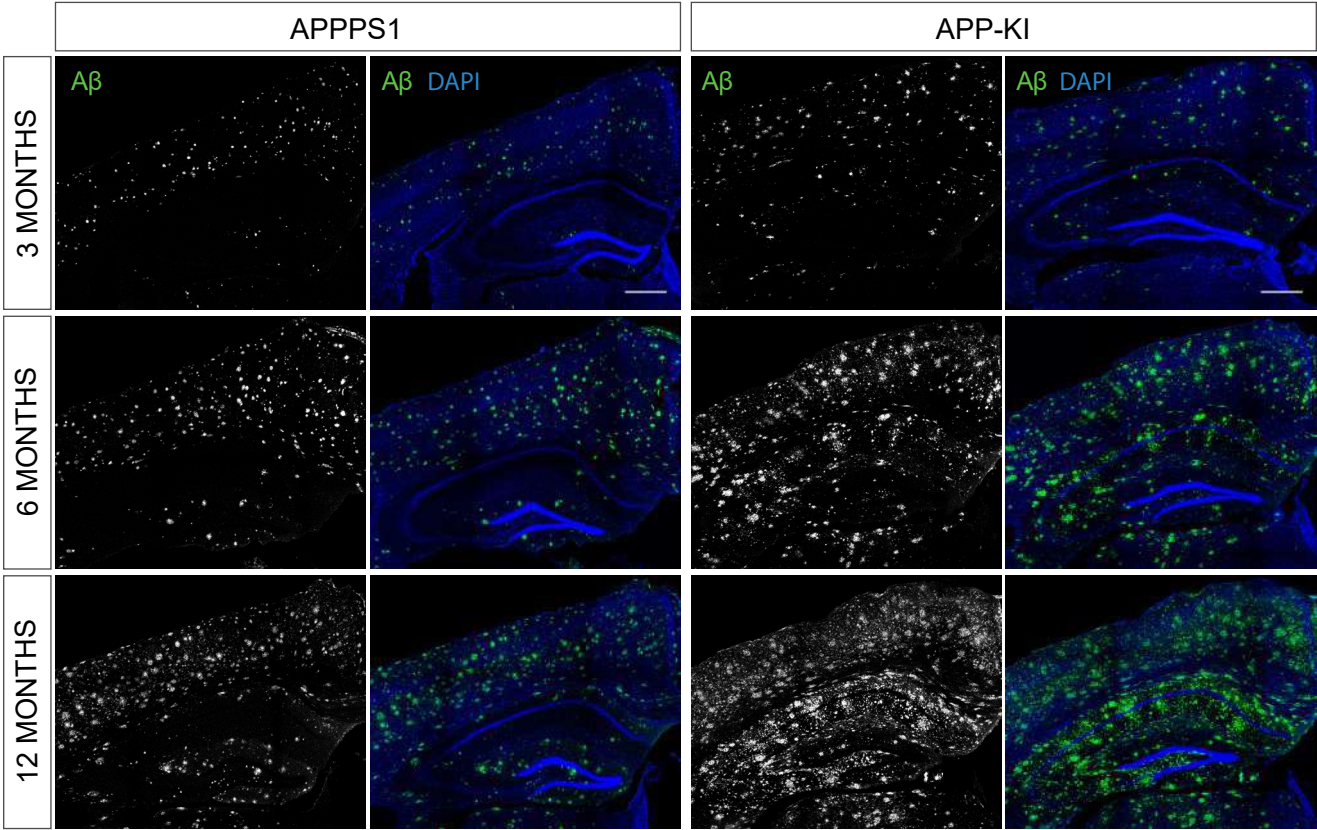



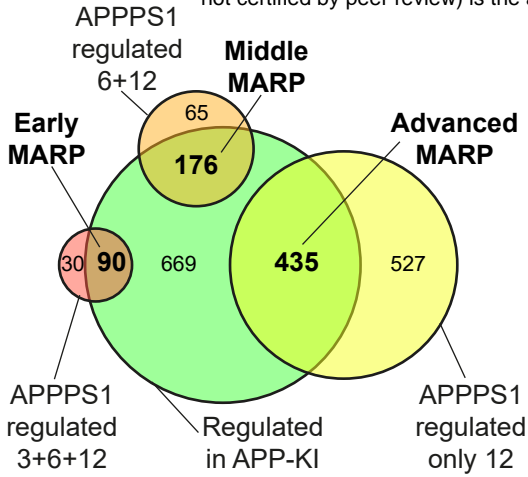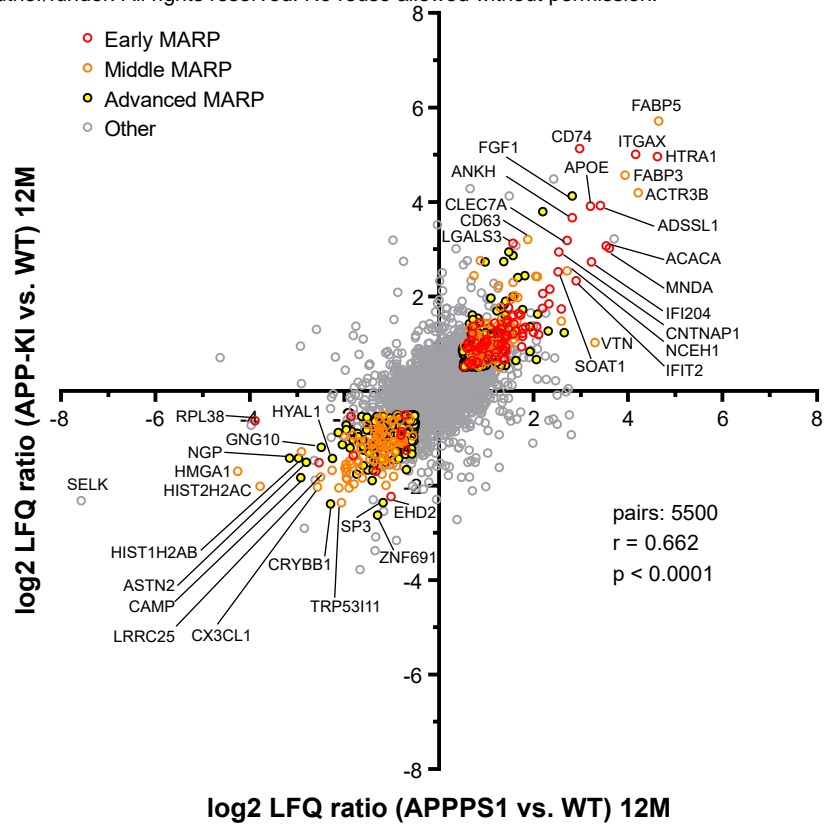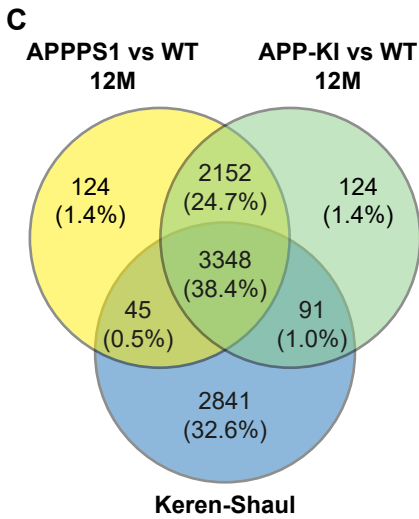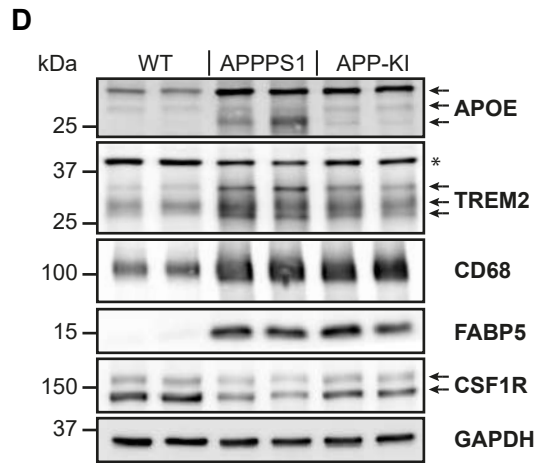

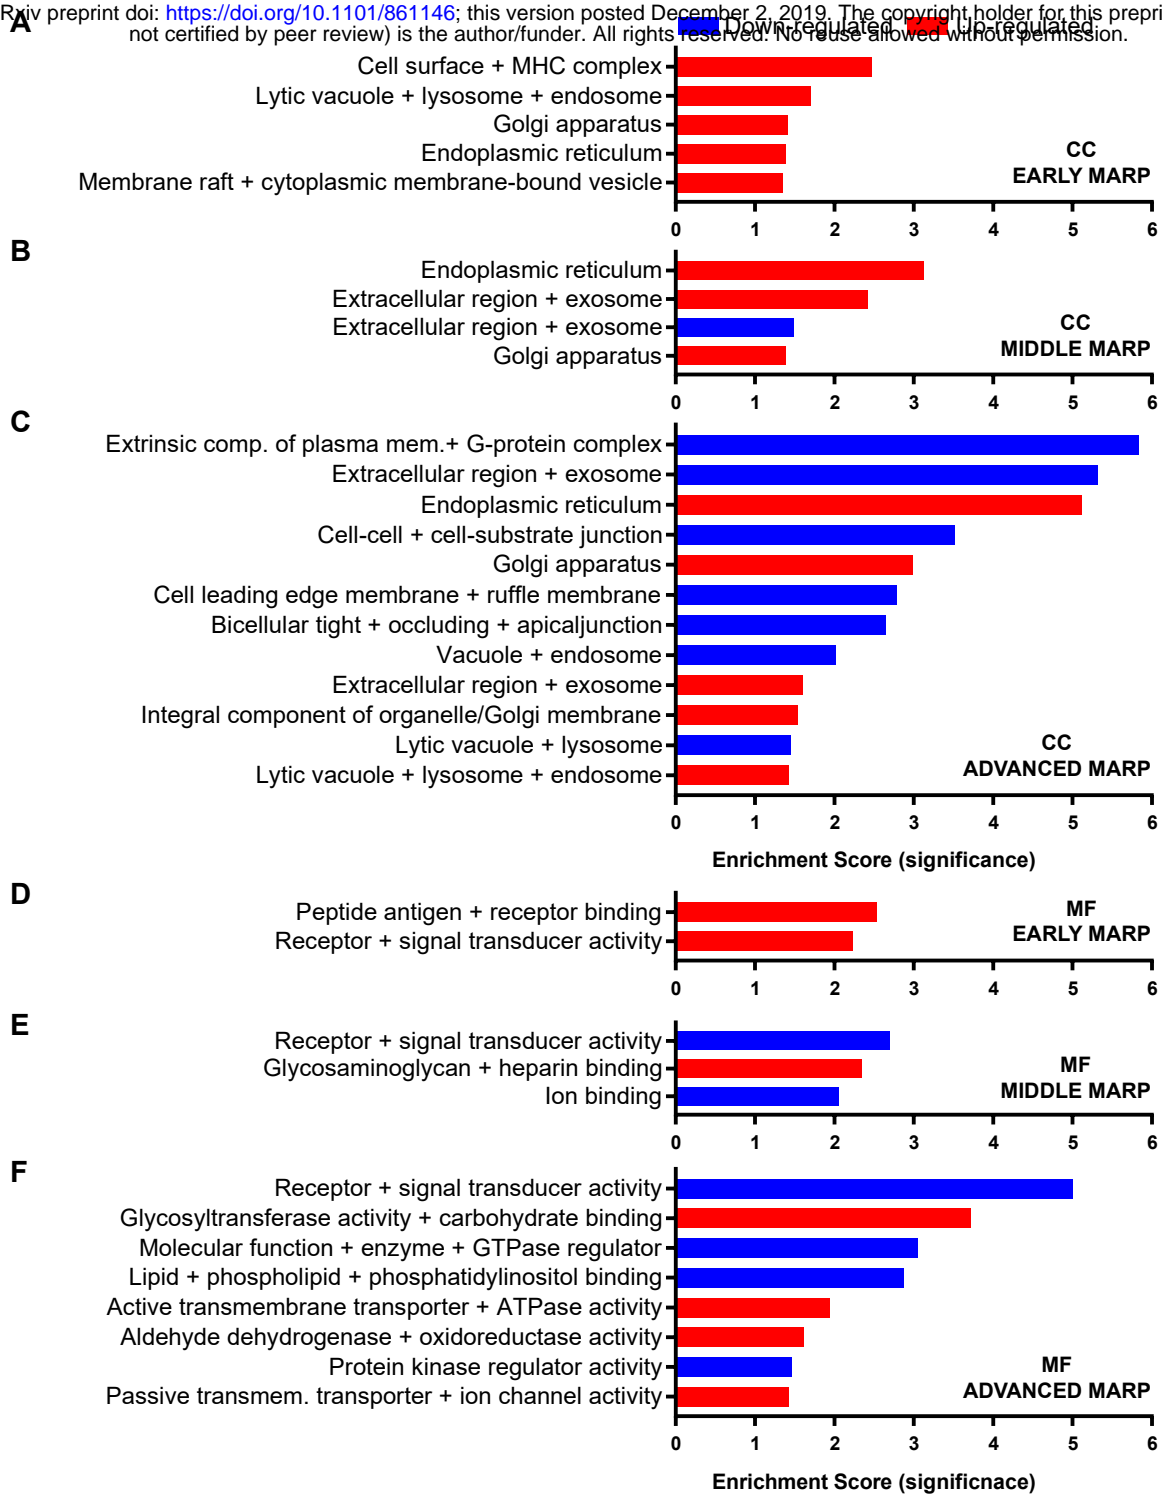

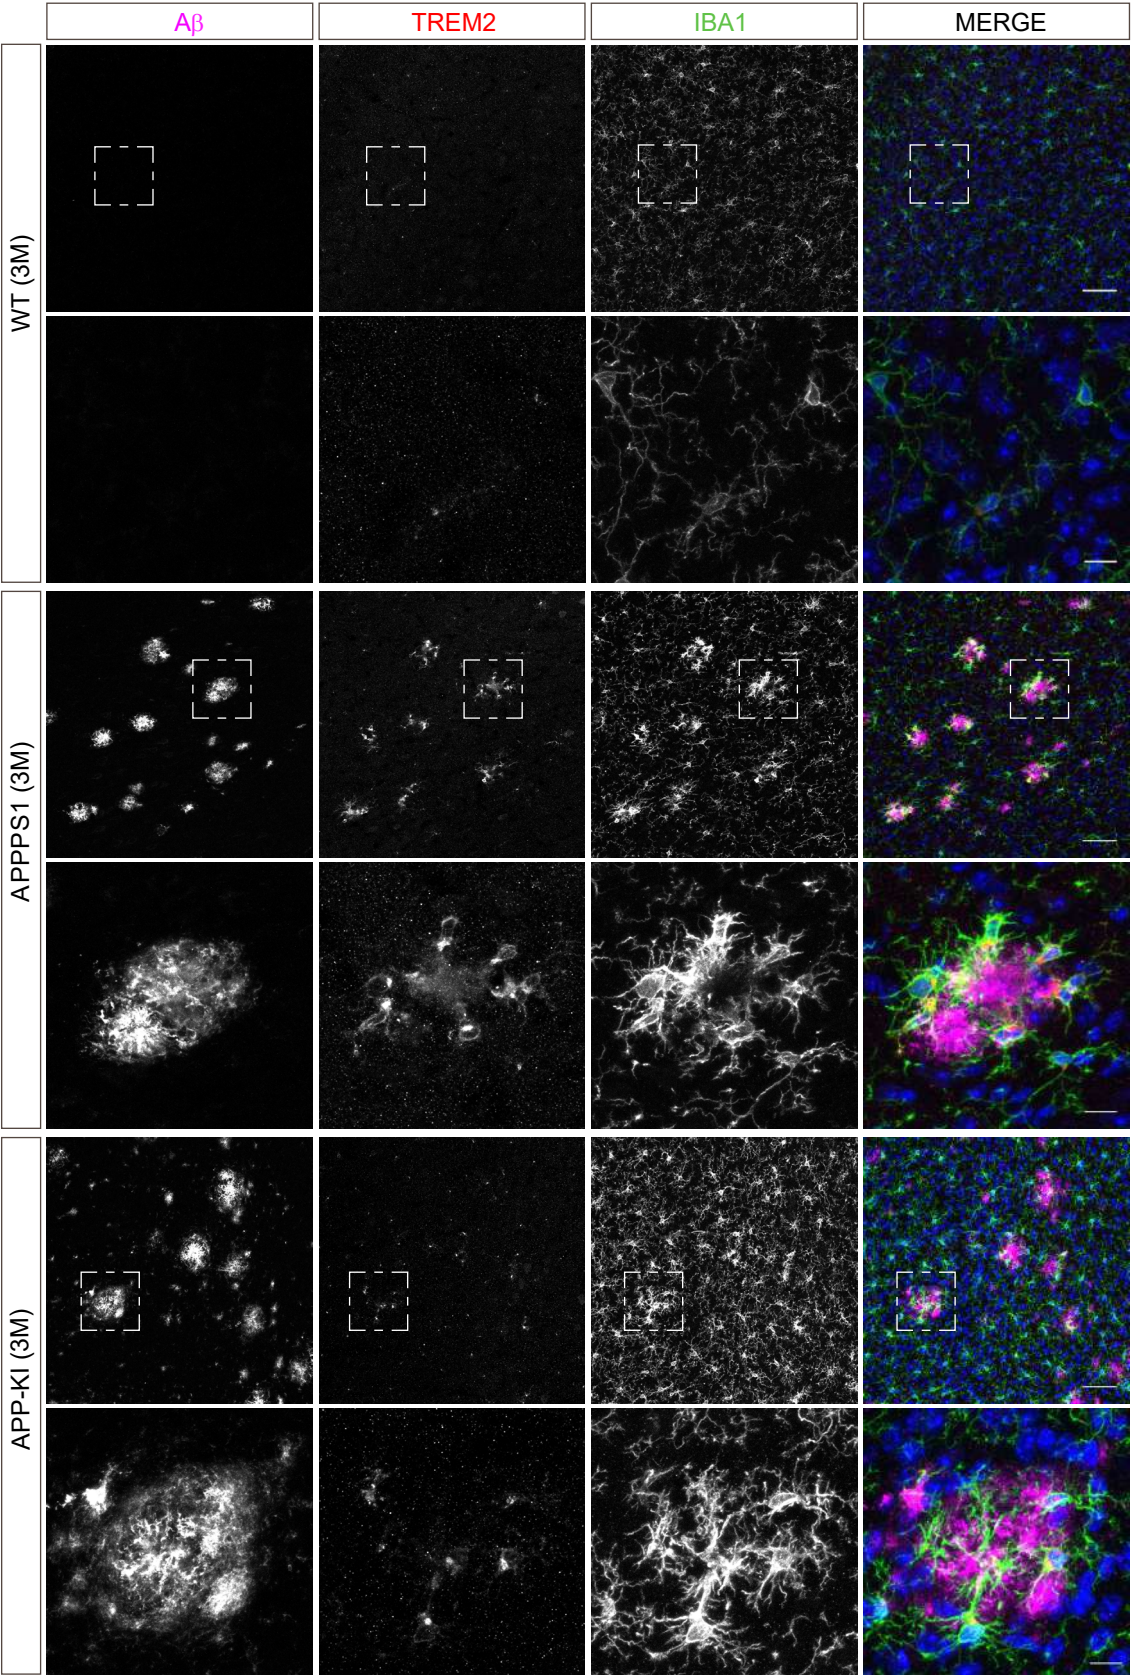

Suppl. Fig 6



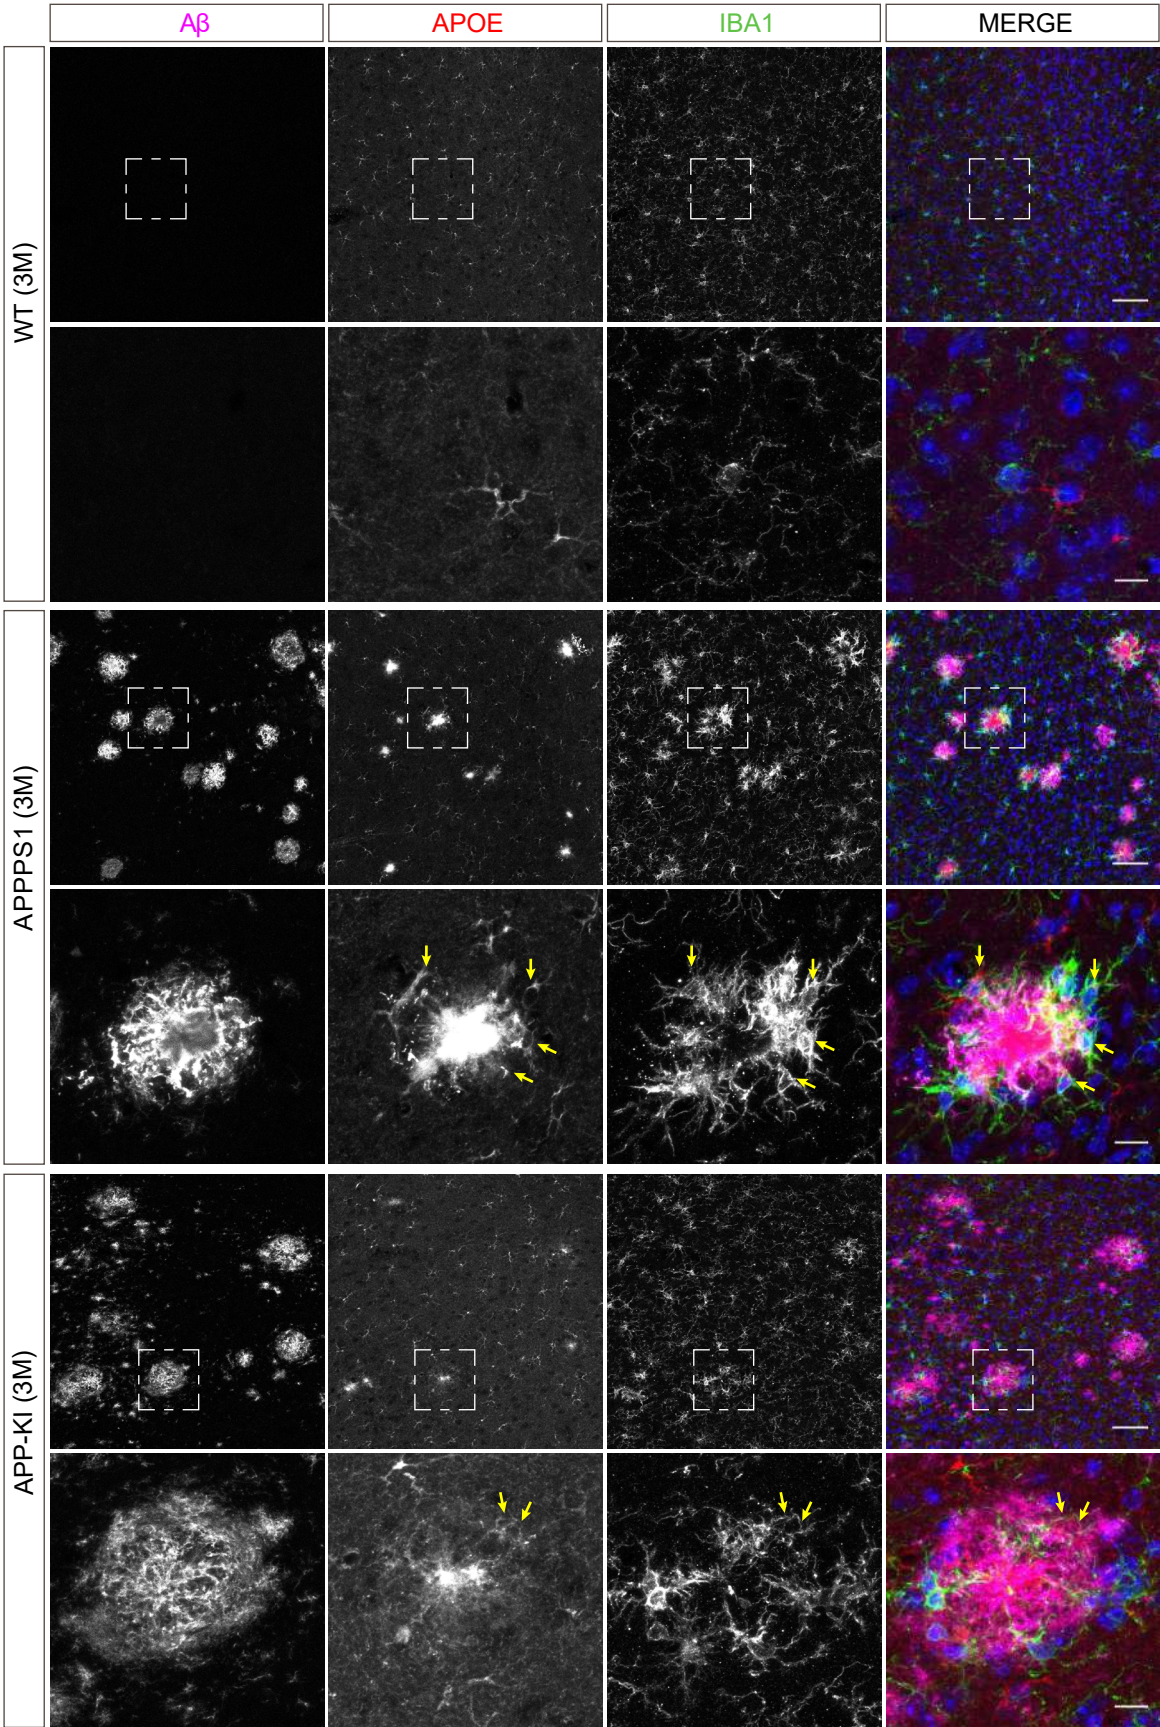

Suppl. Fig 7

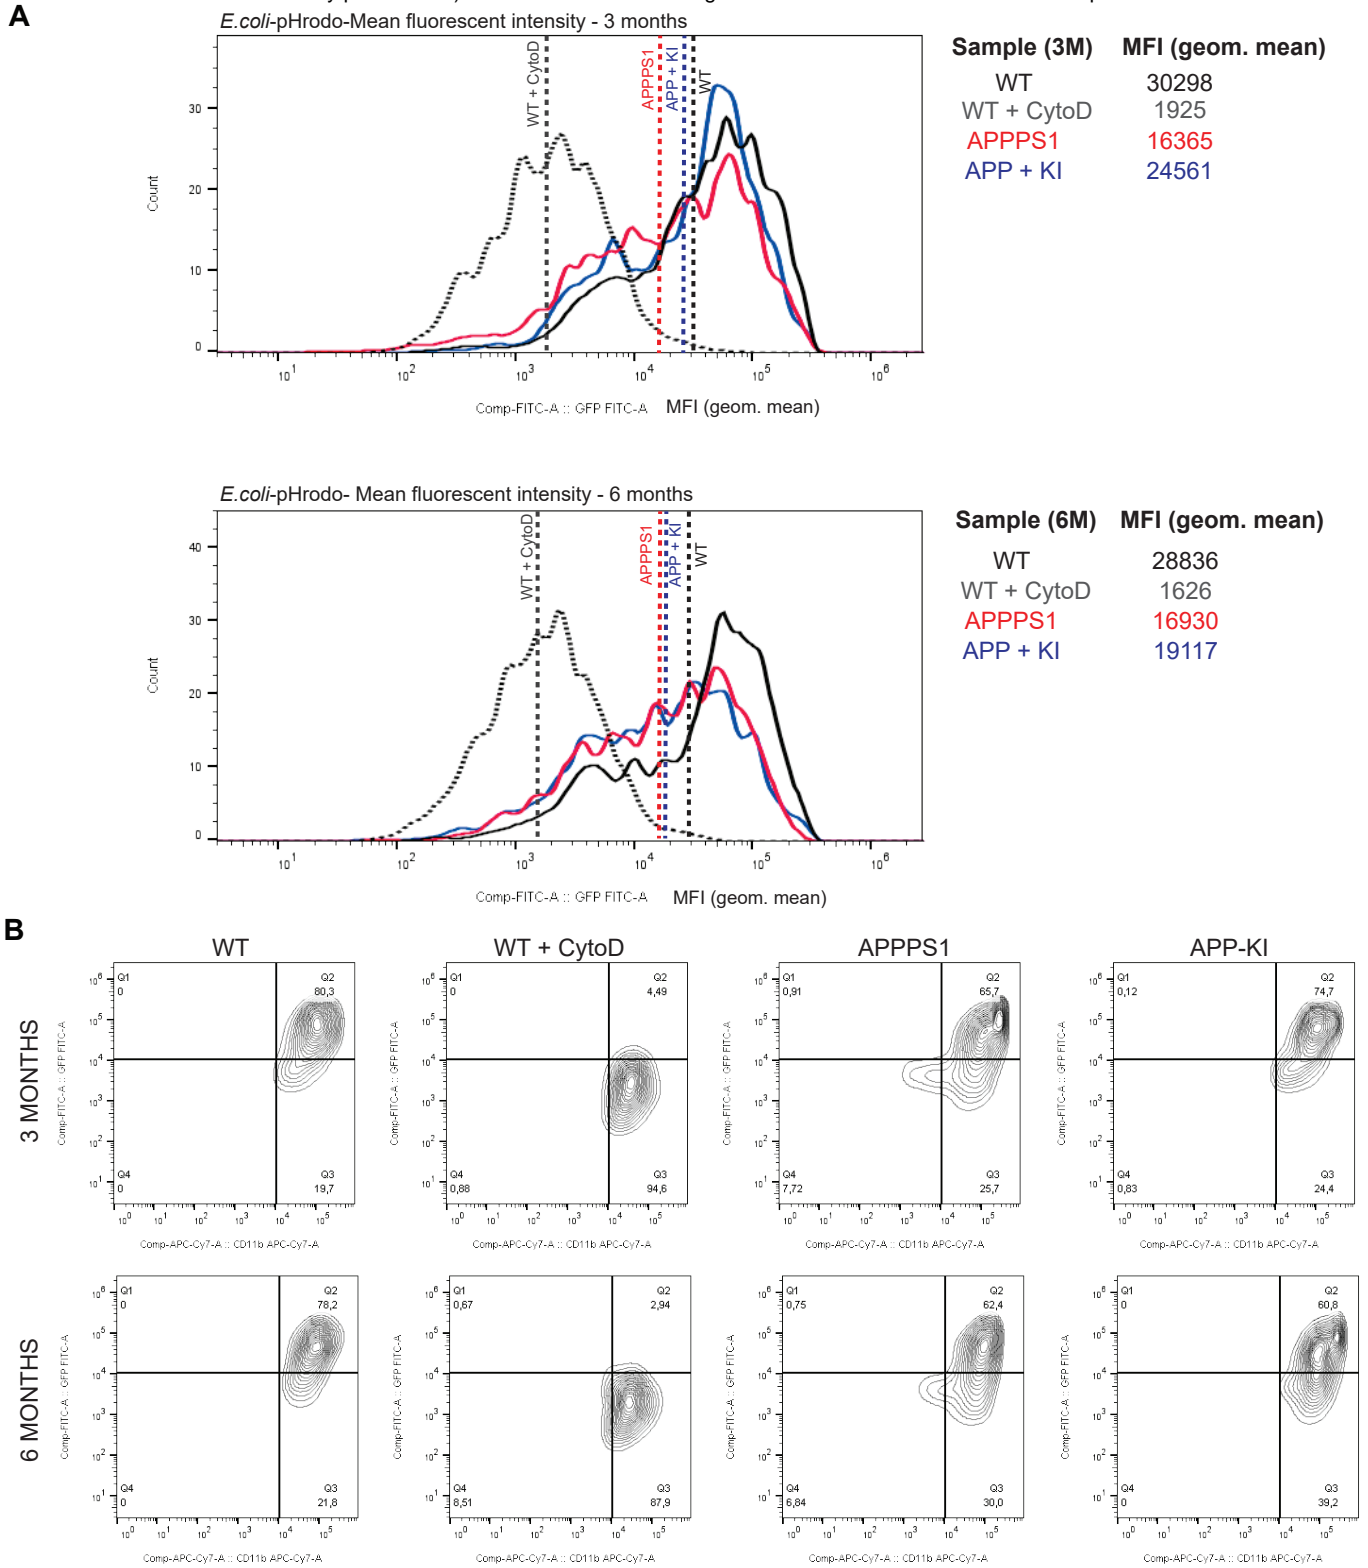



## Supplementary Tables

**Suppl. Table 1:** Optimized mass to charge ( $m/z$ ) window distribution for Sequential Window Acquisition of all theoretical Mass Spectra (SWATH-MS) based on DIA.

| Window | $m/z$ start | $m/z$ end | Center | Isolation width [ $m/z$ ] |
|--------|-------------|-----------|--------|---------------------------|
| 1      | 300         | 360       | 330    | 60                        |
| 2      | 359         | 399       | 379    | 40                        |
| 3      | 398         | 428       | 413    | 30                        |
| 4      | 427         | 452       | 439.5  | 25                        |
| 5      | 451         | 475       | 463    | 24                        |
| 6      | 474         | 497       | 485.5  | 23                        |
| 7      | 496         | 518       | 507    | 22                        |
| 8      | 517         | 539       | 528    | 22                        |
| 9      | 538         | 560       | 549    | 22                        |
| 10     | 559         | 581       | 570    | 22                        |
| 11     | 580         | 602       | 591    | 22                        |
| 12     | 601         | 623       | 612    | 22                        |
| 13     | 622         | 646       | 634    | 24                        |
| 14     | 645         | 669       | 657    | 24                        |
| 15     | 668         | 694       | 681    | 26                        |
| 16     | 693         | 719       | 706    | 26                        |
| 17     | 718         | 746       | 732    | 28                        |
| 18     | 745         | 777       | 761    | 32                        |
| 19     | 776         | 808       | 792    | 32                        |
| 20     | 807         | 839       | 823    | 32                        |
| 21     | 838         | 870       | 854    | 32                        |
| 22     | 869         | 904       | 886.5  | 35                        |
| 23     | 903         | 943       | 923    | 40                        |
| 24     | 942         | 1,122     | 1,032  | 180                       |
| 25     | 1,121       | 1,401     | 1,261  | 280                       |

**Suppl. Table 2:** Comparison of proteomic results of APPPS1 microglia from DDA and DIA including the average peptide IDs, protein IDs, protein quantifications calculated for all samples, numbers of relatively quantified proteins from 1, 3, 6, and 12 months as well as their averages.

|                                                           | DDA   | DIA   | DIA vs DDA |
|-----------------------------------------------------------|-------|-------|------------|
| <b>Overall Average Peptide IDs</b>                        | 53912 | 74281 | 137.8%     |
| <b>Overall Average Protein IDs</b>                        | 5502  | 5953  | 108.2%     |
| <b>Overall Average Protein Quantifications</b>            | 5053  | 5952  | 117.8%     |
| <b>Relative quantifications (3 vs 3) APPPS1 vs WT 1M</b>  | 4425  | 5491  | 124.1%     |
| <b>Relative quantifications (3 vs 3) APPPS1 vs WT 3M</b>  | 4646  | 5789  | 124.6%     |
| <b>Relative quantifications (3 vs 3) APPPS1 vs WT 6M</b>  | 4391  | 5848  | 133.2%     |
| <b>Relative quantifications (3 vs 3) APPPS1 vs WT 12M</b> | 4185  | 5669  | 135.5%     |
| <b>Average of relative quantifications</b>                | 4412  | 5699  | 129.3%     |

**Suppl. Table 3:** Quantitative proteomic data analysis of APPPS1 (A) and APP-KI (B) *versus* WT microglia at 1, 3, 6, and 12 months using DIA. The table shows the number of consistently quantified proteins as well as proteins with a significant up- or down-regulation with and without FDR correction. A log<sub>2</sub> fold change > 0.5 or < -0.5 and a p-value of less than 0.05 were applied as regulation thresholds. The amount of up-and down-regulated proteins with FDR correction is shown as percentage from the total number of quantified proteins.

**A**

|                                         | APPPS1 vs WT 1M | APPPS1 vs WT 3M | APPPS1 vs WT 6M | APPPS1 vs WT 12M |
|-----------------------------------------|-----------------|-----------------|-----------------|------------------|
| <b>Quantifications (3 vs 3)</b>         | 5491            | 5789            | 5848            | 5669             |
| <b>Regulated</b>                        | 98              | 1010            | 679             | 1409             |
| <b>Up-regulated</b>                     | 76              | 332             | 365             | 776              |
| <b>Down-regulated</b>                   | 22              | 678             | 314             | 633              |
| <b>Up-regulated FDR corrected</b>       | 0               | 332             | 309             | 776              |
| <b>Down-regulated FDR corrected</b>     | 0               | 678             | 261             | 633              |
| <b>Up-regulated FDR corrected (%)</b>   | 0.0%            | 5.7%            | 5.3%            | 13.7%            |
| <b>Down-regulated FDR corrected (%)</b> | 0.0%            | 11.7%           | 4.5%            | 11.2%            |

**B**

|                                         | APP-KI vs WT 1M | APP-KI vs WT 3M | APP-KI vs WT 6M | APP-KI vs WT 12M |
|-----------------------------------------|-----------------|-----------------|-----------------|------------------|
| <b>Quantifications (3 vs 3)</b>         | 5713            | 5711            | 5653            | 5715             |
| <b>Regulated</b>                        | 41              | 700             | 559             | 1337             |
| <b>Up-regulated</b>                     | 19              | 22              | 245             | 704              |
| <b>Down-regulated</b>                   | 54              | 109             | 267             | 666              |
| <b>Up-regulated FDR corrected</b>       | 0               | 1               | 140             | 704              |
| <b>Down-regulated FDR corrected</b>     | 0               | 0               | 151             | 666              |
| <b>Up-regulated FDR corrected (%)</b>   | 0.0%            | 0.0%            | 2.5%            | 12.3%            |
| <b>Down-regulated FDR corrected (%)</b> | 0.0%            | 0.0%            | 2.7%            | 11.7%            |

**Suppl. Table 4:** Identified early, middle, and advanced MARPs. Protein groups are represented by the major UniProt accession.

| Gene Name | UniProt Accession | Protein Name                                                   | MARPs (up: +1; down: -1) |             |               |
|-----------|-------------------|----------------------------------------------------------------|--------------------------|-------------|---------------|
|           |                   |                                                                | Early MARP               | Middle MARP | Advanced MARP |
| Aacs      | Q9D2R0            | Acetoacetyl-CoA synthetase                                     | 0                        | 1           | 0             |
| Aagab     | Q8R2R3            | Alpha- and gamma-adaptin-binding protein p34                   | 0                        | 0           | -1            |
| Aak1      | Q3UHQ0            | AP2-associated protein kinase 1                                | 0                        | 0           | 1             |
| Aarsd1    | Q3THG9            | Alanyl-tRNA editing protein Aarsd1                             | 0                        | 0           | 1             |
| Abca9     | Q8K449            | ATP-binding cassette sub-family A member 9                     | 0                        | -1          | 0             |
| Abcb1b    | P06795            | Multidrug resistance protein 1B                                | 0                        | 1           | 0             |
| Abcd2     | Q61285            | ATP-binding cassette sub-family D member 2                     | 0                        | 1           | 0             |
| Abcg3     | Q99P81            | ATP-binding cassette sub-family G member 3                     | 0                        | 0           | 1             |
| Abhd15    | Q5F2F2            | Protein ABHD15                                                 | 0                        | -1          | 0             |
| Abi1      | Q8CBW3            | Abl interactor 1                                               | 0                        | 0           | -1            |
| Abi3      | Q8BYZ1            | ABI gene family member 3                                       | 0                        | 0           | -1            |
| Acaca     | Q5SWU9            | Acetyl-CoA carboxylase 1                                       | 1                        | 0           | 0             |
| Acbd3     | Q8BMP6            | Golgi resident protein GCP60                                   | 0                        | 0           | 1             |
| Acot11    | Q8VHQ9            | Acyl-coenzyme A thioesterase 11                                | 0                        | 0           | 1             |
| Acox3     | Q9EPL9            | Peroxisomal acyl-coenzyme A oxidase 3                          | 0                        | 1           | 0             |
| Acsbg1    | Q99PU5            | Long-chain-fatty-acid--CoA ligase ACSBG1                       | 0                        | 0           | 1             |
| Acss2     | Q9QXG4            | Acetyl-coenzyme A synthetase, cytoplasmic                      | 0                        | 0           | 1             |
| Actn1     | Q7TPR4            | Alpha-actinin-1                                                | 0                        | -1          | 0             |
| Actn4     | P57780            | Alpha-actinin-4                                                | 0                        | 0           | -1            |
| Actr3b    | Q641P0            | Actin-related protein 3B                                       | 0                        | 1           | 0             |
| Ada       | P03958            | Adenosine deaminase                                            | 0                        | -1          | 0             |
| Adam15    | O88839            | Disintegrin and metalloproteinase domain-containing protein 15 | 0                        | 0           | -1            |
| Adam22    | Q9R1V6            | Disintegrin and metalloproteinase domain-containing protein 22 | 0                        | 0           | 1             |
| Adap2     | Q8R2V5            | Arf-GAP with dual PH domain-containing protein 2               | 0                        | -1          | 0             |
| Add2      | Q9QYB8            | Beta-adducin                                                   | 0                        | 0           | 1             |
| Adgre1    | Q61549            | Adhesion G protein-coupled receptor E1                         | 0                        | -1          | 0             |
| Adk       | P55264            | Adenosine kinase                                               | 0                        | 0           | 1             |
| Adss      | P46664            | Adenylosuccinate synthetase isozyme 2                          | 0                        | 1           | 0             |
| Adssl1    | P28650            | Adenylosuccinate synthetase isozyme 1                          | 1                        | 0           | 0             |

| Gene Name | UniProt Accession | Protein Name                                                                  | MARPs (up: +1; down: -1) |             |               |
|-----------|-------------------|-------------------------------------------------------------------------------|--------------------------|-------------|---------------|
|           |                   |                                                                               | Early MARP               | Middle MARP | Advanced MARP |
| Ahcy      | P50247            | Adenosylhomocysteinase                                                        | 0                        | 0           | 1             |
| Aif1      | O70200            | Allograft inflammatory factor 1                                               | 0                        | 0           | -1            |
| Akap5     | D3YVF0            | A-kinase anchor protein 5                                                     | 0                        | 0           | 1             |
| Akt3      | Q9WUA6            | RAC-gamma serine/threonine-protein kinase                                     | 0                        | 0           | 1             |
| Alb       | P07724            | Serum albumin                                                                 | 0                        | -1          | 0             |
| Aldh1b1   | Q9CZS1            | Aldehyde dehydrogenase X, mitochondrial                                       | 0                        | 0           | 1             |
| Aldh1l1   | Q8R0Y6            | Cytosolic 10-formyltetrahydrofolate dehydrogenase                             | 0                        | 0           | 1             |
| Aldh1l2   | Q8K009            | Mitochondrial 10-formyltetrahydrofolate dehydrogenase                         | 0                        | 0           | 1             |
| Aldh2     | P47738            | Aldehyde dehydrogenase, mitochondrial                                         | 0                        | 0           | 1             |
| Aldoa     | P05064            | Fructose-bisphosphate aldolase A                                              | 0                        | 1           | 0             |
| Alg10b    | Q3UGP8            | Putative Dol-P-Glc:Glc(2)Man(9)GlcNAc(2)-PP-Dol alpha-1,2-glucosyltransferase | 0                        | 0           | 1             |
| Ankh      | Q9JHZ2            | Progressive ankylosis protein                                                 | 1                        | 0           | 0             |
| Anks1a    | P59672            | Ankyrin repeat and SAM domain-containing protein 1A                           | 0                        | 0           | -1            |
| Anxa1     | P10107            | Annexin A1                                                                    | 0                        | 0           | -1            |
| Anxa2     | P07356            | Annexin A2                                                                    | 0                        | 1           | 0             |
| Anxa5     | P48036            | Annexin A5                                                                    | 0                        | 1           | 0             |
| Ap1s1     | P61967            | AP-1 complex subunit sigma-1A                                                 | 0                        | 0           | 1             |
| Ap4b1     | Q9WV76            | AP-4 complex subunit beta-1                                                   | 0                        | 1           | 0             |
| Apod      | P51910            | Apolipoprotein D                                                              | 0                        | 1           | 0             |
| Apoe      | P08226            | Apolipoprotein E                                                              | 1                        | 0           | 0             |
| Arhgap12  | Q8C0D4            | Rho GTPase-activating protein 12                                              | 0                        | -1          | 0             |
| Arhgap22  | Q8BL80            | Rho GTPase-activating protein 22                                              | 0                        | 0           | -1            |
| Arhgap30  | Q640N3            | Rho GTPase-activating protein 30                                              | 0                        | 0           | -1            |
| Arhgap31  | A6X8Z5            | Rho GTPase-activating protein 31                                              | 0                        | 0           | -1            |
| Arhgdib   | Q61599            | Rho GDP-dissociation inhibitor 2                                              | 0                        | 0           | -1            |
| Arl6ip4   | Q9JM93            | ADP-ribosylation factor-like protein 6-interacting protein 4                  | 0                        | -1          | 0             |
| Arrb2     | Q91YI4            | Beta-arrestin-2                                                               | 0                        | -1          | 0             |
| Arsa      | P50428            | Arylsulfatase A                                                               | 0                        | 0           | -1            |
| Arsg      | Q3TYD4            | Arylsulfatase G                                                               | 0                        | 0           | -1            |
| Asah1     | Q9WV54            | Acid ceramidase                                                               | 0                        | -1          | 0             |

| Gene Name | UniProt Accession | Protein Name                                                 | MARPs (up: +1; down: -1) |             |               |
|-----------|-------------------|--------------------------------------------------------------|--------------------------|-------------|---------------|
|           |                   |                                                              | Early MARP               | Middle MARP | Advanced MARP |
| Asph      | Q8BSY0            | Aspartyl/asparaginyl beta-hydroxylase                        | 0                        | 0           | 1             |
| Astn2     | Q80Z10            | Astrotactin-2                                                | 0                        | 0           | -1            |
| Atg2a     | Q6P4T0            | Autophagy-related protein 2 homolog A                        | 0                        | 0           | 1             |
| Atg7      | Q9D906            | Ubiquitin-like modifier-activating enzyme ATG7               | 0                        | 0           | 1             |
| Atp1b2    | P14231            | Sodium/potassium-transporting ATPase subunit beta-2          | 0                        | 0           | 1             |
| Atp1b3    | P97370            | Sodium/potassium-transporting ATPase subunit beta-3          | 0                        | 0           | 1             |
| Atp6v0a1  | Q9Z1G4            | V-type proton ATPase 116 kDa subunit a isoform 1             | 0                        | 0           | 1             |
| Atp6v1a   | P50516            | V-type proton ATPase catalytic subunit A                     | 0                        | 0           | 1             |
| Atp6v1b2  | P62814            | V-type proton ATPase subunit B, brain isoform                | 0                        | 0           | 1             |
| Atp6v1c1  | Q9Z1G3            | V-type proton ATPase subunit C 1                             | 0                        | 0           | 1             |
| Atp6v1d   | P57746            | V-type proton ATPase subunit D                               | 0                        | 0           | 1             |
| Atp6v1e1  | P50518            | V-type proton ATPase subunit E 1                             | 0                        | 0           | 1             |
| Atp6v1h   | Q8BVE3            | V-type proton ATPase subunit H                               | 0                        | 0           | 1             |
| Atp8a2    | P98200            | Phospholipid-transporting ATPase IB                          | 0                        | 0           | -1            |
| Atxn10    | P28658            | Ataxin-10                                                    | 0                        | 0           | 1             |
| B3galnt1  | Q920V1            | UDP-GalNAc:beta-1,3-N-acetylgalactosaminyltransferase 1      | 0                        | 0           | -1            |
| B4galt5   | Q9JMK0            | Beta-1,4-galactosyltransferase 5                             | 0                        | 0           | 1             |
| Baiap2    | Q8BKK1            | Brain-specific angiogenesis inhibitor 1-associated protein 2 | 0                        | 0           | 1             |
| Baz1b     | Q9Z277            | Tyrosine-protein kinase BAZ1B                                | 0                        | 0           | -1            |
| Bid       | P70444            | BH3-interacting domain death agonist                         | 0                        | 0           | -1            |
| Bin1      | O08539            | Myc box-dependent-interacting protein 1                      | 0                        | 0           | -1            |
| Bin2      | D3Z6Q9            | Bridging integrator 2                                        | 0                        | -1          | 0             |
| Blvrb     | Q923D2            | Flavin reductase (NADPH)                                     | 0                        | 0           | -1            |
| Bola2     | Q8BGS2            | BolA-like protein 2                                          | 1                        | 0           | 0             |
| Borcs5    | Q9D920            | BLOC-1-related complex subunit 5                             | 0                        | 0           | -1            |
| Borcs6    | Q9D6W8            | BLOC-1-related complex subunit 6                             | 0                        | 0           | -1            |
| Bri3bp    | Q8BXV2            | BRI3-binding protein                                         | 0                        | 0           | 1             |
| Brix1     | Q9DCA5            | Ribosome biogenesis protein BRX1 homolog                     | 0                        | 1           | 0             |
| Brk1      | Q91VR8            | Protein BRICK1                                               | 0                        | 0           | -1            |
| C5ar1     | P30993            | C5a anaphylatoxin chemotactic receptor 1                     | 0                        | 0           | -1            |



| Gene Name | UniProt Accession | Protein Name                                        | MARPs (up: +1; down: -1) |             |               |
|-----------|-------------------|-----------------------------------------------------|--------------------------|-------------|---------------|
|           |                   |                                                     | Early MARP               | Middle MARP | Advanced MARP |
| Calr      | P14211            | Calreticulin                                        | 0                        | 0           | 1             |
| Camp      | P51437            | Cathelicidin antimicrobial peptide                  | 0                        | 0           | -1            |
| Capg      | P24452            | Macrophage-capping protein                          | 1                        | 0           | 0             |
| Capn1     | O35350            | Calpain-1 catalytic subunit                         | 0                        | 1           | 0             |
| Casd1     | Q7TN73            | CAS1 domain-containing protein 1                    | 0                        | 0           | 1             |
| Cask      | O70589            | Peripheral plasma membrane protein CASK             | 0                        | 0           | -1            |
| Cbr2      | P08074            | Carbonyl reductase [NADPH] 2                        | 0                        | -1          | 0             |
| Cc2d1b    | Q8BRN9            | Coiled-coil and C2 domain-containing protein 1B     | 0                        | -1          | 0             |
| Ccdc124   | Q9D8X2            | Coiled-coil domain-containing protein 124           | 0                        | 0           | -1            |
| Ccdc30    | Q8BVF4            | Coiled-coil domain-containing protein 30            | 0                        | 0           | -1            |
| Ccdc50    | Q810U5            | Coiled-coil domain-containing protein 50            | 0                        | 0           | -1            |
| Ccdc88a   | Q5SNZ0            | Girdin                                              | 0                        | 0           | -1            |
| Ccm2      | Q8K2Y9            | Cerebral cavernous malformations protein 2 homolog  | 0                        | 0           | -1            |
| Ccnd1     | P25322            | G1/S-specific cyclin-D1                             | 0                        | 0           | -1            |
| Ccnk      | O88874            | Cyclin-K                                            | 0                        | 0           | 1             |
| Cd180     | Q62192            | CD180 antigen                                       | 1                        | 0           | 0             |
| Cd48      | P18181            | CD48 antigen                                        | 1                        | 0           | 0             |
| Cd63      | P41731            | CD63 antigen                                        | 0                        | 1           | 0             |
| Cd68      | P31996            | Macrosialin                                         | 1                        | 0           | 0             |
| Cd74      | P04441            | H-2 class II histocompatibility antigen gamma chain | 1                        | 0           | 0             |
| Cdc42bpb  | Q7TT50            | Serine/threonine-protein kinase MRCK beta           | 0                        | -1          | 0             |
| Cdk6      | Q64261            | Cyclin-dependent kinase 6                           | 1                        | 0           | 0             |
| Cdk7      | Q03147            | Cyclin-dependent kinase 7                           | 0                        | 1           | 0             |
| Cep170    | Q6A065            | Centrosomal protein of 170 kDa                      | 0                        | 0           | -1            |
| Cfl1      | P18760            | Cofilin-1                                           | 0                        | 0           | -1            |
| Chmp3     | Q9CQ10            | Charged multivesicular body protein 3               | 0                        | 0           | -1            |
| Chmp6     | P0C0A3            | Charged multivesicular body protein 6               | 0                        | 0           | -1            |
| Chst12    | Q99LL3            | Carbohydrate sulfotransferase 12                    | 0                        | 1           | 0             |
| Ckb       | Q04447            | Creatine kinase B-type                              | 0                        | 0           | -1            |
| Clec5a    | Q9R007            | C-type lectin domain family 5 member A              | 0                        | 0           | -1            |

| Gene Name | UniProt Accession | Protein Name                                               | MARPs (up: +1; down: -1) |             |               |
|-----------|-------------------|------------------------------------------------------------|--------------------------|-------------|---------------|
|           |                   |                                                            | Early MARP               | Middle MARP | Advanced MARP |
| Clec7a    | Q6QLQ4            | C-type lectin domain family 7 member A                     | 1                        | 0           | 0             |
| Cln3      | Q61124            | Battenin                                                   | 1                        | 0           | 0             |
| Clstn1    | Q9EPL2            | Calsyntenin-1                                              | 0                        | 0           | -1            |
| Cmklr1    | P97468            | Chemokine-like receptor 1                                  | 0                        | 0           | -1            |
| Cmtm7     | Q9ESD6            | CKLF-like MARVEL transmembrane domain-containing protein 7 | 0                        | -1          | 0             |
| Cnih4     | Q9CX13            | Protein cornichon homolog 4                                | 0                        | 0           | 1             |
| Cnn2      | Q08093            | Calponin-2                                                 | 0                        | -1          | 0             |
| Cnpy2     | Q9QXT0            | Protein canopy homolog 2                                   | 0                        | 0           | 1             |
| Cntnap1   | O54991            | Contactin-associated protein 1                             | 1                        | 0           | 0             |
| Cog2      | Q921L5            | Conserved oligomeric Golgi complex subunit 2               | 1                        | 0           | 0             |
| Cog5      | Q8C0L8            | Conserved oligomeric Golgi complex subunit 5               | 1                        | 0           | 0             |
| Cog7      | Q3UM29            | Conserved oligomeric Golgi complex subunit 7               | 0                        | 1           | 0             |
| Cog8      | Q9JJA2            | Conserved oligomeric Golgi complex subunit 8               | 0                        | 0           | 1             |
| Colgalt1  | Q8K297            | Procollagen galactosyltransferase 1                        | 1                        | 0           | 0             |
| Commd1    | Q8K4M5            | COMM domain-containing protein 1                           | 0                        | 0           | -1            |
| Commd10   | Q8JZY2            | COMM domain-containing protein 10                          | 0                        | 0           | -1            |
| Commd5    | Q8R395            | COMM domain-containing protein 5                           | 0                        | 0           | -1            |
| Commd8    | Q9CZG3            | COMM domain-containing protein 8                           | 0                        | 0           | -1            |
| Coro1b    | Q9WUM3            | Coronin-1B                                                 | 0                        | 0           | -1            |
| Cpq       | Q9WVJ3            | Carboxypeptidase Q                                         | 0                        | -1          | 0             |
| Cpsf31    | Q9CWS4            | Integrator complex subunit 11                              | 1                        | 0           | 0             |
| Crip1     | P63254            | Cysteine-rich protein 1                                    | 0                        | 1           | 0             |
| Crlf3     | Q9Z2L7            | Cytokine receptor-like factor 3                            | 0                        | 0           | -1            |
| Crybb1    | Q9WVJ5            | Beta-crystallin B1                                         | 0                        | 0           | -1            |
| Csad      | Q9DBE0            | Cysteine sulfinic acid decarboxylase                       | 0                        | 0           | -1            |
| Csf1r     | P09581            | Macrophage colony-stimulating factor 1 receptor            | 0                        | 0           | -1            |
| Csrp2     | P97314            | Cysteine and glycine-rich protein 2                        | 0                        | -1          | 0             |
| Cst3      | P21460            | Cystatin-C                                                 | 0                        | 0           | -1            |
| Cstb      | Q62426            | Cystatin-B                                                 | 0                        | 1           | 0             |
| Cstf3     | Q99LI7            | Cleavage stimulation factor subunit 3                      | 0                        | 0           | 1             |

| Gene Name | UniProt Accession | Protein Name                                                                  | MARPs (up: +1; down: -1) |             |               |
|-----------|-------------------|-------------------------------------------------------------------------------|--------------------------|-------------|---------------|
|           |                   |                                                                               | Early MARP               | Middle MARP | Advanced MARP |
| Ctbs      | Q8R242            | Di-N-acetylchitobiase                                                         | 0                        | -1          | 0             |
| Ctnnb1    | Q02248            | Catenin beta-1                                                                | 0                        | 0           | 1             |
| Ctsa      | P16675            | Lysosomal protective protein                                                  | 0                        | 0           | 1             |
| Ctsd      | P18242            | Cathepsin D                                                                   | 1                        | 0           | 0             |
| Ctsh      | P49935            | Pro-cathepsin H                                                               | 1                        | 0           | 0             |
| Ctsz      | Q9WUU7            | Cathepsin Z                                                                   | 1                        | 0           | 0             |
| Ctnbp2nl  | Q99LJ0            | CTTNBP2 N-terminal-like protein                                               | 0                        | 0           | -1            |
| Cutc      | Q9D8X1            | Copper homeostasis protein cutC homolog                                       | 0                        | 0           | 1             |
| Cux1      | P53564            | Homeobox protein cut-like 1                                                   | 0                        | 0           | 1             |
| Cx3cl1    | O35188            | Fractalkine                                                                   | 0                        | -1          | 0             |
| Cx3cr1    | Q9Z0D9            | CX3C chemokine receptor 1                                                     | 0                        | -1          | 0             |
| Cybb      | Q61093            | Cytochrome b-245 heavy chain                                                  | 0                        | 0           | 1             |
| Cyfip1    | Q7TMB8            | Cytoplasmic FMR1-interacting protein 1                                        | 0                        | 0           | -1            |
| Cyhr1     | Q9QXA1            | Cysteine and histidine-rich protein 1                                         | 0                        | 1           | 0             |
| Cyp20a1   | Q8BKE6            | Cytochrome P450 20A1                                                          | 0                        | 0           | 1             |
| Cyth4     | Q80YW0            | Cytohesin-4                                                                   | 0                        | 0           | -1            |
| Dalrd3    | Q6PJN8            | DALR anticodon-binding domain-containing protein 3                            | 0                        | 0           | -1            |
| Dapp1     | Q9QXT1            | Dual adapter for phosphotyrosine and 3-phosphotyrosine and 3-phosphoinositide | 0                        | -1          | 0             |
| Dcxr      | Q91X52            | L-xylulose reductase                                                          | 0                        | 0           | -1            |
| Ddb2      | Q99J79            | DNA damage-binding protein 2                                                  | 0                        | 1           | 0             |
| Ddx31     | Q6NZQ2            | Probable ATP-dependent RNA helicase DDX31                                     | 0                        | 1           | 0             |
| Ddx5      | Q61656            | Probable ATP-dependent RNA helicase DDX5                                      | 0                        | 0           | -1            |
| Dennd1c   | Q8CFK6            | DENN domain-containing protein 1C                                             | 0                        | 0           | -1            |
| Dffa      | O54786            | DNA fragmentation factor subunit alpha                                        | 0                        | 0           | -1            |
| Dhcr7     | O88455            | 7-dehydrocholesterol reductase                                                | 0                        | 1           | 0             |
| Dhrs3     | O88876            | Short-chain dehydrogenase/reductase 3                                         | 1                        | 0           | 0             |
| Dhx32     | Q8BZS9            | Putative pre-mRNA-splicing factor ATP-dependent RNA helicase DHX32            | 1                        | 0           | 0             |
| Dhx58     | Q99J87            | Probable ATP-dependent RNA helicase DHX58                                     | 1                        | 0           | 0             |
| Dip2b     | Q3UH60            | Disco-interacting protein 2 homolog B                                         | 0                        | 0           | -1            |
| Dkc1      | Q9ESX5            | H/ACA ribonucleoprotein complex subunit 4                                     | 1                        | 0           | 0             |

| Gene Name | UniProtAccession | Protein Name                                                                      | MARPs (up: +1; down: -1) |             |               |
|-----------|------------------|-----------------------------------------------------------------------------------|--------------------------|-------------|---------------|
|           |                  |                                                                                   | EarlyMARP                | MiddleMA RP | Advanced MARP |
| Dnaja2    | Q9QYJ0           | DnaJ homolog subfamily A member 2                                                 | 0                        | 0           | -1            |
| Dnajb14   | Q149L6           | DnaJ homolog subfamily B member 14                                                | 1                        | 0           | 0             |
| Dock10    | Q8BZN6           | Dedicator of cytokinesis protein 10                                               | 0                        | 0           | -1            |
| Dock4     | P59764           | Dedicator of cytokinesis protein 4                                                | 0                        | 0           | -1            |
| Dok1      | P97465           | Docking protein 1                                                                 | 0                        | 0           | -1            |
| Dok3      | Q9QZK7           | Docking protein 3                                                                 | 0                        | 0           | -1            |
| Dpagt1    | P42867           | UDP-N-acetylglucosamine--dolichyl-phosphate N-acetylglucosaminephosphotransferase | 0                        | 0           | 1             |
| Dpy1914   | A2AJQ3           | Probable C-mannosyltransferase DPY19L4                                            | 0                        | 0           | 1             |
| Dusp3     | Q9D7X3           | Dual specificity protein phosphatase 3                                            | 0                        | 0           | 1             |
| Dynlt3    | P56387           | Dynein light chain Tctex-type 3                                                   | 0                        | 0           | 1             |
| Echs1     | Q8BH95           | Enoyl-CoA hydratase, mitochondrial                                                | 0                        | 0           | 1             |
| Eef2k     | O08796           | Eukaryotic elongation factor 2 kinase                                             | 0                        | 0           | -1            |
| Ehd2      | Q8BH64           | EH domain-containing protein 2                                                    | -1                       | 0           | 0             |
| Eif4b     | Q8BGD9           | Eukaryotic translation initiation factor 4B                                       | 0                        | 0           | -1            |
| Elmo2     | Q8BHL5           | Engulfment and cell motility protein 2                                            | 0                        | 1           | 0             |
| Elov11    | Q9JLJ5           | Elongation of very long chain fatty acids protein 1                               | 0                        | 0           | 1             |
| Eml2      | Q7TNG5           | Echinoderm microtubule-associated protein-like 2                                  | 0                        | 0           | 1             |
| Eno1      | P17182           | Alpha-enolase                                                                     | 0                        | 0           | 1             |
| Enpp1     | P06802           | Ectonucleotide pyrophosphatase/phosphodiesterase family member 1                  | 0                        | 1           | 0             |
| Enpp4     | Q8BTJ4           | Bis(5'-adenosyl)-triphosphatase enpp4                                             | 0                        | -1          | 0             |
| Entpd1    | P55772           | Ectonucleoside triphosphate diphosphohydrolase 1                                  | 0                        | 0           | -1            |
| Epb4112   | O70318           | Band 4.1-like protein 2                                                           | 0                        | 0           | -1            |
| Epdr1     | Q99M71           | Mammalian ependymin-related protein 1                                             | 0                        | 0           | -1            |
| Epha2     | Q03145           | Ephrin type-A receptor 2                                                          | 0                        | 0           | -1            |
| Ephx1     | Q9D379           | Epoxide hydrolase 1                                                               | 0                        | 1           | 0             |
| Epn1      | Q80VP1           | Epsin-1                                                                           | 0                        | 0           | -1            |
| Ergic2    | Q9CR89           | Endoplasmic reticulum-Golgi intermediate compartment protein 2                    | 0                        | 0           | 1             |
| Erlec1    | Q8VEH8           | Endoplasmic reticulum lectin 1                                                    | 0                        | 0           | 1             |
| Ero1a     | Q8R180           | ERO1-like protein alpha                                                           | 0                        | 0           | 1             |
| Erp29     | P57759           | Endoplasmic reticulum resident protein 29                                         | 0                        | 1           | 0             |

| Gene Name | UniProt Accession | Protein Name                                    | MARPs (up: +1; down: -1) |             |               |
|-----------|-------------------|-------------------------------------------------|--------------------------|-------------|---------------|
|           |                   |                                                 | Early MARP               | Middle MARP | Advanced MARP |
| Erp44     | Q9D1Q6            | Endoplasmic reticulum resident protein 44       | 0                        | 0           | 1             |
| Evi5      | P97366            | Ecotropic viral integration site 5 protein      | 0                        | 0           | -1            |
| Exoc1     | Q8R3S6            | Exocyst complex component 1                     | 0                        | 0           | -1            |
| F11r      | O88792            | Junctional adhesion molecule A                  | 0                        | 0           | -1            |
| F13a1     | Q8BH61            | Coagulation factor XIII A chain                 | 0                        | -1          | 0             |
| Fabp3     | P11404            | Fatty acid-binding protein, heart               | 0                        | 1           | 0             |
| Fabp5     | Q05816            | Fatty acid-binding protein, epidermal           | 0                        | 1           | 0             |
| Fam160b1  | Q8CDM8            | Protein FAM160B1                                | 0                        | 0           | 1             |
| Fam213b   | Q9DB60            | Prostamide/prostaglandin F synthase             | 0                        | 0           | -1            |
| Fam3c     | Q91VU0            | Protein FAM3C                                   | 0                        | 0           | 1             |
| Fam45a    | Q9D8N2            | Protein FAM45A                                  | 0                        | 0           | -1            |
| Fam49b    | Q921M7            | Protein FAM49B                                  | 0                        | 0           | -1            |
| Fasn      | P19096            | Fatty acid synthase                             | 0                        | 0           | 1             |
| Fbx114    | Q8BID8            | F-box/LRR-repeat protein 14                     | 0                        | 1           | 0             |
| Fchsd2    | Q3USJ8            | F-BAR and double SH3 domains protein 2          | 0                        | 0           | -1            |
| Fdps      | Q920E5            | Farnesyl pyrophosphate synthase                 | 0                        | 1           | 0             |
| Fer       | P70451            | Tyrosine-protein kinase Fer                     | 0                        | -1          | 0             |
| Fez2      | Q6TYB5            | Fasciculation and elongation protein zeta-2     | 0                        | 0           | -1            |
| Fgd2      | Q8BY35            | FYVE, RhoGEF and PH domain-containing protein 2 | 0                        | 0           | -1            |
| Fgf1      | P61148            | Fibroblast growth factor 1                      | 0                        | 0           | 1             |
| Fgf2      | P15655            | Fibroblast growth factor 2                      | 0                        | 1           | 0             |
| Fhit      | O89106            | Bis(5'-adenosyl)-triphosphatase                 | 0                        | -1          | 0             |
| Filip11   | Q6P6L0            | Filamin A-interacting protein 1-like            | 0                        | 0           | -1            |
| Fkbp2     | P45878            | Peptidyl-prolyl cis-trans isomerase FKBP2       | 0                        | 1           | 0             |
| Fmnl1     | Q9JL26            | Formin-like protein 1                           | 0                        | 0           | -1            |
| Fmnl2     | A2APV2            | Formin-like protein 2                           | 0                        | -1          | 0             |
| Fmnl3     | Q6ZPF4            | Formin-like protein 3                           | 0                        | -1          | 0             |
| Fnbp1     | Q80TY0            | Formin-binding protein 1                        | 0                        | 0           | -1            |
| Frm4a     | Q8BIE6            | FERM domain-containing protein 4A               | 0                        | 0           | -1            |
| Fry       | E9Q8I9            | Protein furry homolog                           | 0                        | 0           | 1             |



| Gene Name | UniProt Accession | Protein Name                                                       | MARPs (up: +1; down: -1) |             |               |
|-----------|-------------------|--------------------------------------------------------------------|--------------------------|-------------|---------------|
|           |                   |                                                                    | Early MARP               | Middle MARP | Advanced MARP |
| Fscn1     | Q61553            | Fascin                                                             | 0                        | -1          | 0             |
| Fth1      | P09528            | Ferritin heavy chain                                               | 0                        | 0           | 1             |
| Fuom      | Q8R2K1            | Fucose mutarotase                                                  | 1                        | 0           | 0             |
| Fxyd1     | Q9Z239            | Phospholemman                                                      | 0                        | 0           | 1             |
| Fyn       | P39688            | Tyrosine-protein kinase Fyn                                        | 0                        | 0           | 1             |
| Gab1      | Q9QYY0            | GRB2-associated-binding protein 1                                  | 0                        | -1          | 0             |
| Gab2      | Q9Z1S8            | GRB2-associated-binding protein 2                                  | 0                        | 0           | -1            |
| Galnt1    | O08912            | Polypeptide N-acetylgalactosaminyltransferase 1                    | 0                        | 0           | 1             |
| Galnt2    | Q6PB93            | Polypeptide N-acetylgalactosaminyltransferase 2                    | 0                        | 0           | 1             |
| Gatm      | Q9D964            | Glycine amidinotransferase, mitochondrial                          | 0                        | 0           | -1            |
| Gca       | Q8VC88            | Grancalcin                                                         | 0                        | 0           | 1             |
| Gcat      | O88986            | 2-amino-3-ketobutyrate coenzyme A ligase, mitochondrial            | 0                        | 0           | 1             |
| Gcc2      | Q8CHG3            | GRIP and coiled-coil domain-containing protein 2                   | 0                        | 0           | 1             |
| Gde1      | Q9JL56            | Glycerophosphodiester phosphodiesterase 1                          | 0                        | 0           | 1             |
| Get4      | Q9D1H7            | Golgi to ER traffic protein 4 homolog                              | 0                        | 0           | 1             |
| Gfap      | P03995            | Glial fibrillary acidic protein                                    | 0                        | 0           | 1             |
| Gfpt1     | P47856            | Glutamine--fructose-6-phosphate aminotransferase [isomerizing] 1   | 0                        | 1           | 0             |
| Gja1      | P23242            | Gap junction alpha-1 protein                                       | 0                        | 0           | 1             |
| Glb1      | P23780            | Beta-galactosidase                                                 | 1                        | 0           | 0             |
| Glg1      | Q61543            | Golgi apparatus protein 1                                          | 0                        | 0           | 1             |
| Glmn      | Q8BZM1            | Glomulin                                                           | 0                        | 0           | 1             |
| Gmip      | Q6PGG2            | GEM-interacting protein                                            | 0                        | 0           | -1            |
| Gna12     | P27600            | Guanine nucleotide-binding protein subunit alpha-12                | 0                        | -1          | 0             |
| Gna15     | P30678            | Guanine nucleotide-binding protein subunit alpha-15                | 0                        | 0           | -1            |
| Gnai1     | B2RSH2            | Guanine nucleotide-binding protein G(i) subunit alpha-1            | 0                        | 0           | -1            |
| Gnai2     | P08752            | Guanine nucleotide-binding protein G(i) subunit alpha-2            | 0                        | 0           | -1            |
| Gnb1      | P62874            | Guanine nucleotide-binding protein G(I)/G(S)/G(T) subunit beta-1   | 0                        | 0           | -1            |
| Gnb2      | P62880            | Guanine nucleotide-binding protein G(I)/G(S)/G(T) subunit beta-2   | 0                        | 0           | -1            |
| Gng10     | Q9CXP8            | Guanine nucleotide-binding protein G(I)/G(S)/G(O) subunit gamma-10 | 0                        | 0           | -1            |
| Gng2      | P63213            | Guanine nucleotide-binding protein G(I)/G(S)/G(O) subunit gamma-2  | 0                        | 0           | -1            |

| Gene Name | UniProt Accession | Protein Name                                                       | MARPs (up: +1; down: -1) |             |               |
|-----------|-------------------|--------------------------------------------------------------------|--------------------------|-------------|---------------|
|           |                   |                                                                    | Early MARP               | Middle MARP | Advanced MARP |
| Gng5      | Q80SZ7            | Guanine nucleotide-binding protein G(I)/G(S)/G(O) subunit gamma-5  | 0                        | 0           | -1            |
| Gngt2     | Q61017            | Guanine nucleotide-binding protein G(I)/G(S)/G(O) subunit gamma-T2 | 0                        | 0           | -1            |
| Gns       | Q8BFR4            | N-acetylglucosamine-6-sulfatase                                    | 0                        | 0           | 1             |
| Golga3    | P55937            | Golgin subfamily A member 3                                        | 0                        | 0           | 1             |
| Golga4    | Q91VW5            | Golgin subfamily A member 4                                        | 0                        | 1           | 0             |
| Golga5    | Q9QYE6            | Golgin subfamily A member 5                                        | 0                        | 0           | 1             |
| Golt1b    | Q9CR60            | Vesicle transport protein GOT1B                                    | 0                        | 0           | 1             |
| Got1      | P05201            | Aspartate aminotransferase, cytoplasmic                            | 0                        | 0           | 1             |
| Gpd1      | P13707            | Glycerol-3-phosphate dehydrogenase [NAD(+)], cytoplasmic           | -1                       | 0           | 0             |
| Gpi       | P06745            | Glucose-6-phosphate isomerase                                      | 0                        | 0           | 1             |
| Gpld1     | O70362            | Phosphatidylinositol-glycan-specific phospholipase D               | 0                        | -1          | 0             |
| Gpm6a     | P35802            | Neuronal membrane glycoprotein M6-a                                | 0                        | 0           | 1             |
| Gpr84     | Q8CIM5            | G-protein coupled receptor 84                                      | 1                        | 0           | 0             |
| Grap      | Q9CX99            | GRB2-related adapter protein                                       | 0                        | 0           | -1            |
| Gsdmde1   | Q9D8T2            | Gasdermin-D                                                        | 0                        | 0           | -1            |
| Gsn       | P13020            | Gelsolin                                                           | 0                        | 1           | 0             |
| Gtf3c4    | Q8BMQ2            | General transcription factor 3C polypeptide 4                      | 1                        | 0           | 0             |
| Gusb      | P12265            | Beta-glucuronidase                                                 | 0                        | 1           | 0             |
| Gvin1     | Q80SU7            | Interferon-induced very large GTPase 1                             | 1                        | 0           | 0             |
| Gyg1      | Q9R062            | Glycogenin-1                                                       | 0                        | 0           | 1             |
| Gys1      | Q9Z1E4            | Glycogen [starch] synthase, muscle                                 | 0                        | 0           | 1             |
| H2afz     | P0C0S6            | Histone H2A.Z;Histone H2A.V                                        | 0                        | -1          | 0             |
| H2-D1     | P01899            | H-2 class I histocompatibility antigen, D-B alpha chain            | 1                        | 0           | 0             |
| H2-K1     | P01901            | H-2 class I histocompatibility antigen, K-B alpha chain            | 1                        | 0           | 0             |
| H2-T23    | P06339            | H-2 class I histocompatibility antigen, D-37 alpha chain           | 0                        | 1           | 0             |
| H3f3c     | P02301            | Histone H3.3C;Histone H3.3                                         | 0                        | 0           | -1            |
| Hao       | Q78JT3            | 3-hydroxyanthranilate 3,4-dioxygenase                              | 1                        | 0           | 0             |
| Hacd2     | Q9D3B1            | Very-long-chain (3R)-3-hydroxyacyl-CoA dehydratase 2               | 0                        | 1           | 0             |
| Hapln1    | Q9QUP5            | Hyaluronan and proteoglycan link protein 1                         | 0                        | 1           | 0             |
| Hck       | P08103            | Tyrosine-protein kinase HCK                                        | 0                        | 0           | -1            |

| Gene Name | UniProt Accession | Protein Name                                                | MARPs (up: +1; down: -1) |             |               |
|-----------|-------------------|-------------------------------------------------------------|--------------------------|-------------|---------------|
|           |                   |                                                             | Early MARP               | Middle MARP | Advanced MARP |
| Hepacam   | Q640R3            | Hepatocyte cell adhesion molecule                           | 0                        | 0           | 1             |
| Hexa      | P29416            | Beta-hexosaminidase subunit alpha                           | 1                        | 0           | 0             |
| Hexb      | P20060            | Beta-hexosaminidase subunit beta                            | 0                        | 0           | 1             |
| Hic2      | Q9JLZ6            | Hypermethylated in cancer 2 protein                         | 0                        | 0           | -1            |
| Hist1h1a  | P43275            | Histone H1.1                                                | 0                        | 1           | 0             |
| Hist1h1b  | P43276            | Histone H1.5                                                | 0                        | 1           | 0             |
| Hist1h2ab | P22752            | Histone H2A type 1                                          | 0                        | 0           | -1            |
| Hist1h2bf | P10853            | Histone H2B type 1-F/J/L                                    | 0                        | 0           | -1            |
| Hist2h2ac | Q64523            | Histone H2A type 2-C                                        | 0                        | -1          | 0             |
| Hmga1     | P17095            | High mobility group protein HMG-I/HMG-Y                     | 0                        | -1          | 0             |
| Hmgn2     | P09602            | Non-histone chromosomal protein HMG-17                      | 0                        | -1          | 0             |
| Hmha1     | Q3TBD2            | Minor histocompatibility protein HA-1                       | 0                        | 0           | -1            |
| Hmox1     | P14901            | Heme oxygenase 1                                            | 0                        | 1           | 0             |
| Hpca      | P84075            | Neuron-specific calcium-binding protein hippocalcin         | 0                        | 0           | 1             |
| Hpcal1    | P62748            | Hippocalcin-like protein 1                                  | 0                        | 0           | 1             |
| Hpcal4    | Q8BGZ1            | Hippocalcin-like protein 4                                  | 0                        | 0           | 1             |
| Hpf1      | Q8CFE2            | Histone PARylation factor 1                                 | 0                        | 0           | 1             |
| Hpgd      | Q8VCC1            | 15-hydroxyprostaglandin dehydrogenase [NAD(+)]              | 0                        | 0           | -1            |
| Hpgds     | Q9JHF7            | Hematopoietic prostaglandin D synthase                      | 0                        | 0           | -1            |
| Hras      | Q61411            | GTPase HRas                                                 | 0                        | 0           | -1            |
| Hsd17b12  | O70503            | Very-long-chain 3-oxoacyl-CoA reductase                     | 0                        | 1           | 0             |
| Hspa5     | P20029            | 78 kDa glucose-regulated protein                            | 0                        | 0           | 1             |
| Htra1     | Q9R118            | Serine protease HTRA1                                       | 1                        | 0           | 0             |
| Hyal1     | Q91ZJ9            | Hyaluronidase-1                                             | 0                        | 0           | -1            |
| Idh2      | P54071            | Isocitrate dehydrogenase [NADP], mitochondrial              | 0                        | -1          | 0             |
| Ier3ip1   | Q9CR20            | Immediate early response 3-interacting protein 1            | 0                        | 0           | 1             |
| Ifi204    | P0DOV2            | Interferon-activable protein 204                            | 1                        | 0           | 0             |
| Ifit2     | Q64112            | Interferon-induced protein with tetratricopeptide repeats 2 | 1                        | 0           | 0             |
| Ifit3     | Q64345            | Interferon-induced protein with tetratricopeptide repeats 3 | 1                        | 0           | 0             |
| Ifitm3    | Q9CQW9            | Interferon-induced transmembrane protein 3                  | 0                        | 1           | 0             |

| Gene Name | UniProt Accession | Protein Name                                    | MARPs (up: +1; down: -1) |             |               |
|-----------|-------------------|-------------------------------------------------|--------------------------|-------------|---------------|
|           |                   |                                                 | Early MARP               | Middle MARP | Advanced MARP |
| Igfbp7    | Q61581            | Insulin-like growth factor-binding protein 7    | 0                        | -1          | 0             |
| Il16      | O54824            | Pro-interleukin-16                              | 0                        | 0           | -1            |
| Il6st     | Q00560            | Interleukin-6 receptor subunit beta             | 0                        | 0           | -1            |
| Ilf2      | Q9CXY6            | Interleukin enhancer-binding factor 2           | 0                        | 0           | 1             |
| Inf2      | Q0GNC1            | Inverted formin-2                               | 0                        | 0           | 1             |
| Inpp4b    | Q6P1Y8            | Type II inositol 3,4-bisphosphate 4-phosphatase | 0                        | 0           | -1            |
| Ints1     | Q6P4S8            | Integrator complex subunit 1                    | 0                        | 0           | 1             |
| Ints2     | Q80UK8            | Integrator complex subunit 2                    | 1                        | 0           | 0             |
| Ints3     | Q7TPD0            | Integrator complex subunit 3                    | 0                        | 0           | 1             |
| Ints5     | Q8CHT3            | Integrator complex subunit 5                    | 0                        | 0           | 1             |
| Ints7     | Q7TQK1            | Integrator complex subunit 7                    | 0                        | 0           | 1             |
| Ipo4      | Q8VI75            | Importin-4                                      | 0                        | 1           | 0             |
| Irak1     | Q62406            | Interleukin-1 receptor-associated kinase 1      | 0                        | 0           | -1            |
| Isg15     | Q64339            | Ubiquitin-like protein ISG15                    | 1                        | 0           | 0             |
| Ist1      | Q9CX00            | IST1 homolog                                    | 0                        | 1           | 0             |
| Itga9     | B8JK39            | Integrin alpha-9                                | 0                        | -1          | 0             |
| Itgav     | P43406            | Integrin alpha-V                                | 0                        | 0           | -1            |
| Itgax     | Q9QXH4            | Integrin alpha-X                                | 1                        | 0           | 0             |
| Itgb6     | Q9Z0T9            | Integrin beta-6                                 | 0                        | 0           | -1            |
| Itpr2     | Q9Z329            | Inositol 1,4,5-trisphosphate receptor type 2    | 0                        | -1          | 0             |
| Itpr3     | P70227            | Inositol 1,4,5-trisphosphate receptor type 3    | 0                        | -1          | 0             |
| Ivns1abp  | Q920Q8            | Influenza virus NS1A-binding protein homolog    | 0                        | 0           | -1            |
| Jak1      | P52332            | Tyrosine-protein kinase JAK1                    | 0                        | 0           | -1            |
| Kif1a     | P33173            | Kinesin-like protein KIF1A                      | 0                        | 0           | 1             |
| Kras      | P32883            | GTPase KRas                                     | -1                       | 0           | 0             |
| Krtcap2   | Q5RL79            | Keratinocyte-associated protein 2               | 0                        | 0           | 1             |
| Ldhb      | P16125            | L-lactate dehydrogenase B chain                 | 0                        | 0           | -1            |
| Lgals3    | P16110            | Galectin-3                                      | 1                        | 0           | 0             |
| Lgals3bp  | Q07797            | Galectin-3-binding protein                      | 1                        | 0           | 0             |
| Lgals9    | O08573            | Galectin-9                                      | 0                        | 0           | -1            |

| Gene Name | UniProt Accession | Protein Name                                            | MARPs (up: +1; down: -1) |             |               |
|-----------|-------------------|---------------------------------------------------------|--------------------------|-------------|---------------|
|           |                   |                                                         | Early MARP               | Middle MARP | Advanced MARP |
| Limd2     | Q8BGB5            | LIM domain-containing protein 2                         | 0                        | 0           | -1            |
| Llg1l     | Q80Y17            | Lethal(2) giant larvae protein homolog 1                | -1                       | 0           | 0             |
| Lman1     | Q9D0F3            | Protein ERGIC-53                                        | 0                        | 1           | 0             |
| Lman2     | Q9DBH5            | Vesicular integral-membrane protein VIP36               | 0                        | 0           | 1             |
| Lmna      | P48678            | Prelamin-A/C                                            | 0                        | 0           | 1             |
| Lmnb2     | P21619            | Lamin-B2                                                | 0                        | 0           | 1             |
| Lpcat2    | Q8BYI6            | Lysophosphatidylcholine acyltransferase 2               | 0                        | 0           | -1            |
| Lrp1      | Q91ZX7            | Prolow-density lipoprotein receptor-related protein 1   | 0                        | 0           | -1            |
| Lrpap1    | P55302            | Alpha-2-macroglobulin receptor-associated protein       | 0                        | 1           | 0             |
| Lrrc20    | Q8CI70            | Leucine-rich repeat-containing protein 20               | 0                        | 0           | 1             |
| Lrrc25    | Q8K1T1            | Leucine-rich repeat-containing protein 25               | 0                        | -1          | 0             |
| Lrrc8d    | Q8BGR2            | Volume-regulated anion channel subunit LRRC8D           | 0                        | 0           | 1             |
| Ltc4s     | Q60860            | Leukotriene C4 synthase                                 | 0                        | 0           | -1            |
| Luc7l3    | Q5SUF2            | Luc7-like protein 3                                     | -1                       | 0           | 0             |
| Ly86      | O88188            | Lymphocyte antigen 86                                   | 1                        | 0           | 0             |
| Lyn       | P25911            | Tyrosine-protein kinase Lyn                             | 0                        | 0           | -1            |
| Lyplal1   | Q3UFF7            | Lysophospholipase-like protein 1                        | 0                        | 0           | 1             |
| Lyz2      | P08905            | Lysozyme C-2                                            | 0                        | 0           | 1             |
| Magt1     | Q9CQY5            | Magnesium transporter protein 1                         | 0                        | 0           | 1             |
| Manf      | Q9CXI5            | Mesencephalic astrocyte-derived neurotrophic factor     | 0                        | 0           | 1             |
| Map1s     | Q8C052            | Microtubule-associated protein 1S                       | 0                        | 0           | -1            |
| Map3k3    | Q61084            | Mitogen-activated protein kinase kinase kinase 3        | 0                        | 0           | -1            |
| Map4      | P27546            | Microtubule-associated protein 4                        | 0                        | 0           | -1            |
| Map4k4    | P97820            | Mitogen-activated protein kinase kinase kinase kinase 4 | 0                        | -1          | 0             |
| Map7d1    | A2AJI0            | MAP7 domain-containing protein 1                        | 0                        | -1          | 0             |
| Mapre1    | Q61166            | Microtubule-associated protein RP/EB family member 1    | 0                        | 0           | -1            |
| Marcks    | P26645            | Myristoylated alanine-rich C-kinase substrate           | 0                        | 0           | -1            |
| Marcksl1  | P28667            | MARCKS-related protein                                  | 0                        | 0           | -1            |
| Mcm2      | P97310            | DNA replication licensing factor MCM2                   | 0                        | 1           | 0             |
| Mcm3      | P25206            | DNA replication licensing factor MCM3                   | 0                        | 1           | 0             |



| Gene Name | UniProt Accession | Protein Name                                                           | MARPs (up: +1; down: -1) |             |               |
|-----------|-------------------|------------------------------------------------------------------------|--------------------------|-------------|---------------|
|           |                   |                                                                        | Early MARP               | Middle MARP | Advanced MARP |
| Mcm5      | P49718            | DNA replication licensing factor MCM5                                  | 1                        | 0           | 0             |
| Med15     | Q924H2            | Mediator of RNA polymerase II transcription subunit 15                 | 0                        | 0           | 1             |
| Mgat2     | Q921V5            | Alpha-1,6-mannosyl-glycoprotein 2-beta-N-acetylglucosaminyltransferase | 0                        | 0           | 1             |
| Mgst3     | Q9CPU4            | Microsomal glutathione S-transferase 3                                 | 0                        | 0           | 1             |
| Mif       | P34884            | Macrophage migration inhibitory factor                                 | 0                        | 1           | 0             |
| Milr1     | Q3TB92            | Allergin-1                                                             | 1                        | 0           | 0             |
| Mnda      | P0DOV1            | Interferon-activable protein 205-B                                     | 1                        | 0           | 0             |
| Mospd2    | Q9CWP6            | Motile sperm domain-containing protein 2                               | 0                        | 1           | 0             |
| Mov10     | P23249            | Putative helicase MOV-10                                               | 1                        | 0           | 0             |
| Mpeg1     | A1L314            | Macrophage-expressed gene 1 protein                                    | 1                        | 0           | 0             |
| Mpi       | Q924M7            | Mannose-6-phosphate isomerase                                          | 0                        | 0           | -1            |
| Mras      | O08989            | Ras-related protein M-Ras                                              | 0                        | 0           | -1            |
| Mrc1      | Q61830            | Macrophage mannose receptor 1                                          | 0                        | -1          | 0             |
| Mrpl40    | Q9Z2Q5            | 39S ribosomal protein L40, mitochondrial                               | 0                        | 0           | 1             |
| Msmo1     | Q9CRA4            | Methylsterol monooxygenase 1                                           | 0                        | 0           | 1             |
| Mthfs     | Q9D110            | 5-formyltetrahydrofolate cyclo-ligase                                  | 0                        | 0           | 1             |
| Mto1      | Q923Z3            | Protein MTO1 homolog, mitochondrial                                    | 0                        | 0           | 1             |
| Mtr       | A6H5Y3            | Methionine synthase                                                    | 0                        | 0           | -1            |
| Mvb12b    | Q6KAU4            | Multivesicular body subunit 12B                                        | 0                        | 0           | -1            |
| Myo1b     | P46735            | Unconventional myosin-Ib                                               | 0                        | 0           | -1            |
| Myo1g     | Q5SUA5            | Unconventional myosin-Ig                                               | 0                        | 0           | -1            |
| Myo5a     | Q99104            | Unconventional myosin-Va                                               | 0                        | 0           | 1             |
| Myo9a     | Q8C170            | Unconventional myosin-IXa                                              | 0                        | 0           | -1            |
| Naa25     | Q8BWZ3            | N-alpha-acetyltransferase 25, NatB auxiliary subunit                   | 0                        | 0           | 1             |
| Naaa      | Q9D7V9            | N-acylethanolamine-hydrolyzing acid amidase                            | 0                        | -1          | 0             |
| Nampt     | Q99KQ4            | Nicotinamide phosphoribosyltransferase                                 | 0                        | 1           | 0             |
| Ncan      | P55066            | Neurocan core protein                                                  | 0                        | 0           | 1             |
| Nceh1     | Q8BLF1            | Neutral cholesterol ester hydrolase 1                                  | 0                        | 1           | 0             |
| Ncl       | P09405            | Nucleolin                                                              | 0                        | 0           | 1             |
| Ndrp2     | Q9QYG0            | Protein NDRG2                                                          | 0                        | 0           | 1             |

| Gene Name | UniProt Accession | Protein Name                                                           | MARPs (up: +1; down: -1) |             |               |
|-----------|-------------------|------------------------------------------------------------------------|--------------------------|-------------|---------------|
|           |                   |                                                                        | Early MARP               | Middle MARP | Advanced MARP |
| Nenf      | Q9CQ45            | Neudesin                                                               | 0                        | 0           | 1             |
| Neu4      | Q8BZL1            | Sialidase-4                                                            | 0                        | 0           | -1            |
| Nfatc1    | O88942            | Nuclear factor of activated T-cells, cytoplasmic 1                     | 0                        | 0           | -1            |
| Nfatc2    | Q60591            | Nuclear factor of activated T-cells, cytoplasmic 2                     | 0                        | 0           | -1            |
| Nfkbib    | Q60778            | NF-kappa-B inhibitor beta                                              | 0                        | 0           | -1            |
| Ngp       | O08692            | Neutrophilic granule protein                                           | 0                        | 0           | -1            |
| Nipsnap3b | Q9CQE1            | Protein NipSnap homolog 3B                                             | 0                        | 0           | 1             |
| Nit1      | Q8VDK1            | Nitrilase homolog 1                                                    | 0                        | 0           | -1            |
| Nkiras2   | Q9CR56            | NF-kappa-B inhibitor-interacting Ras-like protein 2                    | 0                        | 0           | 1             |
| No66      | Q9JJF3            | Bifunctional lysine-specific demethylase and histidyl-hydroxylase NO66 | 0                        | 0           | 1             |
| Nop10     | Q9CQS2            | H/ACA ribonucleoprotein complex subunit 3                              | 1                        | 0           | 0             |
| Npc2      | Q9Z0J0            | Epididymal secretory protein E1                                        | 1                        | 0           | 0             |
| Nras      | P08556            | GTPase NRas                                                            | 0                        | 0           | -1            |
| Nrbf2     | Q8VCQ3            | Nuclear receptor-binding factor 2                                      | 1                        | 0           | 0             |
| Nsdhl     | Q9R1J0            | Sterol-4-alpha-carboxylate 3-dehydrogenase, decarboxylating            | 0                        | 0           | 1             |
| Nucb1     | Q02819            | Nucleobindin-1                                                         | 0                        | 0           | 1             |
| Nucb2     | P81117            | Nucleobindin-2                                                         | 1                        | 0           | 0             |
| Numb      | Q9QZS3            | Protein numb homolog                                                   | 0                        | -1          | 0             |
| Numbl     | O08919            | Numb-like protein                                                      | 0                        | -1          | 0             |
| Nup155    | Q99P88            | Nuclear pore complex protein Nup155                                    | 0                        | 0           | 1             |
| Oas1a     | P11928            | 2'-5'-oligoadenylate synthase 1A                                       | 1                        | 0           | 0             |
| Olfml3    | Q8BK62            | Olfactomedin-like protein 3                                            | 0                        | 0           | -1            |
| Omg       | Q63912            | Oligodendrocyte-myelin glycoprotein                                    | -1                       | 0           | 0             |
| Ophn1     | Q99J31            | Oligophrenin-1                                                         | 0                        | 0           | -1            |
| ORF11     | Q9ERY9            | Probable ergosterol biosynthetic protein 28                            | 0                        | 0           | 1             |
| Os9       | Q8K2C7            | Protein OS-9                                                           | 0                        | 1           | 0             |
| Osbpl3    | Q9DBS9            | Oxysterol-binding protein-related protein 3                            | 0                        | 0           | 1             |
| Osbpl8    | B9EJ86            | Oxysterol-binding protein-related protein 8                            | 0                        | 0           | 1             |
| P2rx4     | Q9JJX6            | P2X purinoceptor 4                                                     | 0                        | 0           | 1             |
| P2rx7     | Q9Z1M0            | P2X purinoceptor 7                                                     | 0                        | 0           | -1            |

| Gene Name | UniProt Accession | Protein Name                                                      | MARPs (up: +1; down: -1) |             |               |
|-----------|-------------------|-------------------------------------------------------------------|--------------------------|-------------|---------------|
|           |                   |                                                                   | Early MARP               | Middle MARP | Advanced MARP |
| P2ry12    | Q9CPV9            | P2Y purinoceptor 12                                               | 0                        | -1          | 0             |
| P2yr13    | Q9D8I2            | P2Y purinoceptor 13                                               | 0                        | 0           | -1            |
| Pacsin1   | Q61644            | Protein kinase C and casein kinase substrate in neurons protein 1 | 0                        | 0           | 1             |
| Pacsin2   | Q9WVE8            | Protein kinase C and casein kinase substrate in neurons protein 2 | 0                        | 0           | -1            |
| Paf1      | Q8K2T8            | RNA polymerase II-associated factor 1 homolog                     | 0                        | 0           | 1             |
| Pclo      | Q9QYX7            | Protein piccolo                                                   | 0                        | 0           | -1            |
| Pcna      | P17918            | Proliferating cell nuclear antigen                                | 1                        | 0           | 0             |
| Pde3b     | Q61409            | cGMP-inhibited 3',5'-cyclic phosphodiesterase B                   | 0                        | -1          | 0             |
| Pdia4     | P08003            | Protein disulfide-isomerase A4                                    | 0                        | 0           | 1             |
| Pdlim4    | P70271            | PDZ and LIM domain protein 4                                      | 0                        | -1          | 0             |
| Pdlim5    | Q8CI51            | PDZ and LIM domain protein 5                                      | 0                        | -1          | 0             |
| Pdxdc1    | Q99K01            | Pyridoxal-dependent decarboxylase domain-containing protein 1     | 0                        | 1           | 0             |
| Pfkl      | P12382            | ATP-dependent 6-phosphofructokinase, liver type                   | 0                        | 1           | 0             |
| Pgam1     | Q9DBJ1            | Phosphoglycerate mutase 1                                         | 0                        | 0           | 1             |
| Pgam2     | O70250            | Phosphoglycerate mutase 2                                         | 0                        | 1           | 0             |
| Pgap1     | Q3UUQ7            | GPI inositol-deacylase                                            | 0                        | 0           | 1             |
| Pgk1      | P09411            | Phosphoglycerate kinase 1                                         | 0                        | 1           | 0             |
| Pgm1      | Q9D0F9            | Phosphoglucomutase-1                                              | 0                        | 0           | 1             |
| Phf11     | A6H5X4            | PHD finger protein 11                                             | 1                        | 0           | 0             |
| Phyhd1    | Q9DB26            | Phytanoyl-CoA dioxygenase domain-containing protein 1             | 0                        | 0           | -1            |
| Pi4k2a    | Q2TBE6            | Phosphatidylinositol 4-kinase type 2-alpha                        | 1                        | 0           | 0             |
| Pid1      | Q3UBG2            | PTB-containing, cubilin and LRP1-interacting protein              | 0                        | 0           | -1            |
| Pik3ap1   | Q9EQ32            | Phosphoinositide 3-kinase adapter protein 1                       | 0                        | 0           | -1            |
| Pik3r5    | Q5SW28            | Phosphoinositide 3-kinase regulatory subunit 5                    | 0                        | 0           | -1            |
| Pik3r6    | Q3U6Q4            | Phosphoinositide 3-kinase regulatory subunit 6                    | 0                        | 0           | -1            |
| Pikfyve   | Q9Z1T6            | 1-phosphatidylinositol 3-phosphate 5-kinase                       | 0                        | 0           | 1             |
| Pip4k2a   | O70172            | Phosphatidylinositol 5-phosphate 4-kinase type-2 alpha            | -1                       | 0           | 0             |
| Pip4k2b   | Q80XI4            | Phosphatidylinositol 5-phosphate 4-kinase type-2 beta             | 0                        | -1          | 0             |
| Pkm       | P52480            | Pyruvate kinase PKM                                               | 0                        | 1           | 0             |
| Pkn1      | P70268            | Serine/threonine-protein kinase N1                                | 0                        | 0           | -1            |

| Gene Name | UniProt Accession | Protein Name                                                     | MARPs (up: +1; down: -1) |             |               |
|-----------|-------------------|------------------------------------------------------------------|--------------------------|-------------|---------------|
|           |                   |                                                                  | Early MARP               | Middle MARP | Advanced MARP |
| Plcb3     | P51432            | 1-phosphatidylinositol 4,5-bisphosphate phosphodiesterase beta-3 | 0                        | 0           | -1            |
| Plcl2     | Q8K394            | Inactive phospholipase C-like protein 2                          | 0                        | 0           | -1            |
| Pld4      | Q8BG07            | Phospholipase D4                                                 | 0                        | 0           | -1            |
| Plekha1   | Q8BUL6            | Pleckstrin homology domain-containing family A member 1          | 0                        | 0           | 1             |
| Plekho1   | Q9JIY0            | Pleckstrin homology domain-containing family O member 1          | 0                        | 0           | -1            |
| Plgrkt    | Q9D3P8            | Plasminogen receptor (KT)                                        | 0                        | 1           | 0             |
| Plp2      | Q9R1Q7            | Proteolipid protein 2                                            | 0                        | 1           | 0             |
| Plpp3     | Q99JY8            | Phospholipid phosphatase 3                                       | 0                        | 0           | 1             |
| Plrg1     | Q922V4            | Pleiotropic regulator 1                                          | 0                        | 0           | 1             |
| Plscr3    | Q9JIZ9            | Phospholipid scramblase 3                                        | 0                        | -1          | 0             |
| Plxnb2    | B2RXS4            | Plexin-B2                                                        | 0                        | 0           | -1            |
| Pml       | Q60953            | Protein PML                                                      | 1                        | 0           | 0             |
| Pnp       | P23492            | Purine nucleoside phosphorylase                                  | 0                        | -1          | 0             |
| Pofut2    | Q8VHI3            | GDP-fucose protein O-fucosyltransferase 2                        | 0                        | 1           | 0             |
| Ppig      | A2AR02            | Peptidyl-prolyl cis-trans isomerase G                            | 0                        | -1          | 0             |
| Ppp1r18   | Q8BQ30            | Phostensin                                                       | 0                        | 0           | -1            |
| Praf2     | Q9JIG8            | PRA1 family protein 2                                            | 0                        | 0           | 1             |
| Prdx1     | P35700            | Peroxiredoxin-1                                                  | 0                        | 0           | 1             |
| Prdx4     | O08807            | Peroxiredoxin-4                                                  | 1                        | 0           | 0             |
| Prdx6     | O08709            | Peroxiredoxin-6                                                  | 0                        | 0           | 1             |
| Prkab1    | Q9R078            | 5'-AMP-activated protein kinase subunit beta-1                   | 0                        | 0           | -1            |
| Prkcd     | P28867            | Protein kinase C delta type                                      | 0                        | -1          | 0             |
| Prpf40a   | Q9RIC7            | Pre-mRNA-processing factor 40 homolog A                          | 0                        | 0           | -1            |
| Prpf8     | Q99PV0            | Pre-mRNA-processing-splicing factor 8                            | 0                        | 0           | -1            |
| Psat1     | Q99K85            | Phosphoserine aminotransferase                                   | 1                        | 0           | 0             |
| Ptp4a2    | O70274            | Protein tyrosine phosphatase type IVA 2                          | 0                        | 0           | -1            |
| Ptp4a3    | Q9D658            | Protein tyrosine phosphatase type IVA 3                          | 0                        | 0           | -1            |
| Ptprj     | Q64455            | Receptor-type tyrosine-protein phosphatase eta                   | 0                        | 0           | -1            |
| Ptrf      | O54724            | Polymerase I and transcript release factor                       | 0                        | -1          | 0             |
| Pts       | Q9R1Z7            | 6-pyruvoyl tetrahydrobiopterin synthase                          | 0                        | 0           | -1            |

| Gene Name | UniProt Accession | Protein Name                                     | MARPs (up: +1; down: -1) |             |               |
|-----------|-------------------|--------------------------------------------------|--------------------------|-------------|---------------|
|           |                   |                                                  | Early MARP               | Middle MARP | Advanced MARP |
| Pxk       | Q8BX57            | PX domain-containing protein kinase-like protein | 0                        | -1          | 0             |
| Pxn       | Q8VI36            | Paxillin                                         | 0                        | 0           | -1            |
| Pyhin1    | Q8BV49            | Pyrin and HIN domain-containing protein 1        | 1                        | 0           | 0             |
| Rab39a    | Q8BHD0            | Ras-related protein Rab-39A                      | 0                        | 0           | -1            |
| Rab3d     | P35276            | Ras-related protein Rab-3D                       | 0                        | 0           | 1             |
| Rab3il1   | Q8VDV3            | Guanine nucleotide exchange factor for Rab-3A    | 0                        | 0           | -1            |
| Rac2      | Q05144            | Ras-related C3 botulinum toxin substrate 2       | 0                        | 0           | -1            |
| Rala      | P63321            | Ras-related protein Ral-A                        | 0                        | -1          | 0             |
| Ralgapb   | Q8BQZ4            | Ral GTPase-activating protein subunit beta       | 0                        | 0           | 1             |
| Rap1b     | Q99JI6            | Ras-related protein Rap-1b                       | 0                        | 0           | -1            |
| Rap2b     | P61226            | Ras-related protein Rap-2b                       | 0                        | 0           | 1             |
| Rap2c     | Q8BU31            | Ras-related protein Rap-2c                       | 0                        | 0           | -1            |
| Rassf2    | Q8BMS9            | Ras association domain-containing protein 2      | 0                        | 0           | -1            |
| Rbbp9     | O88851            | Putative hydrolase RBBP9                         | 0                        | 0           | -1            |
| Rbm39     | Q8VH51            | RNA-binding protein 39                           | 0                        | -1          | 0             |
| Rcc1      | Q8VE37            | Regulator of chromosome condensation             | 0                        | -1          | 0             |
| Rcsd1     | Q3UZA1            | CapZ-interacting protein                         | 0                        | 0           | -1            |
| Rer1      | Q9CQU3            | Protein RER1                                     | 0                        | 1           | 0             |
| Rgs10     | Q9CQE5            | Regulator of G-protein signaling 10              | 0                        | 0           | -1            |
| Rgs19     | Q9CX84            | Regulator of G-protein signaling 19              | 0                        | 0           | -1            |
| Rhoc      | Q62159            | Rho-related GTP-binding protein RhoC             | 0                        | 1           | 0             |
| Rhog      | P84096            | Rho-related GTP-binding protein RhoG             | 0                        | 0           | -1            |
| Rhoq      | Q8R527            | Rho-related GTP-binding protein RhoQ             | 0                        | 0           | -1            |
| Rnaseh2a  | Q9CWY8            | Ribonuclease H2 subunit A                        | 0                        | 0           | 1             |
| Rnaseh2c  | Q9CQ18            | Ribonuclease H2 subunit C                        | 0                        | 1           | 0             |
| Rnf130    | Q8VEM1            | E3 ubiquitin-protein ligase RNF130               | 0                        | 0           | -1            |
| Rp2       | Q9EPK2            | Protein XRP2                                     | 0                        | 0           | -1            |
| Rpl13a    | P19253            | 60S ribosomal protein L13a                       | 1                        | 0           | 0             |
| Rpl38     | Q9JJI8            | 60S ribosomal protein L38                        | -1                       | 0           | 0             |
| Rpl7      | P14148            | 60S ribosomal protein L7                         | 1                        | 0           | 0             |



| Gene Name | UniProt Accession | Protein Name                                                      | MARPs (up: +1; down: -1) |             |               |
|-----------|-------------------|-------------------------------------------------------------------|--------------------------|-------------|---------------|
|           |                   |                                                                   | Early MARP               | Middle MARP | Advanced MARP |
| Rps15     | P62843            | 40S ribosomal protein S15                                         | 1                        | 0           | 0             |
| Rps27a    | P62983            | Ubiquitin-40S ribosomal protein S27a                              | 0                        | 0           | 1             |
| Rps6ka1   | P18653            | Ribosomal protein S6 kinase alpha-1                               | 0                        | -1          | 0             |
| Rps6ka3   | P18654            | Ribosomal protein S6 kinase alpha-3                               | 0                        | 0           | -1            |
| Rras2     | P62071            | Ras-related protein R-Ras2                                        | 0                        | 0           | -1            |
| Rtn4      | Q99P72            | Reticulon-4                                                       | 0                        | -1          | 0             |
| Scly      | Q9JLI6            | Selenocysteine lyase                                              | 0                        | 0           | 1             |
| Scepl     | Q920A5            | Retinoid-inducible serine carboxypeptidase                        | 0                        | 0           | 1             |
| Sdcbp     | O08992            | Syntenin-1                                                        | 1                        | 0           | 0             |
| Sec14l2   | Q99J08            | SEC14-like protein 2                                              | 0                        | 0           | 1             |
| Sec23ip   | Q6NZC7            | SEC23-interacting protein                                         | 0                        | 1           | 0             |
| Sec61a1   | P61620            | Protein transport protein Sec61 subunit alpha isoform 1           | 0                        | 0           | 1             |
| Sel1l     | Q9Z2G6            | Protein sel-1 homolog 1                                           | 0                        | 0           | 1             |
| Serpinc1  | P32261            | Antithrombin-III                                                  | 0                        | -1          | 0             |
| Serpini1  | O35684            | Neuroserpin                                                       | 0                        | 0           | -1            |
| Sf3b5     | Q923D4            | Splicing factor 3B subunit 5                                      | 0                        | 0           | -1            |
| Sh3bgr1   | Q9JJU8            | SH3 domain-binding glutamic acid-rich-like protein                | 0                        | 0           | 1             |
| Sh3bp1    | P55194            | SH3 domain-binding protein 1                                      | 0                        | 0           | -1            |
| Sil1      | Q9EPK6            | Nucleotide exchange factor SIL1                                   | 1                        | 0           | 0             |
| Sirpa     | P97797            | Tyrosine-protein phosphatase non-receptor type substrate 1        | 0                        | 0           | -1            |
| Slc16a1   | P53986            | Monocarboxylate transporter 1                                     | 0                        | 0           | 1             |
| Slc17a7   | Q3TXX4            | Vesicular glutamate transporter 1                                 | 0                        | 0           | 1             |
| Slc23a2   | Q9EPR4            | Solute carrier family 23 member 2                                 | 0                        | 1           | 0             |
| Slc2a5    | Q9WV38            | Solute carrier family 2, facilitated glucose transporter member 5 | 0                        | -1          | 0             |
| Slc30a3   | P97441            | Zinc transporter 3                                                | 0                        | 0           | 1             |
| Slc30a6   | Q8BJM5            | Zinc transporter 6                                                | 1                        | 0           | 0             |
| Slc35b1   | P97858            | Solute carrier family 35 member B1                                | 0                        | 0           | 1             |
| Slc35b2   | Q91ZN5            | Adenosine 3'-phospho 5'-phosphosulfate transporter 1              | 0                        | 1           | 0             |
| Slc35e1   | Q8CD26            | Solute carrier family 35 member E1                                | 0                        | 1           | 0             |
| Slc37a2   | Q9WU81            | Glucose-6-phosphate exchanger SLC37A2                             | 0                        | 0           | 1             |

| Gene Name | UniProt Accession | Protein Name                                               | MARPs (up: +1; down: -1) |             |               |
|-----------|-------------------|------------------------------------------------------------|--------------------------|-------------|---------------|
|           |                   |                                                            | Early MARP               | Middle MARP | Advanced MARP |
| Slc38a10  | Q5I012            | Putative sodium-coupled neutral amino acid transporter 10  | 0                        | 1           | 0             |
| Slc4a4    | O88343            | Electrogenic sodium bicarbonate cotransporter 1            | 0                        | 0           | 1             |
| Slc9a1    | Q61165            | Sodium/hydrogen exchanger 1                                | 0                        | 0           | -1            |
| Slco2b1   | Q8BXB6            | Solute carrier organic anion transporter family member 2B1 | 0                        | 0           | -1            |
| Slmap     | Q3URD3            | Sarcolemmal membrane-associated protein                    | 0                        | 0           | -1            |
| Smad1     | P70340            | Mothers against decapentaplegic homolog 1                  | 0                        | -1          | 0             |
| Smad2     | Q62432            | Mothers against decapentaplegic homolog 2                  | 0                        | 0           | -1            |
| Smad3     | Q8BUN5            | Mothers against decapentaplegic homolog 3                  | 0                        | -1          | 0             |
| Smim1     | P0C8K7            | Small integral membrane protein 1                          | 0                        | -1          | 0             |
| Smox      | Q99K82            | Spermine oxidase                                           | 0                        | 0           | -1            |
| Smpdl3a   | P70158            | Acid sphingomyelinase-like phosphodiesterase 3a            | 0                        | -1          | 0             |
| Smpdl3b   | P58242            | Acid sphingomyelinase-like phosphodiesterase 3b            | 0                        | -1          | 0             |
| Snx17     | Q8BVL3            | Sorting nexin-17                                           | 0                        | 0           | -1            |
| Snx18     | Q91ZR2            | Sorting nexin-18                                           | 0                        | 0           | -1            |
| Snx9      | Q91VH2            | Sorting nexin-9                                            | 0                        | 0           | -1            |
| Soat1     | Q61263            | Sterol O-acyltransferase 1                                 | 1                        | 0           | 0             |
| Soga1     | E1U8D0            | Protein SOGA1                                              | 0                        | 0           | -1            |
| Sort1     | Q6PHU5            | Sortilin                                                   | 0                        | 0           | -1            |
| Sp100     | O35892            | Nuclear autoantigen Sp-100                                 | 1                        | 0           | 0             |
| Sp3       | O70494            | Transcription factor Sp3                                   | 0                        | 0           | -1            |
| Sparc     | P07214            | SPARC                                                      | 0                        | 0           | -1            |
| Sparc1    | P70663            | SPARC-like protein 1                                       | 0                        | -1          | 0             |
| Spg20     | Q8R1X6            | Spartin                                                    | 0                        | 0           | -1            |
| Spg21     | Q9CQC8            | Maspardin                                                  | 1                        | 0           | 0             |
| Spock2    | Q9ER58            | Testican-2                                                 | 0                        | -1          | 0             |
| Sqrdl     | Q9R112            | Sulfide:quinone oxidoreductase, mitochondrial              | 0                        | -1          | 0             |
| Srbd1     | Q497V5            | S1 RNA-binding domain-containing protein 1                 | 0                        | 1           | 0             |
| Srgap2    | Q91Z67            | SLIT-ROBO Rho GTPase-activating protein 2                  | 0                        | -1          | 0             |
| Srpk2     | O54781            | SRSF protein kinase 2                                      | 1                        | 0           | 0             |
| Ssr1      | Q9CY50            | Translocon-associated protein subunit alpha                | 0                        | 1           | 0             |

| Gene Name | UniProt Accession | Protein Name                                                                 | MARPs (up: +1; down: -1) |             |               |
|-----------|-------------------|------------------------------------------------------------------------------|--------------------------|-------------|---------------|
|           |                   |                                                                              | Early MARP               | Middle MARP | Advanced MARP |
| Ssr4      | Q62186            | Translocon-associated protein subunit delta                                  | 0                        | 0           | 1             |
| Stab1     | Q8R4Y4            | Stabilin-1                                                                   | 0                        | -1          | 0             |
| Stard3nl  | Q9DCI3            | MLN64 N-terminal domain homolog                                              | 0                        | 0           | -1            |
| Stat1     | P42225            | Signal transducer and activator of transcription 1                           | 1                        | 0           | 0             |
| Stat2     | Q9WVL2            | Signal transducer and activator of transcription 2                           | 1                        | 0           | 0             |
| Stk10     | O55098            | Serine/threonine-protein kinase 10                                           | 0                        | 0           | -1            |
| Stk26     | Q99JT2            | Serine/threonine-protein kinase 26                                           | 0                        | 0           | -1            |
| Sts       | P50427            | Steryl-sulfatase                                                             | 0                        | 0           | 1             |
| Stt3b     | Q3TDQ1            | Dolichyl-diphosphooligosaccharide--protein glycosyltransferase subunit STT3B | 0                        | 0           | 1             |
| Sult1a1   | P52840            | Sulfotransferase 1A1                                                         | 0                        | 0           | -1            |
| Susd3     | Q9D176            | Sushi domain-containing protein 3                                            | 0                        | -1          | 0             |
| Syk       | P48025            | Tyrosine-protein kinase SYK                                                  | 0                        | -1          | 0             |
| Syngr1    | O55100            | Synaptogyrin-1                                                               | 0                        | 0           | 1             |
| Tamm41    | Q3TUH1            | Phosphatidate cytidyltransferase, mitochondrial                              | -1                       | 0           | 0             |
| Taok1     | Q5F2E8            | Serine/threonine-protein kinase TAO1                                         | 0                        | 0           | -1            |
| Tap2      | P36371            | Antigen peptide transporter 2                                                | 1                        | 0           | 0             |
| Tapbp     | Q9R233            | Tapasin                                                                      | 1                        | 0           | 0             |
| Tbc1d10b  | Q8BHL3            | TBC1 domain family member 10B                                                | -1                       | 0           | 0             |
| Tbc1d22a  | Q8R5A6            | TBC1 domain family member 22A                                                | 0                        | 0           | 1             |
| Tbc1d4    | Q8BYJ6            | TBC1 domain family member 4                                                  | 0                        | 0           | 1             |
| Tfap2a    | P34056            | Transcription factor AP-2-alpha                                              | 0                        | 0           | -1            |
| Tfe3      | Q64092            | Transcription factor E3                                                      | 0                        | 0           | -1            |
| Tfeb      | Q9R210            | Transcription factor EB                                                      | 0                        | 0           | -1            |
| Tgfbr1    | Q64729            | TGF-beta receptor type-1                                                     | 0                        | 0           | -1            |
| Tgm2      | P21981            | Protein-glutamine gamma-glutamyltransferase 2                                | 0                        | -1          | 0             |
| Them6     | Q80ZW2            | Protein THEM6                                                                | 0                        | 0           | 1             |
| Tigar     | Q8BZA9            | Fructose-2,6-bisphosphatase TIGAR                                            | 0                        | 0           | 1             |
| Tjp1      | P39447            | Tight junction protein ZO-1                                                  | 0                        | 0           | -1            |
| Tkt       | P40142            | Transketolase                                                                | 0                        | 1           | 0             |
| Tlk2      | O55047            | Serine/threonine-protein kinase tousel-like 2                                | 0                        | 0           | 1             |

| Gene Name | UniProt Accession | Protein Name                                                 | MARPs (up: +1; down: -1) |             |               |
|-----------|-------------------|--------------------------------------------------------------|--------------------------|-------------|---------------|
|           |                   |                                                              | Early MARP               | Middle MARP | Advanced MARP |
| Tlr2      | Q9QUN7            | Toll-like receptor 2                                         | 1                        | 0           | 0             |
| Tlr3      | Q99MB1            | Toll-like receptor 3                                         | 0                        | 0           | -1            |
| Tlr9      | Q9EQU3            | Toll-like receptor 9                                         | 0                        | -1          | 0             |
| Tm6sf1    | P58749            | Transmembrane 6 superfamily member 1                         | 0                        | -1          | 0             |
| Tm9sf1    | Q9DBU0            | Transmembrane 9 superfamily member 1                         | 0                        | 1           | 0             |
| Tm9sf3    | Q9ET30            | Transmembrane 9 superfamily member 3                         | 0                        | 1           | 0             |
| Tm9sf4    | Q8BH24            | Transmembrane 9 superfamily member 4                         | 0                        | 0           | 1             |
| Tmed10    | Q9D1D4            | Transmembrane emp24 domain-containing protein 10             | 0                        | 1           | 0             |
| Tmed3     | Q78IS1            | Transmembrane emp24 domain-containing protein 3              | 0                        | 0           | 1             |
| Tmed4     | Q8R1V4            | Transmembrane emp24 domain-containing protein 4              | 0                        | 1           | 0             |
| Tmed9     | Q99KF1            | Transmembrane emp24 domain-containing protein 9              | 0                        | 1           | 0             |
| Tmem100   | Q9CQG9            | Transmembrane protein 100                                    | 0                        | -1          | 0             |
| Tmem119   | Q8R138            | Transmembrane protein 119                                    | 0                        | -1          | 0             |
| Tmem163   | Q8C996            | Transmembrane protein 163                                    | 0                        | 0           | 1             |
| Tmem167a  | Q9CR64            | Protein kish-A                                               | 0                        | 0           | 1             |
| Tmem173   | Q3TBT3            | Stimulator of interferon genes protein                       | 0                        | 0           | -1            |
| Tmem205   | Q91XE8            | Transmembrane protein 205                                    | 0                        | 0           | 1             |
| Tmem214   | Q8BM55            | Transmembrane protein 214                                    | 0                        | 0           | 1             |
| Tmem38b   | Q9DAV9            | Trimeric intracellular cation channel type B                 | 0                        | 0           | 1             |
| Tmsb10    | Q6ZWY8            | Thymosin beta-10                                             | 0                        | 0           | 1             |
| Tnfaip8l2 | Q9D8Y7            | Tumor necrosis factor alpha-induced protein 8-like protein 2 | 0                        | -1          | 0             |
| Top2b     | Q64511            | DNA topoisomerase 2-beta                                     | 0                        | 0           | 1             |
| Tpcn1     | Q9EQJ0            | Two pore calcium channel protein 1                           | 0                        | 0           | -1            |
| Tpd52     | Q62393            | Tumor protein D52                                            | 0                        | 1           | 0             |
| Tpi1      | P17751            | Triosephosphate isomerase                                    | 0                        | 1           | 0             |
| Tpmt      | O55060            | Thiopurine S-methyltransferase                               | 0                        | 0           | -1            |
| Trem2     | Q99NH8            | Triggering receptor expressed on myeloid cells 2             | 0                        | 1           | 0             |
| Trim3     | Q9R1R2            | Tripartite motif-containing protein 3                        | 0                        | 0           | -1            |
| Trim47    | Q8C0E3            | Tripartite motif-containing protein 47                       | 0                        | 0           | -1            |
| Trim65    | Q8BFW4            | Tripartite motif-containing protein 65                       | 0                        | 0           | -1            |

| Gene Name | UniProt Accession | Protein Name                                     | MARPs (up: +1; down: -1) |             |               |
|-----------|-------------------|--------------------------------------------------|--------------------------|-------------|---------------|
|           |                   |                                                  | Early MARP               | Middle MARP | Advanced MARP |
| Trio      | Q0KL02            | Triple functional domain protein                 | 0                        | 0           | -1            |
| Triobp    | Q99KW3            | TRIO and F-actin-binding protein                 | 0                        | 1           | 0             |
| Trp53i11  | Q4QQM4            | Tumor protein p53-inducible protein 11           | 0                        | -1          | 0             |
| Tsc22d1   | P62500            | TSC22 domain family protein 1                    | 0                        | 0           | 1             |
| Ttc38     | A3KMP2            | Tetratricopeptide repeat protein 38              | 0                        | 0           | -1            |
| Ttc39b    | Q8BYY4            | Tetratricopeptide repeat protein 39B             | 0                        | 0           | 1             |
| Ttyh1     | Q9D3A9            | Protein tweety homolog 1                         | 0                        | 0           | 1             |
| Tubb5     | P99024            | Tubulin beta-5 chain                             | 0                        | 0           | -1            |
| Ube2d1    | P61080            | Ubiquitin-conjugating enzyme E2 D1               | 0                        | 0           | -1            |
| Ubl4a     | P21126            | Ubiquitin-like protein 4A                        | 0                        | 0           | 1             |
| Upk1b     | Q9Z2C6            | Uroplakin-1b                                     | 0                        | -1          | 0             |
| Usp24     | B1AY13            | Ubiquitin carboxyl-terminal hydrolase 24         | 0                        | 0           | -1            |
| Vamp4     | O70480            | Vesicle-associated membrane protein 4            | 0                        | 0           | 1             |
| Vasp      | P70460            | Vasodilator-stimulated phosphoprotein            | 0                        | 0           | -1            |
| Vat1      | Q62465            | Synaptic vesicle membrane protein VAT-1 homolog  | 0                        | 0           | 1             |
| Vav2      | Q60992            | Guanine nucleotide exchange factor VAV2          | 0                        | 0           | -1            |
| Vim       | P20152            | Vimentin                                         | 0                        | 0           | 1             |
| Vps13c    | Q8BX70            | Vacuolar protein sorting-associated protein 13C  | 0                        | 1           | 0             |
| Vrk1      | Q80X41            | Serine/threonine-protein kinase VRK1             | 0                        | -1          | 0             |
| Vtn       | P29788            | Vitronectin                                      | 0                        | 1           | 0             |
| Was       | P70315            | Wiskott-Aldrich syndrome protein homolog         | 0                        | 0           | -1            |
| Wasf2     | Q8BH43            | Wiskott-Aldrich syndrome protein family member 2 | 0                        | 0           | -1            |
| Wdfy2     | Q8BUB4            | WD repeat and FYVE domain-containing protein 2   | 0                        | 0           | -1            |
| Wdr37     | Q8CBE3            | WD repeat-containing protein 37                  | 0                        | -1          | 0             |
| Wls       | Q6DID7            | Protein wntless homolog                          | 0                        | 0           | 1             |
| Wnk1      | P83741            | Serine/threonine-protein kinase WNK1             | 0                        | 0           | -1            |
| Xdh       | Q00519            | Xanthine dehydrogenase/oxidase                   | 0                        | 0           | 1             |
| Xpo5      | Q924C1            | Exportin-5                                       | 0                        | 0           | 1             |
| Yes1      | Q04736            | Tyrosine-protein kinase Yes                      | 0                        | 0           | -1            |
| Yif1a     | Q91XB7            | Protein YIF1A                                    | 0                        | 0           | 1             |



| Gene Name | UniProt Accession | Protein Name                             | MARPs (up: +1; down: -1) |             |               |
|-----------|-------------------|------------------------------------------|--------------------------|-------------|---------------|
|           |                   |                                          | Early MARP               | Middle MARP | Advanced MARP |
| Yipf3     | Q3UDR8            | Protein YIPF3                            | 1                        | 0           | 0             |
| Zadh2     | Q8BGC4            | Prostaglandin reductase-3                | 1                        | 0           | 0             |
| Zfp11     | Q9DB43            | Zinc finger protein-like 1               | 0                        | 0           | 1             |
| Znf335    | A2A5K6            | Zinc finger protein 335                  | 0                        | 0           | 1             |
| Znf652    | Q5DU09            | Zinc finger protein 652                  | 0                        | 0           | -1            |
| Znf691    | Q3TDE8            | Zinc finger protein 691                  | 0                        | 0           | -1            |
| Zyx       | Q62523            | Zyxin                                    | 0                        | 0           | -1            |
|           | Q91V76            | Ester hydrolase C11orf54 homolog         | 0                        | 0           | -1            |
|           | Q9CRC3            | UPF0235 protein C15orf40 homolog         | 0                        | 0           | -1            |
|           | Q99K99            | Uncharacterized protein C4orf19 homolog  | 0                        | 0           | -1            |
|           | P01864            | Ig gamma-2A chain C region secreted form | 0                        | -1          | 0             |
|           | Q9CXL3            | Uncharacterized protein C7orf50 homolog  | 1                        | 0           | 0             |

**Suppl. Table 5:** Relative quantification of proteins from seven AD risk genes in APPS1 (A) or APP-KI (B) versus WT microglia. The protein LFQ ratios and p-values of AD risk genes are presented. P-values less than 0.05 are indicated in red.

**A**

| Gene Name | Ratio APPS1 vs WT |          |          |           | p-value APPS1 vs WT |          |          |           |
|-----------|-------------------|----------|----------|-----------|---------------------|----------|----------|-----------|
|           | 1 month           | 3 months | 6 months | 12 months | 1 month             | 3 months | 6 months | 12 months |
| APOE      | 1.01              | 2.44     | 4.20     | 9.25      | 8.59E-01            | 2.45E-02 | 4.47E-03 | 4.37E-05  |
| TREM2     | 0.94              | 1.40     | 2.20     | 2.88      | 1.50E-01            | 1.09E-02 | 4.82E-03 | 7.36E-06  |
| CLU       | 1.15              | 0.97     | 1.07     | 1.87      | 5.70E-03            | 6.81E-01 | 6.36E-01 | 1.11E-03  |
| INPP5D    | 1.10              | 1.38     | 1.80     | 1.71      | 2.66E-02            | 4.91E-04 | 2.86E-03 | 9.29E-05  |
| PLCG2     | 0.99              | 1.05     | 0.99     | 0.86      | 7.01E-01            | 2.27E-01 | 8.45E-01 | 1.39E-01  |
| ABI3      | 1.00              | 1.05     | 0.90     | 0.52      | 9.56E-01            | 4.72E-01 | 4.39E-01 | 1.44E-03  |
| BIN1      | 0.95              | 1.03     | 0.74     | 0.40      | 3.93E-01            | 7.08E-01 | 7.62E-02 | 2.85E-04  |

**B**

| Gene Name | Ratio APP-KI vs WT |          |          |           | p-value APP-KI vs WT |          |          |           |
|-----------|--------------------|----------|----------|-----------|----------------------|----------|----------|-----------|
|           | 1 month            | 3 months | 6 months | 12 months | 1 month              | 3 months | 6 months | 12 months |
| APOE      | 1.06               | 1.22     | 2.88     | 15.03     | 3.29E-01             | 3.04E-02 | 7.66E-04 | 3.09E-05  |
| TREM2     | 0.99               | 1.12     | 1.44     | 3.85      | 9.16E-01             | 5.55E-01 | 6.38E-03 | 6.40E-04  |
| CLU       | 0.84               | 1.10     | 0.76     | 0.72      | 2.84E-01             | 3.95E-01 | 1.80E-01 | 8.13E-02  |
| INPP5D    | 0.94               | 1.08     | 1.26     | 1.34      | 1.68E-01             | 4.30E-01 | 2.43E-02 | 5.14E-05  |
| PLCG2     | 0.97               | 0.99     | 0.74     | 0.66      | 2.33E-01             | 9.27E-01 | 1.31E-01 | 1.12E-02  |
| ABI3      | 0.95               | 0.95     | 0.67     | 0.53      | 6.55E-01             | 6.83E-01 | 1.08E-02 | 1.78E-03  |
| BIN1      | 0.99               | 0.97     | 0.72     | 0.59      | 7.39E-01             | 7.90E-01 | 5.49E-03 | 1.05E-03  |
